# Supplementary material for: Plant 24-nt reproductive phasiRNAs from intramolecular duplex mRNAs in diverse monocots
Source: HighWire-hosted journal article supplement (doi:10.1101/gr.228163.117), 2018-07-12
Supplement: Supplemental_Tables_S1_to_S6.xlsx [file Supplemental_Tables_S1_to_S6.xlsx]

## Sheet: S1. Summary statistics of data
Table S1. Summary statistics of garden Asparagus (Asparagus officinalis) sequencing libraries used in this study.
Part A. Asparagus small RNA data
Code	Title	Total Sequences	Genome Matched Reads	Distinct Genome Matched Reads	Len. of Reads After Adapter Removal (nt)	Technology	GEO Accession Number or Pubmed ID for data	Reference
leaf_r1	Asparagus cladophylls, rep1, BM14-72	30024542	26088582	2796076	18-34	single-end	GSM3083898	This study
ant1_07mm_r1	Asparagus anther 0.7mm, male1, rep1, BM14-48	44603029	37868769	5892680	18-34	single-end	GSM3083899	This study
ant2_11mm_r1	Asparagus anther 1.1mm, male2, rep1, BM14-50	51259921	43323163	7446886	18-34	single-end	GSM3083900	This study
ant3_15mm_r1	Asparagus anther 1.5mm, male3, rep1, BM14-52	42990118	36641232	6555377	18-34	single-end	GSM3083901	This study
ant4_18mm_r1	Asparagus anther 1.8mm, male4, rep1, BM14-54	53728958	43957932	7414084	18-34	single-end	GSM3083902	This study
ant5_20mm_r1	Asparagus anther 2.0mm, male5, rep1, BM14-56	30392916	25408903	3691026	18-34	single-end	GSM3083903	This study
pis_ma1_05mm_r1	Asparagus pistil 0.5mm, male1 rep1, BM14-58	39685208	34496108	4344113	18-34	single-end	GSM3083904	This study
pis_ma2_07mm_r1	Asparagus pistil 0.7mm, male2 rep1, BM14-60	28875412	24855917	3889869	18-34	single-end	GSM3083905	This study
pis_ma3_11mm_r1	Asparagus pistil 1.1mm, male3 rep1, BM14-62	31683580	27569856	3411535	18-34	single-end	GSM3083906	This study
pis_ma4_15mm_r1	Asparagus pistil 1.5mm, male4, rep1, BM14-64	30283321	25730428	3707690	18-34	single-end	GSM3083907	This study
pis_ma5_18mm_r1	Asparagus pistil 1.8mm, male5 rep1, BM14-66	29394111	24907377	3319557	18-34	single-end	GSM3083908	This study
pis_fe1_15mm_r1	Asparagus pistil 1.5mm, female1, rep1, BM14-74	28794913	24810788	3503894	18-34	single-end	GSM3083909	This study
pis_fe2_20mm_r1	Asparagus pistil 2.0mm, female2, rep1, BM14-76	31706438	27193425	3437506	18-34	single-end	GSM3083910	This study
pis_fe3_28mm_r1	Asparagus pistil 2.8mm, female3, rep1, BM14-78	28882041	24124807	3750256	18-34	single-end	GSM3083911	This study
pis_fe4_35mm_r1	Asparagus pistil 3.5mm, female4, rep1, BM14-80	33046715	27551793	4760947	18-34	single-end	GSM3083912	This study
pis_fe5_42mm_r1	Asparagus pistil 4.2mm, female5, rep1, BM14-82	32476318	27107377	3298178	18-34	single-end	GSM3083913	This study
pis_fe6_45mm_r1	Asparagus pistil 4.5mm, female6, rep1, BM14-84	39544560	32972952	4612981	18-34	single-end	GSM3083914	This study
shoot_old_r1	Asparagus shoot, old spear, rep1, BM14-68	33829729	28964427	3122177	18-34	single-end	GSM3083915	This study
shoot_you_r1	Asparagus shoot, young plant, rep1, BM14-70	30917138	26512078	2830267	18-34	single-end	GSM3083916	This study
88_Fs	Spears from a female plant, line 88	51071610	44361206	12174564	18-34	single-end	PMID: 29093472	Harkess et al., 2017
88_Ms	Spears from a male plant, line 88	47521321	41489178	11116150	18-34	single-end	PMID: 29093472	Harkess et al., 2017
88_SMs	Spears from a super male plant, line 88	53130780	46200778	11821295	18-34	single-end	PMID: 29093472	Harkess et al., 2017
89_Fs	Spears from a female plant, line 89	49631096	42785176	9445138	18-34	single-end	PMID: 29093472	Harkess et al., 2017
89_Ms	Spears from a male plant, line 89	44181331	37349173	9729097	18-34	single-end	PMID: 29093472	Harkess et al., 2017
89_SMs	Spears from a super male plant, line 89	48687896	40755331	9644782	18-34	single-end	PMID: 29093472	Harkess et al., 2017
103_Fs	Spears from a female plant, line 103	53644329	44843564	10916426	18-34	single-end	PMID: 29093472	Harkess et al., 2017
103_Ms	Spears from a male plant, line 103	51686019	43075904	9482442	18-34	single-end	PMID: 29093472	Harkess et al., 2017
St_Aspa	Asparagus shoot	48684914	39392106	8431386	18-34	single-end	PMID: 29093472	Harkess et al., 2017
Lf_Aspa	Asparagus cladophylls	44967647	37868082	6553948	18-34	single-end	PMID: 29093472	Harkess et al., 2017
Rt_Aspa	Asparagus root	28265822	15523108	2845038	18-34	single-end	PMID: 29093472	Harkess et al., 2017
MFE_Aspa	Asparagus male flower early stage	40926331	33278523	8930903	18-34	single-end	PMID: 29093472	Harkess et al., 2017
MFM_Aspa	Asparagus male flower mid stage	56362666	46066266	10196795	18-34	single-end	PMID: 29093472	Harkess et al., 2017
FeFE_Aspa	Asparagus female flower early stage	43941398	35592215	9263600	18-34	single-end	PMID: 29093472	Harkess et al., 2017
FeFM_Aspa	Asparagus female flower mid stage	58262210	48153462	9493296	18-34	single-end	PMID: 29093472	Harkess et al., 2017
Asp_0_5_ant_bud	Asparagus, <0.5 mm anthers (whole buds), BM14-181	36110327	27770843	7025326	18-34	single-end	GSM3083917	This study
Asp_1_ant_bud	Asparagus, 0.5 - 1.0 mm anthers (whole buds), BM14-182	31534472	23350045	5321879	18-34	single-end	GSM3083918	This study
Asp_1_5_ant_bud	Asparagus, 1.0 - 1.5 mm anthers (whole buds), BM14-183	41127611	33446841	4022099	18-34	single-end	GSM3083919	This study
Asp_1_0_ant	Asparagus, 0.5 - 1.0 mm anthers, BM14-184	33450319	26021154	4071462	18-34	single-end	GSM3083920	This study
Asp_1_5_ant	Asparagus, 1.0 - 1.5 mm anthers, BM14-185	37476488	29030034	7179341	18-34	single-end	GSM3083921	This study
Part B. Asparagus RNA-seq data
Code	Title	Total Sequencesa	Genome Matched Reads	Distinct Genome Matched Reads	Len. of Reads (nt)	Technology	GEO Accession Number	Reference
Asp_leaf	Asparagus, cladophylls, BM14-72	31990892	14690194	3111600	100	single-end	GSM3083924	This study
Asp_0_5_ant_budr	Asparagus, <0.5 mm anthers (whole buds), BM14-181	26788747	10593969	2705490	100	single-end	GSM3083922	This study
Asp_1_ant_budr	Asparagus, 0.5 - 1.0 mm anthers (whole buds), BM14-182	24637152	10657889	2806443	100	single-end	GSM3083923	This study
Asp_le	Asparagus, cladophylls, BM14-72	34433768	15163706	2791096	150	paired-end	GSM3083927	This study
Asp_0_5_ant_b	Asparagus, <0.5 mm anthers (whole buds), BM14-181	30330547	11162814	2399093	150	paired-end	GSM3083925	This study
Asp_1_ant_b	Asparagus, 0.5 - 1.0 mm anthers (whole buds), BM14-182	30145994	12319937	2626547	150	paired-end	GSM3083926	This study
Part C. Asparagus RNA structure data
Code	Title	Total Sequences	Genome Matched Reads	Distinct Genome Matched Reads	Len. of Reads (nt)	Technology	GEO Accession Number	Reference
05_ant_bud_o	Asparagus dsRNA, <0.5 mm anthers (whole buds), BM14-181, Rnase ONE	12342640	6897413	294724	51	single-end	GSM3083928	This study
05_10_ant_bud	Asparagus dsRNA, 0.5 - 1.0 mm anthers (whole buds), BM14-182, Rnase ONE	12111370	7107136	255080	51	single-end	GSM3083929	This study
05_ant_bud_v	Asparagus dsRNA, <0.5 mm anthers (whole buds), BM14-181, Rnase V1	20531053	15283502	215299	51	single-end	GSM3083930	This study
05_10_ant_bud_v	Asparagus dsRNA, 0.5 - 1.0 mm anthers (whole buds), BM14-182, Rnase V1	13925322	9800453	263252	51	single-end	GSM3083931	This study
Part D. Asparagus PacBio "SMRT" data
Code	Title	Total Sequences	Full-lengthb	high-quality transcriptsc	Average Len. of Reads (nt)	Technology	GEO Accession Number	Reference
Aspa-denovo-A-2kb	Asparagus, <=0.5 and 0.5-1.0mm anther, <2kb insert length (3 SMRT cells)	213951	120540	30059	939	SMRT-seq	GSM3083932	This study
Aspa-denovo-B-2kb-3kb	Asparagus, <=0.5 and 0.5-1.0mm anther, 2-3 kb insert length (3 SMRT cells)	294820	106233	29932	1772	SMRT-seq	GSM3083933	This study
Aspa-denovo-C-3kb	Asparagus, <=0.5 and 0.5-1.0mm anther, >3 kb insert length (3 SMRT cells )	240945	48792	13083	2653	SMRT-seq	GSM3083934	This study
Part E. Asparagus PARE data
Code	Title	Total Sequences	Genome Matched Reads	Distinct Genome Matched Reads	Len. of Reads (nt)	Technology	Pubmed ID of data source	Reference & data source
88F_d	Spears from a female plant, line 88	22588072	18009351	5119938	22	PARE	PMID: 29093472	Harkess et al., 2017	PMID: 29093472
88M_d	Spears from a male plant, line 88	25441003	20220748	5756736	22	PARE	PMID: 29093472	Harkess et al., 2017
88SM_d	Spears from a super male plant, line 88	20141905	16066747	4435945	22	PARE	PMID: 29093472	Harkess et al., 2017
89F_d	Spears from a female plant, line 89	21201482	16656387	4993468	22	PARE	PMID: 29093472	Harkess et al., 2017
89M_d	Spears from a male plant, line 89	19713775	15518328	5178869	22	PARE	PMID: 29093472	Harkess et al., 2017
89SM_d	Spears from a super male plant, line 89	22629307	18002394	5022618	22	PARE	PMID: 29093472	Harkess et al., 2017
103F_d	Spears from a female plant, line 103	26367163	20496055	6143486	22	PARE	PMID: 29093472	Harkess et al., 2017
103M_d	Spears from a male plant, line 103	21334611	16554967	5335489	22	PARE	PMID: 29093472	Harkess et al., 2017
AspM_mid	Male flower mid stage	28944491	23471321	7666998	22	PARE	PMID: 29093472	Harkess et al., 2017
AspM_ear	Male flower early stage	29656483	23953176	7516117	22	PARE	PMID: 29093472	Harkess et al., 2017
AspFM_mid	Female flower mid stage	25144959	20389169	6740980	22	PARE	PMID: 29093472	Harkess et al., 2017
AspFM_ear	Female flower early stage	23728164	19220543	6678019	22	PARE	PMID: 29093472	Harkess et al., 2017
Asp_shoot	Shoot	21734779	17515947	5978640	22	PARE	PMID: 29093472	Harkess et al., 2017
Asp_Lf	cladophylls	24820749	20086849	6155791	22	PARE	PMID: 29093472	Harkess et al., 2017
a Numbers of read pairs are listed for paired-end libraries
b Full-length, non-chimeric isoforms
c Polished (corrected) high-quality consensus transcripts

## Sheet: S2. 21-22 nt miRNAs
Table S2. New members of conserved miRNA families, and lineage/specific miRNA candidates identified in Asparagus from 35 sRNA libraries
								miRNA abundance in 35 sRNA libraries from Asparagus
miRNA namea	chr	start	end	strand	length	hitsb	sequence	MFE_Aspa	MFM_Aspa	FeFE_Aspa	FeFM_Aspa	St_Aspa	Lf_Aspa	Rt_Aspa	leaf_r1	shoot_old_r1	shoot_you_r1	88_Fs	88_Ms	88_SMs	89_Fs	89_Ms	89_SMs	103_Fs	103_Ms	Asp_0_5_ant_bud	ant_mei	ant_mei2	ant_post1	ant4_18mm_r1	ant5_20mm_r1	pis_ma1_05mm_r1	pis_ma2_07mm_r1	pis_ma3_11mm_r1	pis_ma4_15mm_r1	pis_ma5_18mm_r1	pis_fe1_15mm_r1	pis_fe2_20mm_r1	pis_fe3_28mm_r1	pis_fe4_35mm_r1	pis_fe5_42mm_r1	pis_fe6_45mm_r1
A. New members of known miRNA families, annotated using miRBase version 21
aof-miR159b	6	14115399	14115584	w	21	4	CTTGCATGACTCAGGAGCTTC	1895	1109	1070	969	835	2546	603	2139	1458	1698	1018	1943	1206	1072	1049	594	1357	1859	682	271.5	95.5	96.5	355	472	1097	973	934	1138	1556	1224	692	833	1005	547	1707
aof-miR159c	5	113953886	113954019	c	21	1	TGGAGTGAGGGGAGCTCCCAT	5	0	5	0	0	0	87	0	0	0	3	0	1	6	2	1	1	0	0	0	0	0	0	0	0	0	0	0	0	0	0	0	0	0	0
aof-miR164b	7	11080187	11080320	w	21	2	CATGTGCCCATCTTTTCCATC	41	82	35	55	198	64	145	8	126	32	11	19	18	29	18	26	9	23	1	3	2.5	1.5	1	4	23	10	12	15	29	8	12	22	21	30	17
aof-miR164c	5	11050130	11050263	w	21	1	CATGTGCTCATCTTCTCCATC	61	6	27	11	137	17	77	5	146	32	4	6	2	5	9	13	14	4	1	0.5	1.5	1	0	0	19	14	11	7	8	12	7	5	8	1	3
aof-miR169d	7	54224773	54224906	w	21	2	TAAGCCAAGGATGACTTGCCA	22	27	14	8	15	20	2	0	1	1	2	12	3	4	2	3	1	8	2	1	3	2.5	3	2	1	0	0	0	1	1	0	0	2	2	1
aof-miR171d	3	25631477	25631611	c	21	2	TTGAGCCGTGCCAATATCACG	24	10	19	7	18	99	0	41	11	24	5	9	6	12	11	6	4	13	15	6	8	10	42	58	2	4	0	0	0	0	0	1	0	1	0
aof-miR171e	6	10404995	10405125	w	21	1	CGATATTGGCGCGGTTCAACC	0	1	1	0	0	0	2	0	0	0	0	0	0	0	0	0	0	1	0	0	4	7	225	68	0	0	0	0	1	0	0	0	0	1	0
aof-miR171f	3	25631476	25631611	c	21	1	TATTAGTGCGGTTCAATTAGA	41	62	40	30	11	31	0	2	1	2	7	9	5	6	9	7	30	22	10	11	1.5	1.5	6	4	4	2	1	1	1	1	1	4	9	0	5
aof-miR2118d.t3	na	na	na	na	22	0	TTTCCAATGCCTCCCATTCCGA	42	12	19	13	22	17	21	0	4	1	23	17	19	6	7	0	39	17	0	0	0	0	1	0	0	0	0	0	0	0	0	2	0	2	1
aof-miR2118d.t1	na	na	na	na	22	0	TTTCCAATGCCTCCCATTCCGC	51	11	37	16	28	21	15	0	0	0	17	19	26	6	15	0	50	31	0	0.5	0.5	1	0	0	0	0	1	1	0	0	0	0	0	0	2
aof-miR2118d.t2	na	na	na	na	22	0	TTTCCAATGCCTCCCATTCCGT	16	5	16	6	27	6	0	0	0	0	5	3	5	6	4	0	25	15	0	1.5	1	0.5	0	0	0	4	0	0	0	1	0	0	0	0	0
aof-miR2118d.v1	1	123326577	123326777	c	21	1	TTTCCAATGCCTCCCATTCCG	102	36	79	41	129	52	19	2	6	5	30	20	44	11	22	1	130	87	8	5	9.5	6	9	6	9	6	7	2	2	1	8	2	2	2	0
aof-miR319c	8	124982842	124982976	c	22	1	TGGCTGCCGACTCATTCATTCA	209	155	253	136	628	52	361	21	519	502	224	174	216	294	375	370	443	242	525	101.5	36.5	39	51	74	322	334	214	409	298	160	142	210	170	134	204
aof-miR319d	8	124965119	124965342	c	22	3	CTTGGACTGAAGGGAGCTCCCT	28292	26208	26309	22983	98810	7841	7951	595	37542	20171	37053	26695	31720	26816	22798	19810	25868	21936	9772	4321.5	644	448	633	743	13278	15072	13911	23604	19960	10234	5233	6280	10113	15395	8576
aof-miR319e	8	124965119	124965342	c	21	1	ACTGAATGATGCGGGAGCCAA	50	29	65	39	362	2	14	1	39	18	51	33	34	32	22	21	29	42	17	15.5	5	3	1	1	133	113	303	56	65	123	71	47	132	40	69
aof-miR399c	6	35651085	35651178	c	21	4	TGCCAAAGGAGATTTGCCCAG	1	3	4	3	45	1	0	0	1	1	3	0	1	1	1	0	0	0	2	0.5	0	0.5	1	0	0	0	1	0	0	0	1	0	1	0	0
B. Known members of miRNA families, also reported by us in Harkess et al. (2017), annotated using miRBase version 21
aof-miR156a	2	18070343	18070444	c	20	7	TGACAGAAGAGAGTGAGCAC	153	503	47	60	51	1767	73	2817	214	442	7	79	18	48	47	104	1	14	202	398.5	539.5	890	4135	2455	100	127	79	142	118	70	85	128	102	102	48
aof-miR156b	1	113364864	113364999	c	21	2	TTGACAGAAGATAGAGAGCAC	143	1541	81	100	11	2258	7354	643	354	997	80	234	91	427	471	342	61	137	133	1634.5	2043.5	1906	415	447	137	134	67	30	57	63	33	35	71	38	66
aof-miR156c	5	94483334	94483436	c	20	5	TGACAGAAGAGAGAGAGCAC	0	9	0	26	0	2	0	1	0	0	0	0	0	0	2	2	0	1	0	2.5	1.5	8.5	94	63	126	139	37	12	10	400	554	601	222	398	404
aof-miR159a	6	14115356	14115626	w	21	6	TTTGGATTGAAGGGAGCTCTA	162040	76315	153379	79785	207680	146352	51709	77185	58713	67340	150494	99606	146822	130400	127769	90830	188728	140410	23713	9555	4003	4714.5	15249	19296	57387	59596	47416	49648	62739	46921	51688	57535	37387	11876	53788
aof-miR160a	1	130465963	130466065	w	21	2	TGCCTGGCTCCCTGAATGCCA	0	1	2	0	5	29	15	0	0	0	1	2	1	0	2	0	0	0	0	0	0	0.5	0	0	0	0	0	0	0	0	0	0	0	0	0
aof-miR160b	6	483226	483350	c	21	3	TGCCTGGTTCCCTGTATGCCA	1508	737	1091	932	693	1328	131	177	301	197	327	421	421	716	883	731	1071	1097	890	415.5	234	166	327	403	1258	1419	432	771	949	700	772	1144	655	1298	1037
aof-miR160c	6	75997118	75997223	c	21	2	TGCCTGGCTCCCTGTATGCCA	1183	947	852	881	646	1676	41	5	1	3	245	381	274	501	512	358	790	1174	89	69.5	28.5	15	13	15	80	80	21	33	42	22	46	91	52	65	99
aof-miR164a	5	11050130	11050262	w	21	6	TGGAGAAGCAGGGCACGTGCA	158	150	112	122	187	303	916	11	100	53	20	23	23	40	47	50	64	79	1	1	1.5	2	3	2	10	5	5	16	8	5	2	4	5	0	9
aof-miR166a	3	10001292	10001423	c	21	5	TCTCGGACCAGGCTTCATTCC	417968	524083	532653	265521	497007	331158	2205566	497290	415960	644155	277885	406329	422852	350410	325855	288717	438225	309025	132657	111059	66905	76115.5	162406	131051	104266	136709	200580	350585	319787	223993	113736	174281	115134	145393	140721
aof-miR166b	7	138024221	138024400	c	21	1	TCTCGGACCAGGCTTCATTCT	29435	18386	32386	11440	57069	12154	1318	8858	17901	8973	18223	14522	25629	27696	36729	34489	40286	18359	16669	5425.5	1436.5	1475	1321	789	5617	4811	4830	5546	5895	2382	971	1767	1520	1823	1510
aof-miR166c	7	146958518	146958638	w	21	1	TCGGACCAGGCTTCATCCCCC	78300	20158	63724	15998	14315	23152	491	11632	4185	4300	18399	16310	28001	58954	52741	39005	34867	44179	86454	26850	14416.5	27922.5	706253	381556	33981	43986	10899	15212	13321	26888	12300	15560	12814	29472	14928
aof-miR166d	1	23336696	23336917	c	21	6	TCGGACCAGGCTTCATTCCCC	890571	710772	748531	524927	647854	1454229	645223	3243144	1389174	2395369	278943	376779	454761	744330	744373	779975	831449	848397	1192448	642002	387048	481998	2405983	1709233	991772	1661646	515757	857754	658098	690524	363397	480005	311202	711225	421036
aof-miR166e	7	146958435	146958588	w	21	3	TCGGACCAGGCTTCATTCCTC	125361	96120	83028	64944	44942	150400	1577	26226	8755	5988	34335	52445	53140	73350	88735	86743	83876	107193	53188	32132.5	19966.5	20150.5	165978	80718	37376	58718	19577	28768	22813	28084	14701	19933	14739	21420	16993
aof-miR167a	8	68461694	68461821	c	21	3	TGAAGCTGCCAGCATGATCTA	630	168	421	178	121	471	8	30	1	7	101	247	126	149	251	230	442	571	67	37	39.5	25	74	63	36	34	5	6	6	17	28	29	16	3	20
aof-miR167b	3	12027534	12027659	w	22	2	TGAAGCTGCCAGCATGATCTGA	1916	10312	2901	4423	211	20261	850	36418	11983	22510	97	619	176	682	2256	1475	484	1703	11237	19070	23997.5	28384	80796	41877	2356	2892	432	175	176	4071	4578	5646	2873	4248	3492
aof-miR167c	6	1977018	1977272	w	21	4	TGAAGCTGCCAGCATGATCTG	676	1526	754	386	1445	2396	4545	5174	2402	4303	577	859	629	893	1326	1220	1309	1095	880	1891	2186.5	2742.5	2380	1986	450	544	184	92	88	258	85	77	71	56	75
aof-miR168a	unassigned	39519994	39520157	w	21	1	TCGCTTGGTGCAGGTCGGGAA	2016	2688	1766	1615	1804	4314	4596	3485	2573	3459	743	967	947	937	941	608	911	1565	1563	1967.5	1301.5	1243.5	1097	592	865	1030	456	799	759	461	906	1694	992	1636	1095
aof-miR168b	4	143360978	143361109	w	21	1	TCGCTTGGTGCAGGTCGGGTC	3991	7905	3666	4172	10293	4261	2271	4474	7006	3398	7028	6654	6382	4251	5032	3508	6190	5137	3013	3882	3366	3394.5	1310	1334	3267	4611	3572	5641	14699	3643	1526	2467	3294	8934	3612
aof-miR169a	2	81968177	81968301	c	21	4	TAGCCAAGGATGATTTGCCTA	23	63	32	39	5	32	46	1	6	2	7	27	10	6	3	10	3	8	1	8	16.5	3	10	11	0	0	0	0	4	2	4	6	3	3	4
aof-miR169b	1	2604704	2604823	c	21	2	TAAGCCAAGGATGACTTGCCT	21	41	14	23	18	37	12	3	0	12	0	4	2	9	2	1	1	6	5	11	7	3.5	12	6	1	1	0	1	7	0	3	24	4	22	3
aof-miR169c	10	7883320	7883432	w	20	7	TAGCCAAGGATGACTTGCCT	588	903	566	455	180	795	178	55	156	122	233	456	375	292	150	492	49	350	327	472.5	586.5	340	457	367	77	62	30	24	147	52	58	213	133	339	133
aof-miR171a	7	95110467	95110621	w	21	2	TGATTGAGCCGTGCCAATATC	282	155	241	149	88	288	4	15	0	3	89	91	92	146	152	63	149	338	73	55	55	33.5	89	43	63	66	26	57	86	46	64	86	74	66	110
aof-miR171b	5	123303160	123303274	c	21	2	TTGAGCCGCGCCAATATCACT	148	38	90	30	170	68	2	0	24	40	99	43	78	116	168	50	94	129	27	26	17	24	10	2	17	11	0	1	0	12	13	16	13	1	25
aof-miR171c	3	25675520	25675652	c	21	1	TTGAGCCGCGTCAATATCTCC	949	1117	827	1205	273	1058	17	231	63	81	180	342	227	381	483	401	356	623	531	403	323.5	313.5	461	269	400	467	102	112	149	138	167	192	209	168	300
aof-miR172a	2	1575429	1575532	c	21	5	AGAATCTTGATGATGCTGCAT	302	207	235	169	308	376	222	11	35	20	202	179	173	127	162	115	310	208	38	33.5	54.5	62.5	203	166	8	6	4	2	2	8	19	35	13	31	16
aof-miR2118a	1	113059844	113059986	c	22	1	CTCCCGATGCCACCTAATCCTT	7721	6963	12134	5743	394	82	274	1	17	5	122	1008	456	1584	3760	1829	727	3152	6007	6905.5	6637	1798	476	507	687	513	133	94	82	243	324	214	196	81	137
aof-miR2118b	1	113067148	113067272	c	22	1	TTCCCGAAGCCTCCCATTTCTA	155	57	218	69	3	1	0	0	0	0	5	69	28	69	194	77	47	50	14	36.5	36.5	27.5	11	24	17	13	2	1	4	13	0	1	2	0	1
aof-miR2118c	1	113061954	113062069	c	22	1	TTTCCGATGCCACCCAATCCTT	68	51	71	61	0	0	2	0	1	0	1	7	1	13	18	12	8	22	5	23	20.5	10	3	7	10	11	0	2	4	2	6	2	2	1	1
aof-miR2118d	1	123326605	123326721	w	22	1	TTTCCAATGCCTCCCATTCCGG	19408	8053	16008	6813	26307	11688	4211	330	494	161	8459	6234	8297		7971	13	22391	22761	1090	966	1233.5	947	1175	1183	1910	2619	486	321	285	478	414	303	364	345	637
aof-miR2118e	4	19025447	19025561	c	22	1	TTTCCAAAACCTCCCATTCCGA	587	899	705	672	2682	204	12324	25	74	28	2355	1694	1682	968	1110	1756	1	3	54	118	212	308.5	181	96	61	47	10	12	14	15	15	24	20	25	16
aof-miR2275a	4	143037683	143037768	w	22	1	TTCGGTTTCCTCCAACATCTCA	193	165	270	118	0	1	0	0	0	0	0	17	3	18	92	13	7	117	103	188.5	178	112	3	1	4	1	0	1	0	2	0	2	1	0	0
aof-miR2275b	4	142461369	142461525	w	22	1	TCTGGTTTCCTCCAATATCTCA	31	250	45	12	0	1	2	0	0	0	0	7	0	4	15	1	0	24	5	53	54.5	47	0	0	1	4	0	0	0	0	0	0	0	0	0
aof-miR2275c	4	142464985	142465107	w	22	1	TTTGATTTCCTCCAATATCTCA	12	94	13	7	0	0	0	0	0	0	0	5	0	1	6	2	0	2	1	8	9.5	8	0	0	0	0	0	0	0	0	0	0	0	0	0
aof-miR2275d	4	142461455	142461583	w	22	1	TTCAATTTCCTCCGATATCTCA	23	100	25	3	0	0	0	0	0	0	0	11	1	12	10	10	1	27	0	43.5	45.5	26	0	0	4	0	0	0	0	0	0	0	0	0	0
aof-miR319a	5	113982298	113982489	w	21	3	TTGGACTGAAGGGAGCTCCCT	41868	28083	46508	27837	104723	5966	37309	233	3649	4607	42148	37607	34983	31398	34710	36313	59804	57226	16383	5726	1412.5	1100.5	1260	1543	11300	15470	21455	38543	39612	8965	8282	12883	13641	6339	13605
aof-miR319b	9	6435045	6435143	c	21	1	TTTGGACTGAAGGGAGCTCCT	2093	2434	2058	3052	1474	2815	162	1050	734	1109	2471	2584	2148	1583	2079	2024	2620	3117	2760	951.5	536.5	324	311	220	610	533	1051	1511	2686	2786	1650	2947	2937	2975	3191
aof-miR390a	8	127059777	127059922	c	21	2	AAGCTCAGGAGGGATAGCGCC	962	800	765	1088	521	883	33	137	41	16	636	873	800	1179	1093	573	722	922	1331	567.5	355.5	268.5	222	102	990	1326	317	176	122	430	259	198	371	923	338
aof-miR393a	7	1318320	1318436	w	22	2	TCCAAAGGGATCGCATTGATTC	59	120	49	65	550	63	1082	3	86	5	68	34	53	29	35	21	31	51	19	89	87	120	483	306	23	34	16	23	52	19	33	50	26	81	70
aof-miR393b	1	16904586	16904722	w	22	2	TCCAAAGGGATCGCATTGATCT	3869	22832	13885	18411	4382	19137	617	853	1106	1043	1728	4654	1994	539	855	612	646	3064	1898	16012.5	21934	24029.5	30637	16009	851	1365	634	549	463	1917	2213	2769	3159	6980	4154
aof-miR394a	7	86034008	86034118	c	20	2	TTGGCATTCTGTCCACCTCC	581	328	408	383	308	250	99	53	7	32	268	294	180	208	257	172	419	474	413	155.5	59.5	94	124	83	110	150	90	121	178	12	225	284	223	21	100
aof-miR395a	8	417908	418018	w	21	10	TGAAGTGTTTGGGGGAACTCT	280	332	104	580	353	130	414	69	3	156	9	4	5	14	27	137	70	9	29	81	41	23	23	20	42	7	2	30	42	1	20	57	2	33	2
aof-miR395b	7	142801792	142801891	w	21	1	ATGAAGTGTATGGGGGAACTC	42	49	19	74	34	13	2	14	4	32	0	1	1	3	0	2	1	0	13	7	5	1	3	5	6	0	0	2	1	0	0	2	0	3	0
aof-miR396a	10	6303126	6303347	w	21	2	TTCCACGGCTTTCTTGAACTG	8272	34816	9793	14329	30982	73133	13725	285901	163313	170907	2307	3167	2733	3369	4852	4780	2413	5622	3431	25725.5	38671	69262	293598	202043	22773	31124	25933	43003	53048	34562	29552	47685	35038	80787	55980
aof-miR396b	5	125132616	125132749	w	21	5	TTCCACAGCTTTCTTGAACTG	2639	7261	2906	3881	4220	12771	36994	29848	85062	68651	528	1856	906	1317	1072	1220	779	1449	2097	3488	3666.5	3040.5	6371	10683	951	1223	2804	9969	18033	4860	6849	13705	5164	14673	11546
aof-miR398a	4	6185510	6185631	c	21	1	TGTGTTCTCAGGTCGCCCCTG	56	135	184	548	390	10618	33	8362	897	399	9	344	40	724	35	333	385	623	23	33.5	83.5	185.5	352	138	16	13	49	260	125	33	4	6	12	34	18
aof-miR399a	4	71274935	71275043	w	21	1	TGCCAAAGGAGAGTTGCCCTG	935	2815	904	1827	449	3870	27	163	519	217	115	19	25	52	715	38	31	42	39	121.5	95.5	70.5	117	105	43	52	44	181	343	24	8	44	29	59	31
aof-miR399b	6	43289967	43290097	c	21	2	GTGCAACTCTCCTTTGGCACC	534	2049	362	708	745	1054	72	121	126	472	479	56	171	10	48	8	100	57	8	69.5	52	37	111	46	10	12	13	91	246	5	13	37	10	271	9
aof-miR408a	7	36120960	36121110	c	21	1	TGCACTGCCTCTTCCCTGGCT	20	64	28	120	40	1015	8	258	574	135	5	37	10	49	9	32	21	63	16	24	47.5	66.5	123	84	22	11	11	50	73	21	11	24	16	30	25
aof-miR4376a	2	3701905	3702058	c	21	1	TACGCAGGAGAGATGATGCCA	28	11	25	2	130	31	2	2	16	8	52	55	51	40	27	32	45	24	6	1	0.5	0.5	0	0	2	4	1	2	5	1	0	0	7	1	4
aof-miR477a	1	106823677	106823806	w	21	2	ACTCTCCCTCAAGGGCTTCCG	146	302	169	211	242	87	727	45	65	57	164	198	99	69	172	63	72	158	143	79	96.5	56	73	73	17	18	14	2	29	10	13	29	33	21	35
aof-miR479a	4	140099175	140099291	w	21	2	TGAGCCGAACCAATATCACTC	227	411	249	364	2587	36	9035	47	198	110	836	1410	918	726	713	869	2324	962	311	469	512	489	98	100	477	624	173	132	107	132	45	47	76	33	101
aof-miR5139a	5	120387925	120388007	w	20	12	GAAACCTGGCTCTGATACCA	90	72	105	104	72	110	87	185	220	204	85	38	76	113	92	37	82	128	1574	1193	1804.5	2339	184	515	449	198	266	288	353	398	662	837	1279	905	1261
aof-miR535a	1	4930219	4930355	w	21	2	TGACAACGAGAGAGAGCACGC	1010	663	572	430	598	2332	6666	1221	3150	2164	186	810	488	942	561	790	141	331	786	498	134.5	114	246	411	335	275	218	246	199	340	870	764	585	460	626
aof-miR536a	5	126584649	126584799	c	21	1	TCGTGCCACGCTGTGTGCGTC	42	46	19	22	120	96	0	9	0	0	36	14	7	2	7	7	8	3	3	2	1	1	1	1	0	0	1	0	5	0	0	2	1	1	1
aof-cand8002	3	36573522	36573659	w	21	13	CATCCTTCAAGATCGAGGTCT	115	166	97	67	158	467	686	36	61	100	26	61	27	74	58	88	221	34	28	30	16.5	14.5	31	20	19	17	12	40	77	30	28	35	70	45	84
aof-cand8003	6	11597032	11597108	c	21	6	TTCCACCATCTCGTGTCCCCC	88	193	157	126	732	6	6	0	0	0	491	488	443	168	145	121	181	128	2	15	24	15.5	16	25	90	298	58	7	14	30	12	12	13	6	10
aof-cand8004	9	56297301	56297397	w	21	1	CGAATCAAACACATTGTCGAG	11	5	28	3	104	173	180	74	3	48	11	22	8	0	6	2	3	5	3	1.5	0.5	1	6	0	4	4	2	6	5	6	2	2	1	0	1
aof-cand8005	7	38140716	38140888	w	22	4	TTGGCAGCGGCTGTAGAGCTGC	23	37	35	1	48	1	25	6	0	0	72	72	66	23	51	18	1	0	12	13	22	3	5	1	2	5	13	5	7	4	1	0	16	3	6
aof-cand8006	4	11914110	11914315	w	22	2	CACCTTAACTCGTACCTGTTAG	360	221	275	161	417	90	48	85	69	57	222	87	164	116	238	78	199	246	79	119.5	70.5	66	30	19	143	200	63	115	112	125	83	86	91	122	104
aof-cand8007	7	39586999	39587101	c	21	3	TATTTTCGAGACAGTTGTAAC	82	92	88	58	63	140	41	22	36	10	0	0	0	0	43	76	78	55	85	37.5	60.5	56	176	136	30	47	32	29	39	23	18	35	25	61	25
aof-cand8008	4	49279682	49279950	w	21	2	TCGGGTGCAGTTGGATCTGCG	34	29	32	17	59	55	68	25	4	23	28	16	20	7	15	4	15	4	14	5.5	6.5	2	16	20	2	8	5	262	1	1	1	5	1	23	2
aof-cand8012	4	88136578	88136684	c	21	2	TTCACGGCGTTCTCGAACTCC	219	113	144	113	466	463	6	113	157	78	405	369	460	230	238	166	444	301	98	105	76.5	51.5	51	28	63	105	85	118	99	172	68	103	125	164	138
aof-cand8015	2	77580163	77580327	w	22	5	AGAGAAGTCGGTCTAAATGCTC	40	44	97	40	75	86	23	48	71	60	112	90	121	154	64	51	87	42	59	33.5	30.5	23.5	21	17	22	10	17	22	25	15	17	21	14	7	12
aof-cand8019	unassigned	24100658	24100866	c	20	2	TCTGCAGTAGATACACACTG	0	0	0	65	0	1	0	0	0	0	0	0	0	0	0	0	0	3	27	11.5	9	4.5	1	4	0	0	0	0	0	2	3	7	3	0	0
aof-cand8022	7	141192672	141192753	c	21	19	TCGAGATGTGAAGGACTTTGT	197	186	136	90	71	148	12	17	23	8	42	72	66	88	172	119	277	224	62	42.5	7	10.5	16	8	41	74	129	80	93	30	10	22	3	23	7
aof-cand8023	5	115011124	115011240	c	21	1	TGATTTTAGGAGAAAACGGTC	96	58	174	60	155	68	6	24	29	17	92	128	66	84	153	43	3732	1548	69	63	88.5	55	16	18	15	29	25	12	14	54	10	24	25	18	26
aof-cand8025	4	7260108	7260279	w	22	16	TGCTTCTTTGATCGATACGTCT	3	0	20	6	62	2	0	23	39	16	16	20	25	31	0	30	29	0	8	19.5	20	24	20	27	23	14	12	15	22	13	6	9	7	7	14
aof-cand8026	3	97928475	97928715	c	21	11	TTAACAGCATTGTCGAAAAGC	32	68	36	27	18	147	166	49	21	12	45	142	104	35	55	39	0	35	14	17	10	16.5	16	8	6	8	5	19	54	8	9	15	13	22	25
aof-cand8027	1	116885880	116886003	c	21	2	TAACTTAAGAATTGGGGAACC	34	27	19	32	15	95	4	18	10	11	3	6	2	4	6	2	4	20	32	13.5	16	11.5	20	5	6	12	3	7	8	7	9	12	7	9	7
aof-cand8029	9	58767349	58767440	c	21	5	TTGGCCGAGACACTCTGGGGT	201	245	240	154	184	152	87	309	585	480	54	87	63	129	145	102	110	151	306	344	353.5	213.5	219	144	123	202	336	450	472	382	261	384	215	139	257
aof-cand8036	1	19323745	19323807	w	21	18	GGCCAAAATGGACGTAGTGTC	87	83	105	69	50	113	6	13	0	0	50	147	100	118	194	166	498	357	329	160	9	9.5	11	1	7	25	4	14	8	7	2	24	23	18	9
aof-cand8038	6	14115393	14115590	w	21	2	ATTAACCTCTTCTTACCCTTC	310	282	249	186	232	429	43	9	3	3	235	183	135	41	85	23	130	131	16	5	1.5	0.5	6	2	8	4	0	2	7	8	12	22	19	23	17
aof-cand8040	5	80757313	80757390	c	21	7	TTGTGGATTCTTCAAATGAGT	124	94	115	44	94	97	83	23	38	46	27	35	32	44	59	58	127	102	105	32.5	31.5	23.5	29	17	43	59	50	48	51	42	22	42	16	10	25
aof-cand8041	8	109829686	109829786	w	21	1	TGTGTATGGACGAGAACCGGC	77	46	63	26	39	109	2	20	16	21	20	16	14	31	22	16	33	29	19	37	31	29	42	19	7	4	3	2	10	11	8	9	4	9	13
aof-cand8044	4	75449529	75449721	w	21	2	CTCTGTAGATGTCGCGATGGA	79	45	30	20	25	13	29	7	16	16	0	0	0	0	0	0	207	183	18	8.5	3.5	2.5	4	2	23	56	32	13	24	16	11	19	11	4	25
aof-cand8045	5	101638106	101638286	w	21	10	TATTAGAGTTAGGTGATTACT	210	152	177	102	59	208	0	8	10	6	26	23	19	27	39	50	37	45	31	23.5	20	7.5	12	7	23	37	17	16	14	25	23	20	27	17	31
aof-cand8047	6	26208580	26208701	c	21	11	TTGGTATCTGGATTGTATAGC	74	109	179	84	104	51	4	28	155	21	30	0	47	65	116	59	127	137	71	69.5	61.5	51	42	52	74	144	114	100	108	68	71	65	47	44	55
aof-cand8049	3	65662302	65662453	w	22	3	TTCCGAGTGAAGAATCGTTGCT	1047	1104	995	1020	2247	1972	23	476	659	359	1653	1474	2093	4	0	3	1350	2263	1001	938	1043	613.5	282	255	564	1161	560	651	613	885	447	552	714	612	887
aof-cand8050	1	30416691	30416862	c	22	4	TTTCCAGACATCTTCGTCAAGC	130	39	87	95	169	377	1386	146	126	64	405	377	500	2385	1092	6177	2063	2	191	100.5	116	107.5	132	90	45	58	24	41	96	39	63	114	50	39	94
aof-cand8051	Unassigned	28570474	28570663	c	21	4	CGAGTTTTCACGTTTGGGCGA	1324	1318	1538	75	0	1329	0	176	605	1	0	0	0	0	0	0	1	419	602	303	200.5	139.5	86	31	297	243	745	59	369	374	1144	1311	421	495	544
aof-cand8058	2	81754788	81754952	c	21	1	TTTAGTCTGATTTAGTAAAAT	37	46	46	40	21	40	10	1	10	2	12	17	9	19	75	42	29	11	48	42.5	46.5	30.5	16	20	20	22	7	10	19	12	10	17	10	12	6
aof-cand8059	10	36879674	36879765	c	21	1	ATTCCGCTCGTTTGACTCTAG	59	51	53	24	54	69	33	215	166	144	20	22	21	55	32	47	35	31	55	34.5	48.5	29	18	18	25	33	47	59	78	98	50	50	25	34	32
aof-cand8061	6	29242211	29242292	w	21	1	AGAATTAGAGGATTGCAAACC	27	3	56	1	0	0	0	0	0	0	0	15	0	17	12	0	0	12	40	46	5	1.5	0	0	1	1	0	0	0	0	0	0	0	0	0
aof-cand8062	1	113528119	113528256	c	22	1	TTGCCTACTCCGCCCATTCCCC	3893	2978	4081	3630	4552	7084	5954	626	659	673	1348	1647	1548	1818	1735	1019	1125	1705	386	451	523.5	658.5	657	677	583	667	330	426	449	378	467	490	425	443	602
aof-cand8063	1	113527941	113528064	c	22	1	TCCCGAAACTCCGCATGCCCAC	923	1095	616	534	747	884	284	417	434	343	229	335	387	446	348	211	94	70	351	454	279	209.5	248	287	227	270	89	139	151	195	541	461	255	901	366
aof-cand8065	7	24481839	24481975	c	21	1	TGCACTTGGTCGCTCAATGAC	24	30	25	22	19	68	4	22	26	11	1	4	5	6	9	7	9	22	9	9.5	11.5	7	4	0	2	4	2	3	7	2	3	9	2	2	3
aof-cand8066	2	12088721	12088876	w	21	1	TGATTTCTAGCTGTCTAACCC	222	213	580	98	2874	45	95	2647	213	358	3876	912	1789	250	1077	73	1517	887	266	188.5	77.5	72.5	16	5	70	94	72	155	116	149	44	68	130	528	172
aof-cand8067	4	142504818	142504971	c	22	1	TTTAGTAAAATTAGTCGTCACT	26	26	23	16	9	25	25	23	16	10	21	50	53	30	25	50	24	29	4	9.5	14.5	8.5	8	7	0	4	5	3	14	10	7	5	4	1	6
aof-cand8068	unassigned	34619578	34619679	c	22	8	TTTGATTATTGGATTGTTGCCT	29	1	1	14	267	90	2	13	54	17	207	176	244	120	139	74	245	113	23	30	42	23	4	5	14	70	52	44	18	62	24	27	50	32	50
aof-cand8070	4	18990563	18990665	c	21	1	TAGGAGTTATTGGATTGGGTT	88	72	51	602	8	9	43	61	34	45	2	1	4	2	2	0	77	25	31	25	28	49	37	14	30	162	152	6	6	11	6	4	7	0	8
aof-cand8071	3	38480915	38481139	c	22	3	TAAGAACTCATGAATAAATGCA	25	29	24	22	35	6	8	3	9	5	52	37	38	24	39	19	32	30	10	25.5	30	23.5	19	9	6	18	16	23	26	18	7	15	9	10	16
aof-cand8072	9	67696405	67696656	c	21	1	TCCTTGTAGATGAGTTGTGCA	153	150	75	115	241	395	129	1043	663	586	47	148	125	183	180	179	58	146	230	170	95	114.5	222	255	162	152	145	239	201	156	124	173	115	85	213
aof-cand8073	1	110392590	110392691	w	21	2	CACGTGACTGTTCCTTTCAAA	148	235	3	72	0	158	37	14	71	85	95	118	93	31	125	141	149	88	57	41	24.5	28.5	25	17	29	16	40	42	29	88	72	144	78	90	81
aof-cand8076	2	59746823	59746911	w	22	1	ATCTCTCTCCCTCAAAGGCTCT	1	1	0	0	2	4	0	0	0	0	0	0	1	0	0	0	5	139	0	0	0	0	0	0	0	0	0	0	0	0	0	0	0	0	0
aof-cand8077	2	59690252	59690360	w	21	4	TATGAATTTCCGCTGTAGTTT	2922	3616	1569	966	1899	799	462	514	1024	509	193	317	216	330	378	412	989	682	631	496.5	480	346	1631	1233	413	548	711	871	1135	929	279	669	853	294	1138
aof-cand8078	4	123264001	123264137	c	21	1	GGGCACCTCGTCATTGGCAGG	23	92	22	26	37	42	4	18	0	24	15	1	8	0	16	0	9	16	6	12.5	6	3	10	1	1	0	0	1	7	0	1	6	1	12	0
aof-cand8080	8	35868195	35868384	c	22	10	CGTTTTCTTGGATTGATAGAGA	2	1	3	1	7	1	2	0	1	0	15	12	17	65	7	50	58	1	3	0.5	1.5	1.5	2	1	0	1	1	2	2	0	0	1	2	0	2
aof-cand8082	8	128682287	128682494	c	21	7	TTGGATCAGTTTCATCAGAAG	178	186	161	138	104	116	60	56	37	41	50	99	60	53	127	104	66	87	63	52.5	45	41.5	120	81	57	106	83	122	113	69	32	63	52	28	107
aof-cand8085	4	49519372	49519452	c	21	10	TTCTAGTAGCATTGCATGGAC	0	0	0	1	0	1	0	0	0	0	2	0	0	0	0	1	512	988	0	0	0.5	0	0	0	0	1	0	0	0	0	0	0	0	0	0
aof-cand8086	5	45141019	45141134	w	21	1	CCAGAACAGATGGTACACCTC	40	42	20	35	76	135	0	44	70	51	4	6	10	26	22	32	9	21	110	95.5	52.5	51.5	13	2	6	6	12	22	24	24	42	60	52	64	71
aof-miR8155a	4	100359277	100359513	w	20	8	GTAACCTGGCTCTGATACCA	164	93	190	148	139	193	73	31	37	43	172	54	140	258	155	66	156	220	174	170.5	214	316	8	63	70	17	55	50	81	65	242	287	579	298	489
aof-miR8155b	9	18987298	18987409	w	21	19	ATCAACCTGGCTCTGATACCA	12	8	11	12	9	13	4	3	5	2	17	6	8	21	14	2	9	16	161	91	136	191.5	1	2	7	1	1	2	0	2	8	7	32	15	15
aof-miR827a	unassigned	8315258	8315365	c	21	2	TTAGATGACCATCAACAAACA	10423	2199	5811	3055	2511	4715	66	43	20	31	697	571	666	122	405	60	199	104	270	38	3.5	2	3	1	34	36	28	103	95	70	222	323	154	89	222
aof-miR828a	4	130243478	130243587	c	22	1	TCTTGCTTAGATGAGTGTTCCT	0	5	0	4	1	23	43	6	3	3	0	0	3	0	0	0	0	0	0	0	0	1.5	8	1	0	0	0	0	0	0	0	0	0	0	0
C. New miRNA candidates identified from the computational filters applied to the 35 Asparagus libraries.
aof-cand8031	1	95008874	95009066	c	22	3	TTCTCATGTTGTTCAGCGGACA	83	71	74	74	107	77	43	39	84	38	76	95	105	83	100	57	84	147	38	37.5	33.5	34.5	15	13	29	59	28	42	45	27	7	12	19	18	27
aof-cand8046	1	108302978	108303212	c	21	3	CCCGAAAGTAGACCACATTGG	51	27	62	20	88	55	184	13	73	33	52	58	39	82	48	79	19	25	253	235	103.5	38.5	27	25	12	25	30	21	47	24	105	155	42	136	59
aof-cand8317	1	123326605	123326722	w	22	1	AGTCGGATTGTTAGGAGTTATC	138	40	171	41	506	46	19	264	53	25	220	106	106	126	195	45	0	0	261	96	34	14	1	1	117	144	46	19	22	128	20	9	42	42	35
aof-cand8337	2	12088720	12088876	w	22	2	TTTCCAAAACCTCCCAATCTAG	4024	2005	3522	2646	8396	2023	8241	267	226	221	5103	4538	4342	3924	4468	2933	2946	4552	784	659	758	726.5	842	377	799	620	155	227	246	337	328	515	362	342	539
aof-cand8024	2	22607638	22607703	w	21	12	CGCTTGGCTGTGGAATGTGAC	226	133	179	92	192	82	6	80	194	88	135	59	157	77	169	71	165	195	353	146.5	72.5	36.5	18	15	179	251	238	156	199	121	53	77	61	27	77
aof-cand8011	2	69160784	69160980	c	21	9	TTCACCCAGATCTTGAAGGCC	144	184	168	92	123	59	2	38	53	18	43	56	21	24	0	0	56	84	187	176	205	161.5	106	48	97	144	38	55	48	69	53	103	72	157	80
aof-cand8330	3	14864437	14864523	c	21	9	TCTATTTTGCTATTTCATGAG	18	10	17	20	0	15	149	2	0	0	76	99	127	8	0	0	19	99	1	3	0.5	1	2	0	1	0	0	0	0	1	3	2	2	0	3
aof-cand8321	3	17134008	17134180	w	21	1	CTAGAAACATGATACCCTTGG	13	43	19	28	24	36	17	32	45	38	7	7	4	11	16	15	3	6	48	34	51	34.5	31	19	17	31	27	37	64	37	19	17	17	12	15
aof-cand8057	3	23070726	23070826	w	21	3	CTAGACTGTCTAACTAGCGCC	47	89	3	312	441	97	0	60	303	129	28	1	20	58	84	48	1	1	55	105	97	25	59	35	90	175	131	91	136	226	2	5	46	3	24
aof-cand8020	3	42393928	42394019	c	21	11	TGGACCATGGATGCAATTTTT	132	88	160	48	190	297	207	264	367	127	65	63	99	81	85	31	107	37	460	173.5	170.5	130	235	241	206	216	187	448	470	279	324	552	438	255	485
aof-cand8060	3	50117465	50117587	w	21	6	TTTATATAAAAATATTGGACC	1	5	1	2	0	9	2	2	1	2	1	1	1	1	0	4	0	0	8	27	35.5	33.5	22	4	0	5	1	0	7	2	4	5	1	6	2
aof-cand8324	3	106320156	106320259	w	22	1	TAATGCTTGCGAGTGATCTGTA	2887	2835	2578	2105	3966	3045	9418	1161	1327	1351	2556	2761	2745	3027	3745	3956	3896	3371	1442	1052.5	1006.5	912.5	1198	1031	695	963	749	1061	1297	777	536	800	548	411	764
aof-cand8081	3	111759806	111759893	w	21	1	TAATCAGAACTATTAACATTC	20	12	17	14	33	26	10	6	9	6	3	2	5	4	0	4	7	6	65	32.5	40	27	41	9	19	13	8	13	14	7	17	34	17	55	25
aof-cand8055	4	68716348	68716425	c	21	11	TTTTTGGAGAACTGCACGGGA	15	33	14	19	34	10	58	26	38	70	16	17	4	9	22	29	15	8	17	24.5	26.5	24	23	5	23	29	30	34	33	8	30	34	10	12	11
aof-cand8053	5	30839113	30839354	w	21	2	ATAAGATTCCTCGATATGCTC	40	42	29	30	43	40	8	14	11	14	65	37	43	18	39	23	19	10	226	110	88	40.5	87	47	24	41	14	29	37	37	42	96	98	100	45
aof-cand8039	5	59194227	59194440	w	21	6	AAAGAGACCCCTTGTAGTTCT	3	8	8	2	47	19	6	38	171	46	1	1	40	41	59	1	49	63	26	12	12.5	22	7	14	29	22	14	13	6	10	3	0	11	31	27
aof-cand8326	5	73626343	73626520	w	21	1	TATCAGGATTCGTGCTAGACC	517	804	580	469	1091	967	5763	1441	1833	1227	175	132	144	111	173	73	217	221	198	195.5	92	107	132	115	196	372	432	653	774	221	162	313	162	242	249
aof-cand8054	5	81351717	81351793	w	22	6	CCATCACTGTGTAACCACCGCT	7	8	19	6	24	2	0	3	31	9	3	0	3	4	7	7	12	10	21	14.5	21.5	15	9	7	27	39	49	57	39	19	36	26	20	13	25
aof-cand8042	5	85447418	85447653	c	21	1	TAACGAAATGGATTATCGGTC	68579	78728	56369	39848	75049	51419	50252	12999	15772	8100	24327	31708	28129	26074	30625	38082	44523	32096	17318	19868.5	17164	18364	32899	17249	9855	12049	10246	13575	20445	6555	5704	12095	7016	13553	9660
aof-cand8030	5	101090060	101090187	w	21	1	TCTTGCTGAACTTTTCCCACT	7	18	5	2	5	21	14	38	31	57	0	3	1	5	3	4	1	3	3	8	7	12.5	14	12	6	11	8	16	22	6	10	16	1	6	13
aof-cand8043	5	109866700	109866851	w	21	11	ATTTCAACGATTTGAGGGACT	26	14	23	9	14	39	0	52	4	8	2	1	0	1	6	0	1	0	19	6	2	1	0	1	0	1	1	3	0	0	1	5	2	0	0
aof-cand8034	5	111403006	111403107	w	22	6	TCTTTGAGCCTCTACAATATTT	0	0	0	0	0	10	0	0	0	1	0	0	0	0	0	1	0	0	0	0	1	6	601	520	0	0	0	1	4	0	0	0	0	0	0
aof-cand8320	6	3147730	3147865	c	21	1	CGCCGAGGTCATTTGACAATG	158	0	0	62	0	439	0	0	0	0	1	1150	463	851	1521	655	487	319	494	161	0	0	0	0	0	0	0	0	0	92	146	174	138	29	107
aof-cand8075	6	4397620	4397775	c	21	1	TATCCAATGGTCTCGGTCTAT	8	11	13	10	30	63	4	112	144	208	1	6	3	1	9	3	9	9	9	5	4	9.5	29	24	14	29	17	21	29	27	20	32	11	45	14
aof-cand8021	6	29663121	29663225	w	21	1	TACTGAGCCAAAAGATAAAAG	9	17	13	15	5	26	0	11	21	9	1	1	2	4	9	4	3	0	14	23	20	34.5	89	60	12	21	11	19	17	15	38	50	15	9	13
aof-cand8048	6	40331614	40331724	c	21	3	TTGTAGAATTTAGTTAGAGAC	2968	0	38	2284	0	661	6	1241	1285	607	12669	10935	11845	6877	0	0	0	0	972	787	1073	800	629	747	409	933	693	492	1212	2	1133	1421	2	6	0
aof-cand8014	6	41711915	41712090	c	22	6	TATACAGAGATTGATTGACCTC	152	299	5	468	0	173	2	43	113	42	0	0	0	0	0	0	431	1080	251	200.5	199	169.5	164	124	293	420	250	192	289	659	280	288	675	163	937
aof-cand8013	6	65295275	65295531	c	22	1	TGACAACTGTAGTTATCCTCGT	270	350	280	270	321	202	547	154	202	144	263	270	310	206	462	259	526	485	239	289.5	284.5	271.5	241	201	213	432	225	417	454	271	122	152	162	156	224
aof-cand8069	7	35822438	35822679	w	21	2	TATTGAGGTGATGACTGGGGA	0	0	7	9	0	103	4	37	34	78	0	0	0	6	11	29	3	1	0	9.5	15.5	18.5	25	17	9	4	8	48	13	1	3	6	4	20	13
aof-cand8032	8	73176154	73176351	w	22	1	TTCCAAGGAGAGAGGATCTGAT	48	119	47	27	0	44	0	6	90	46	159	173	237	0	0	0	0	0	14	36	54.5	101.5	59	52	12	129	72	66	60	35	0	0	8	60	0
aof-cand8332	8	106012232	106012358	w	22	1	TGCATCAGAAGTCGTGATAGGC	85	60	58	32	32	70	4	130	57	37	20	35	36	43	43	46	58	79	95	67	53.5	39	255	203	23	18	22	17	22	36	12	20	33	12	22
aof-cand8033	8	107071416	107071515	c	21	7	CGTGTCACTATCAGATAGCCT	9	12	27	12	8	13	0	1	17	0	1	0	2	4	5	6	5	8	11	5.5	10	5	3	4	9	14	7	21	8	13	51	36	19	38	22
aof-cand8074	9	43069840	43070015	c	21	6	TCTCTCCCACTGTGGTCGCCA	19	16	29	28	18	34	19	31	60	74	26	14	14	39	27	13	31	39	83	78	90.5	130	46	190	134	54	46	58	76	54	95	103	155	183	149
aof-cand8325	10	1987808	1988000	w	21	1	TAGTGGAGAGAACATAGCAAC	216	1864	200	429	79	122	25	48	78	91	68	200	85	72	410	399	47	121	191	1073.5	1552	1831.5	210	210	530	1003	1044	1717	2256	758	455	698	540	390	618
aof-cand8336	10	5961166	5961269	c	21	5	TGTGGAATCTGAGCCTTTGCT	718	622	511	414	609	963	359	1352	1166	724	168	204	244	332	325	297	181	146	834	444.5	371.5	228	222	216	417	533	532	560	655	641	445	512	344	400	377
aof-cand8009	10	11349851	11349940	w	21	5	TATCTGCTTCAGTGGCCTTCC	0	39	0	4	0	0	0	0	0	0	0	3	0	0	1	6	0	0	0	30	22.5	24	33	21	0	0	0	0	1	0	0	0	0	0	0
aof-cand8035	10	32084060	32084176	w	21	1	TACATGTCTCAAATCACCCGG	19	83	17	36	4	14	6	37	8	33	2	7	5	6	16	10	4	30	32	112.5	259	1009	11354	5032	9	17	9	6	24	12	13	10	7	12	13
aof-cand8328	10	36352404	36352535	c	21	3	TCCGCGCTGTATAAGTCTACG	6	0	13	9	9	30	104	18	5	9	3	4	2	7	7	32	50	10	4	6	4	5	12	13	6	16	1	1	6	1	2	5	0	0	0
aof-cand8010	10	52822250	52822369	c	21	6	ATGGGCTTGAATATAAATTGC	24	31	27	24	16	23	14	28	29	38	7	11	6	8	20	22	7	17	33	54.5	76	85	83	106	43	37	16	22	46	22	15	17	10	8	13
a Members with ".tx" are truncated and/or tailed isoforms of known miRNA families
b Number of loci in the Asparagus genome to which mature miRNA seqeunce can be mapped with no mismatches

## Sheet: S3. 21- and 22-PHAS loci
Table S3. 21- and 22-nt PHAS loci identified in the Asparagus genome (n=29)
Total abundance includes six vegetative samples from leaf, root and shoot and 29 distinct reproductive samples or stages for flowers, spears, anthers, pistils.
Missing entries in the "overlapping.gene.model" and "overlapping.gene.annotation" columns indicates that the PHAS locus was in an unannotated, intergenic region.
Part A. 21-nt PHAS loci identified in Asparagus
PHAS identifier	chr	start	end	overlapping gene model	overlapping gene annotation	Total abundance (vegetative)	Total abundance (reproductive)	miRNA trigger
21-PHAS-1	chr1	115159644	115159851	-	-	952	1419	-
21-PHAS-2	chr10	4918429	4918510	evm.model.AsparagusV1_10.332-ac14074/f1p0/684.mrna1	-	13	9342	miR2118
21-PHAS-3	chr10	63643897	63644083	evm.model.AsparagusV1_10.1545	mrna-decapping enzyme-like protein	3024	294100	-
21-PHAS-4	chr10	63647363	63647570	evm.model.AsparagusV1_10.1545	mrna-decapping enzyme-like protein	2631	278779	-
21-PHAS-5	chr10	63649983	63650169	evm.model.AsparagusV1_10.1545	mrna-decapping enzyme-like protein	3039	294632	-
21-PHAS-6	chr10	69355256	69355589	ac12978/f5p1/703	-	7103	22552	-
21-PHAS-7	chr11	69485895	69486186	-	-	12902	139899	miR2118
21-PHAS-8	chr2	11176977	11177247	evm.model.AsparagusV1_02.595-cc12027/f1p9/2291.mrna1	protein suppressor of gene silencing 3-like	478	329	-
21-PHAS-9	chr3	103616530	103616758	cc51233/f1p0/665.mrna1	-	10833	119151	miR2118
21-PHAS-10	chr3	103643571	103643799	cc51233/f1p0/665.mrna1	kinase family protein	11687	129233	miR2118
21-PHAS-11	chr4	2484093	2484321	bc46911/f1p0/1440.mrna1	cytochrome p450 cyp736a12-like	33579	166190	miR2118
21-PHAS-12	chr4	11950207	11950435	-	CC-NBS-LRR/disease resistance protein (cc-nbs-lrr)	9294	24256	miR2118
21-PHAS-13	chr4	12318276	12318609	bc33105/f1p0/2135.mrna1-ac37891/f1p0/619.mrna1-ac14929/f1p0/725.mrna1	CC-NBS-LRR/disease resistance protein (cc-nbs-lrr)	2683	1477	miR2118
21-PHAS-14	chr4	12341174	12341360	evm.model.AsparagusV1_04.492	CC-NBS-LRR/disease resistance protein (cc-nbs-lrr)	4036	5212	miR2118
21-PHAS-15	chr5	7060097	7060618	cc26113/f1p1/2227.mrna1	disease resistance rpp13-like protein 1	75782	197499	miR2118
21-PHAS-16	chr5	11612551	11612758	ac24076/f1p1/1049.mrna1	-	0	578	miR2118
21-PHAS-17	chr5	14627302	14627509	evm.model.AsparagusV1_05.568-cc14137/f1p1/2716.mrna1	receptor-like protein kinase feronia	848	3276	miR2118
21-PHAS-18	chr5	110210663	110210807	evm.model.AsparagusV1_05.2720-cc7678/f1p3/2414.mrna1	rna-dependent rna polymerase 6	86	358	-
21-PHAS-19	chr6	13651294	13651354	evm.model.AsparagusV1_06.666	disease resistance protein rga4-like isoform x1	609	928	-
21-PHAS-20	chr6	40905910	40906138	evm.model.AsparagusV1_06.1325	-	18273	52100	-
21-PHAS-21	chr6	41013408	41013616	evm.model.AsparagusV1_06.1328	f-box kelch-repeat protein skip30	3107	6048	-
21-PHAS-22	chr6	46960024	46960189	evm.model.AsparagusV1_06.1434	hypothetical protein 18.t00024	432	5708	-
21-PHAS-23	chr6	75150116	75150302	evm.model.AsparagusV1_06.1907-ac38967/f1p0/644.mrna1	auxin response factor 6 isoform 2	306	371	miR167
21-PHAS-24	chr8	116413500	116413791	-	-	0	14071	miR2118
21-PHAS-25	chr8	121104786	121104930	evm.model.AsparagusV1_08.3145-bc51711/f1p0/1420.mrna1	pro-cathepsin h	26104	173069	miR2118
21-PHAS-26	chr8	123277383	123277548	bc27989/f1p1/1381	-	40144	150216	miR390
21-PHAS-27	chr9	3699010	3699238	-	-	5809	14627	miR2118
21-PHAS-28	chr9	4536201	4536471	evm.model.AsparagusV1_09.297	ring finger and chy zinc finger domain-containing protein 1 isoform x2	272	5115	-
21-PHAS-29	chr9	17732998	17733226	cc13874/f1p7/3076.mrna1, cc24832/f1p4/3175.mrna1,cc6984/f1p6/2994.mrna1	kinesin-like protein kif22	480	3532	-
Part B. Weakly phased 22-nt loci found at PARE-validated miR2275 target sites
PHAS identifier	chr	start	end	overlapping gene model	overlapping gene annotation	Total abundance vegetative	Total abundance reproductive	miRNA trigger
22-PHAS-1	chr1	8760313	8760552	-	-	9	35634	miR2275
22-PHAS-2	chr10	4918330	4918688	-	-	14	8307	miR2275
22-PHAS-3	chr10	33284312	33284551	-	-	0	8403	miR2275 cleavage site matches P4 start site

## Sheet: S4. 24-PHAS loci
Table S4. Clusters of 24-PHAS loci identified in Asparagus (n = 42 clusters, for 63 loci)
Total abundance includes six vegetative samples from leaf, root and shoot and 29 distinct reproductive samples or stages for flowers, spears, anthers, pistils.
Missing information in the "overlapping gene model" and "overlapping gene annotation" columns indicates that the PHAS locus was located in an unannotated, intergenic region.
Phased loci that were found to generate phasiRNAs in data from pistils are presented in "Phased in pistil" column, in which "Y" denotes their presence and "N" denotes their absence from male reproductive samples.
Gene models names beginning with "evm-" are those predicted using the genome, while other are transcripts identified using SMRT-seq (full-length cDNAs).
PHAS identifier	Chr	Start	End	Overlapping gene model	Overlapping gene annotation	Total abundance (vegetative)	Total abundance (reproductive)	miRNA trigger	Phased in pistil
24-PHAS-1	1	6568136	6569634	evm.model.AsparagusV1_01.345,cc2180/f2p1/2213.mrna1	Factor of DNA methylation 1, Exocyst complex component EXO70A1	1950	186884	-	Y
24-PHAS-2	1	6571759	6572878	-	-	1400	109650	-	Y
24-PHAS-3	1	6574774	6576011	-	-	718	124251	-	Y
24-PHAS-4	1	20046490	20046751	-	-	169	2672	-	N
24-PHAS-5	1	38470556	38470817	-	-	950	76635	-	N
24-PHAS-6	1	55192459	55192672	-	-	310	48304	-	N
24-PHAS-7	1	101060266	101060981	-	-	634	163971	-	Y
24-PHAS-8	2	1425064	1425692	-	-	257	9937	-	N
24-PHAS-9	2	6306712	6306973	-	-	921	143449	-	N
24-PHAS-10	2	9748054	9748916	-	-	200	72905	-	Y
24-PHAS-11	2	9749284	9750601	-	-	661	240429	-	Y
24-PHAS-12	3	5320983	5321624	-	-	2702	432474	-	N
24-PHAS-14	3	46983279	46984401	-	-	1242	102313	-	Y
24-PHAS-15	3	52655783	52657245	-	-	2132	322970	-	Y
24-PHAS-16	4	66548473	66549253	-	-	510	55984	-	N
24-PHAS-17	4	69270754	69271015	-	-	1992	110331	-	N
24-PHAS-18	4	72165588	72165970	-	-	765	14566	-	Y
24-PHAS-19	5	124487784	124488045	-	-	345	72624	-	Y
24-PHAS-20	6	1602984	1603508	-	-	857	155524	-	Y
24-PHAS-21	6	1607274	1607415	-	-	126	32032	-	N
24-PHAS-22	6	3058075	3060796	-	-	1226	790066	-	Y
24-PHAS-23	6	27326817	27328745	-	-	2243	672301	-	Y
24-PHAS-24	6	31739176	31739796	-	-	335	14647	-	N
24-PHAS-25	6	43997179	43997440	-	-	3486	1548978	-	N
24-PHAS-26	7	4346073	4346646	-	-	2184	960122	-	Y
24-PHAS-28	7	38633968	38634658	-	-	337	42590	-	Y
24-PHAS-29	7	111805450	111806734	-	-	2969	26725	-	N
24-PHAS-30	7	137650557	137650842	-	-	120	22079	-	Y
24-PHAS-31	8	6666344	6668535	-	-	749	195844	-	N
24-PHAS-32	8	6678343	6680485	-	-	457	184865	-	N
24-PHAS-33	8	107939180	107939441	-	-	983	18792	-	N
24-PHAS-34	8	108256607	108256868	-	-	414	15130	-	N
24-PHAS-35	9	5792895	5793252	-	-	106	24043	-	Y
24-PHAS-36	9	5797790	5798385	-	-	756	137247	-	Y
24-PHAS-37	10	1987928	1988261	-	-	1124	4864049	-	N
24-PHAS-38	10	4256020	4256233	evm.model.AsparagusV1_10.295	WAT1-related protein	1463	261408	-	N
24-PHAS-39	10	14035919	14036180	-	-	431	42663	-	N
24-PHAS-40	10	23957312	23957573	-	-	165	11842	-	Y
24-PHAS-41	11	4266310	4266499	-	-	123	3346	-	N
24-PHAS-42	11	14402054	14402315	-	-	477	44955	-	Y
24-PHAS-43	11	71422794	71423007	-	-	914	295700	-	N
24-PHAS-44	11	87060294	87060411	-	-	262	26998	-	Y

## Sheet: S5. 24-PHAS genomic overlap
Table S5. Summary of enrichment or depletion of overlap of 24-PHAS loci from rice, Asparagus and maize, with exons, introns, transposons and inverted repeats, versus random chance
Part A. Summary of 24-PHAS overlap in Asparagus
Genomic Feature	Total nucleotides for feature	Expected overlapping nucleotides (log2)	Overlapping nucleotides (log2)	Enrichment or depletion of overlapa
Exon	31990512	9.16236	9.83447	0.672107
Intron	244765787	12.098	12.4836	0.385514
Intergenic	2048883047	15.1634	13.9902	-1.17322
Transposon	704773892	13.6238	9.91886	-3.70494
Inverted repeats	13227373	7.88825	13.717	5.82879
Part B. Summary of 24-PHAS overlap in maize
Genomic Feature	Total nucleotides for feature	Expected overlapping nucleotides (log2)	Overlapping nucleotides (log2)	Enrichment or depletion of overlapa
Exon	91456144	14.1851	10.9403	-3.24482
Intron	71914174	13.8383	11.9538	-1.8845
Intergenic	584364354	16.8609	16.2157	-0.645112
Transposon	140410133	14.8036	13.2014	-1.60227
Inverted repeats	2937926	9.22493	8.71425	-0.510682
Part C. Summary of 24-PHAS overlap in rice
Genomic Feature	Total nucleotides for feature	Expected overlapping nucleotides (log2)	Overlapping nucleotides (log2)	Enrichment or depletion of overlapa
Exon	99590071	12.3594	14.6552	2.29584
Intron	136400328	12.8131	12.4049	-0.408256
Intergenic	3885889743	17.6455	16.6078	-1.03769
Transposon	1550545958	16.32	13.4345	-2.88549
Inverted repeats	29572711	10.6076	8.67596	-1.93167
aNegativevalues represent a depletion and positive values an enrichment of overlap with genomic feature, compared to random chance.

## Sheet: S6. Structure scores
Table S6. Structure and strand-specificity scores from RNA secondary struture analysis.
Structure scores are generalized log ratio (glog) of normalized dsRNA-seq to normalized ssRNA-seq read abundances.
Strand-specificity scores are generalized log ratio (glog) of normalized sense versus normalized antisense read abundances.
Loci with statistically reliable coverage in dsRNA-seq data are presented here. See methods for more details.
Representative set of hc-RNA clusters were picked randomly from the genome-wide set, and those with reliable coverage in dsRNA-seq data are presented here. See methods for more details.
Name	locus typea	strand score (log2)	structure score (log2)
TAS3	T	4.06	4.4
21-PHAS-10	P	3.7	0.51
24-PHAS-11	P	3.16	3.36
24-PHAS-14	P	2.62	3.46
24-PHAS-17	P	4.25	5.52
24-PHAS-18	P	4.01	3.55
24-PHAS-19	P	1.83	3.87
24-PHAS-22	P	2.97	4.72
24-PHAS-24	P	3.34	2.89
24-PHAS-28	P	0.22	3.73
24-PHAS-29	P	4.22	4.56
24-PHAS-32	P	0	3.46
24-PHAS-33	P	2.08	2.89
24-PHAS-34	P	0	6.27
24-PHAS-35	P	0.09	4.98
24-PHAS-39	P	3.07	3.92
24-PHAS-40	P	3.18	4.03
24-PHAS-41	P	3.28	2.4
24-PHAS-42	P	2.06	7.85
24-PHAS-43	P	2.08	3.6
24-PHAS-44	P	1.3	4.41
24-PHAS-5	P	4.94	6.55
24-PHAS-6	P	3.84	2.4
24-PHAS-7	P	0	3.78
24-PHAS-9	P	3.02	3.94
aof-miR166a	M	4.56	5.41
aof-miR168a	M	4.81	2.86
aof-miR2118d	M	4.22	2.89
aof-miR319a	M	3.52	4.38
hc-cluster-107211	C	0.22	3.73
hc-cluster-124702	C	0.84	3.54
hc-cluster-130913	C	1.79	5.21
hc-cluster-146224	C	0.7	4.01
hc-cluster-171546	C	0.79	4.79
hc-cluster-190235	C	1.4	3.92
hc-cluster-196606	C	0.44	4.61
hc-cluster-206217	C	0.37	5.07
hc-cluster-216955	C	1.37	5.18
hc-cluster-217399	C	3.67	4.99
hc-cluster-290527	C	1.08	4.28
hc-cluster-322920	C	0.42	3.38
hc-cluster-330282	C	0.45	4.15
hc-cluster-4038	C	0.28	4.42
hc-cluster-450002	C	0.13	4.42
hc-cluster-471130	C	0.46	3.21
hc-cluster-544234	C	1.95	3.64
hc-cluster-559783	C	0.27	2.89
hc-cluster-574840	C	1	3.5
hc-cluster-657433	C	0.07	3.41
hc-cluster-662473	C	0.99	4.87
hc-cluster-664263	C	1.63	6.38
hc-cluster-672960	C	0.03	6.28
hc-cluster-78817	C	1.7	3.74
a "P" represents PHAS loci, "M" represents miRNAs, "C" represents hc RNA clusters included as a control, and "T" represents a TAS3 locus.
