# Supplementary material for: Plant 24-nt reproductive phasiRNAs from intramolecular duplex mRNAs in diverse monocots
Source: HighWire-hosted journal article supplement (doi:10.1101/gr.228163.117), 2018-07-12
Supplement: Supplemental_Tables_S7_to_S16.xlsx [file Supplemental_Tables_S7_to_S16.xlsx]

## Sheet: S7. LA and DL sRNA Libraries
Table S7. Summary statistics of daylily and lily sequencing libraries used in this analysis.
Statistics for genome-matched reads could not be determined because sequenced genomes for both lily and daylily are not available yet
Part A. Daylily small RNA data
Code	Title	Total Sequences	Genome Matched Readsa	Distinct Genome Matched Readsa	Len. of Reads	Technology	GEO Accession Number
Daylily_leaf_1	Daylily leaf rep1, BM14-01	39246683	n/a	n/a	34	single-end	GSM3083872
Daylily_wbud	Daylily, whole bud, no sepals, with <1.0 mm anthers, BM14-180	37627819	n/a	n/a	34	single-end	GSM3083873
Daylily_01mm	Daylily, <1.0 mm anthers, BM14-177	52380062	n/a	n/a	34	single-end	GSM3083874
Daylily_02mm	Daylily, 1.5-2.0 mm anthers, BM14-178	30544192	n/a	n/a	34	single-end	GSM3083875
Daylily_03mm	Daylily, 2.5-3.0 mm anthers, BM14-179	41155375	n/a	n/a	34	single-end	GSM3083876
Daylily_ant_0_r1	Daylily 3.3mm anther stage 0 rep1, BM14-04	48546267	n/a	n/a	34	single-end	GSM3083877
Daylily_ant_1_r1	Daylily 4.1mm anther stage 1 rep1, BM14-08	45773743	n/a	n/a	34	single-end	GSM3083878
Daylily_ant_2_r1	Daylily 5.8mm anther stage 2 rep1, BM14-12	32982067	n/a	n/a	34	single-end	GSM3083879
Daylily_fem_0_r1	Daylily pistil stage 0 rep1, BM14-06	45534573	n/a	n/a	34	single-end	GSM3083880
Daylily_fem_1_r1	Daylily pistil stage 1 rep1, BM14-10	50177784	n/a	n/a	34	single-end	GSM3083881
Daylily_fem_2_r1	Daylily pistil stage 2 rep1, BM14-14	35155630	n/a	n/a	34	single-end	GSM3083882
Daylily_fem_3_r1	Daylily pistil stage 3 rep1, BM14-18	68247257	n/a	n/a	34	single-end	GSM3083883
Daylily_fem_4_r1	Daylily pistil stage 4 rep1, BM14-22	55651517	n/a	n/a	34	single-end	GSM3083884
Part B. Lilium small RNA data
Code	Title	Total Sequences	Genome Matched Readsa	Distinct Genome Matched Readsa	Len. of Reads	Technology	GEO Accession Number
Lilium_leaf	Lilium maculatum leaf, BM14-190	27227974	n/a	n/a	34	single-end	GSM2584529
Lilium_4mm_an	Lilium maculatum L-4, 4 mm anthers, BM14-191	35477763	n/a	n/a	34	single-end	GSM2584531
Lilium_5mm_an	Lilium maculatum L-5, 5 mm anthers, BM14-192	32039303	n/a	n/a	34	single-end	GSM2584533
Lilium_6mm_an	Lilium maculatum L-6, 6 mm anthers, BM14-193	32024530	n/a	n/a	34	single-end	GSM2584535
Lilium_8mm_an	Lilium maculatum L-8, 8 mm anthers, BM14-195	32594126	n/a	n/a	34	single-end	GSM2584537
Lilium_10mm_an	Lilium maculatum L-10, 10 mm anthers, BM14-197	33533618	n/a	n/a	34	single-end	GSM2584539
Part C. Daylily RNA-seq data
Code	Title	Total Sequencesb	Genome Matched Readsa	Distinct Genome Matched Readsa	Len. of Reads	Technology	GEO Accession Number
Daylily_leafr	Daylily leaf rep1, BM14-01	42572707	n/a	n/a	100	single-end	GSM3083885
Daylily_01mmr	Daylily, <1.0 mm anthers, BM14-177	29999859	n/a	n/a	100	single-end	GSM3083889
Daylily_02mmr	Daylily, 1.5-2.0 mm anthers, BM14-178	27877362	n/a	n/a	100	single-end	GSM3083890
Daylily_03mmr	Daylily, 2.5-3.0 mm anthers, BM14-179	37901322	n/a	n/a	100	single-end	GSM3083891
Daylily_wbudr	Daylily, whole bud, no sepals, with <1.0 mm anthers, BM14-180	38943956	n/a	n/a	100	single-end	GSM3083887
Daylily_le	Daylily leaf rep1, BM14-01	33520975	n/a	n/a	150	paired-end	GSM3083886
Daylily_01	Daylily, <1.0 mm anthers, BM14-177	33705644	n/a	n/a	150	paired-end	GSM3083889
Daylily_02	Daylily, 1.5-2.0 mm anthers, BM14-178	29568897	n/a	n/a	150	paired-end	GSM3083890
Daylily_03	Daylily, 2.5-3.0 mm anthers, BM14-179	30750435	n/a	n/a	150	paired-end	GSM3083891
Daylily_wb	Daylily, whole bud, no sepals, with <1.0 mm anthers, BM14-180	31514569	n/a	n/a	150	paired-end	GSM3083888
Part D. Lilium RNA-seq data
Code	Title	Total Sequencesb	Genome Matched Reads	Distinct Genome Matched Reads	Len. of Reads	Technology	GEO Accession Number
Lilium_leaf	Lilium maculatum leaf, BM14-190	68250144	n/a	n/a	150	paired-end	GSM2584531
Lilium_4mm_an	Lilium maculatum L-4, 4 mm anthers, BM14-191	70492722	n/a	n/a	150	paired-end	GSM2584532
Lilium_5mm_an	Lilium maculatum L-5, 5 mm anthers, BM14-192	67997742	n/a	n/a	150	paired-end	GSM2584534
Lilium_6mm_an	Lilium maculatum L-6, 6 mm anthers, BM14-193	62509328	n/a	n/a	150	paired-end	GSM2584536
Lilium_8mm_an	Lilium maculatum L-8, 8 mm anthers, BM14-195	66675362	n/a	n/a	150	paired-end	GSM2584538
Lilium_10mm_an	Lilium maculatum L-10, 10 mm anthers, BM14-197	68302075	n/a	n/a	150	paired-end	GSM2584540
Part E. Daylily PacBio "SMRT" data
Code	Title	Total Sequences	Full-lengthc	high-quality transcriptsd	Average Len. of Reads	Technology	GEO Accession Number
DayLily-A-1KB	Daylily, 0.5-1.0mm anther, <2kb insert length (3 SMRT cells)	232523	114207	35542	1066	SMRT-seq	GSM3083895
DayLily-C-2-3KB	Daylily, 0.5-1.0mm anther, 2-3 kb insert length (3 SMRT cells)	290648	77874	8436	3760	SMRT-seq	GSM3083897
DayLily-B-3KB-above	Daylily, 0.5-1.0mm anther, >3 kb insert length (3 SMRT cells )	212767	132798	38539	2207	SMRT-seq	GSM3083896
aGenome-matched reads not available due to absence of sequenced genomes for Lilium and daylily
bNumber of read pairs listed for paired-end data.
cFull-length non chimeric isoforms
dPolished (corrected) high-quality consensus transcripts

## Sheet: S8. LA and DL miRNAs
Table S8. Members of the miR2118 and miR2275 families identified in lily and daylily, based on sequence similarity to annotations in miRBase version 21.
Small RNA data from five developmental stages of anthers in lily, and 12 developmental stages corresponding to anther and pistils from daylily, along with leaf samples, were used to identify these candidate miRNAs.
Part A. miR2118 and miR2275 members in lily
		Abundances at different sampled stages
Names	Veg	Pre-Meiotic	Meiotic	Post-Meiotic	Post-Meiotic-II	Total Abundance	Sequence	Length
LA-miR2275.1	0	22	26	8	10	66	TTCAATTTCCTCCGATATCTTA	22
LA-miR2275.2	0	8	21	8	3	40	TTCAATTTCCTCTGATATCTCT	22
LA-miR2275.3	0	9.5	21	0	0	30.5	TTTGGTTTCCTCCAATATCTTA	22
LA-miR2275.4	1	360.5	223	167	199	950.5	TTCAGTTTCCTCTAATATCTTA	22
LA-miR2275.5	0	87	93	49	35	264	TTCAATTTCCTCCAATATCTAA	22
LA-miR2275.6	0	69.5	73	49	35	226.5	TTCAATTTCCTCCAATATCTTA	22
LA-miR2275.7	0	20	36	24	3	83	TTCAATTTCCTCCGGTATCTTA	22
LA-miR2275.8	0	37	31	29	7	104	TTCAATTTCCTCTGATATCTAA	22
LA-miR2275.9	1	4206	5128	3072	2416	14823	TTCAATTTCCTCTGATATCTTA	22
LA-miR2275.10	0	81.5	78	37	70	266.5	TTCAATTTCCTCTGATATCTTT	22
LA-miR2275.11	0	12	16	20	10	58	TTCAATTTTCTCCGATATCTAG	22
LA-miR2275.12	0	11	10	4	3	28	TTCAGTTTCCTCTAATATTTTT	22
LA-miR2275.13	0	46.5	41	12	17	116.5	TTCAGTTTCCTCCGATATCTTA	22
LA-miR2275.14	0	74.5	150	69	38	331.5	TTTAGTTTCCTCTAATATCTTA	22
LA-miR2275.15	0	94.5	83	33	59	269.5	TTCGGTTTCCTCCAATATCTTA	22
LA-miR2275.16	0	74.5	150	69	38	269.5	TTCGGTTTCCTCCAATATCTTA	22
LA-miR2275.17	0	94.5	83	33	59	331.5	TTTAGTTTCCTCTAATATCTTA	22
LA-miR2275.18	0	6	0	0	0	6	TTTGGTTTCCTCCAATATCTCA	22
LA-miR2118.1	0	169.5	114	94	98	475.5	TTCCCAATGCCTCTCATGCCAA	22
Part B. miR2118 and miR2275 members in daylily
		Abundances at different sampled stages
Names	Veg	Pre-Meiotic	Meiotic	Post-Meiotic	Post-Meiotic-II	Total Abundance	Sequence	Length
HL-miR2275.1	0	116.5	196	69.5	40	422	TTTGATTTCCTCCAATATCTCA	22
HL-miR2275.2	0	25.5	53	19.5	5	103	TTTGATTTTCTCCAATATCTCA	22
HL-miR2275.3	0	78	260	105.5	53	496.5	TTTAGTTTCCTCCAATATCTCA	22
HL-miR2118.1	1	328.5	345	138	48.5	860	TTTCCAATGCCTTCCATTCCAT	22

## Sheet: S9. Zostera, Amborella data
Table S9. Mature small RNA seqeunces annotated as miR2118 and miR2275 family members in Zostera and Amborella
Publicly available small RNA libraries were used for Zostera and Amborella. No miR2275 family member was identified in Zostera, based on the sequence similarity to mature miR2275 from miRBase (v21).
Part A. Amborella small RNA data (Albert et al. 2013)
Code	Title	Total Sequences	Genome Matched Reads	Distinct Genome Matched Reads	Len. of Reads	Technology	GEO Accession Number
AmOFFs_1	sRNA library from Amborella opened female flowers, rep 1	25781233	19438501	2685317	18-34	single-end	GSM1024601
AmLeas_1	sRNA library from Amborella leaf rep 1.	18092450	11814047	656968	18-34	single-end	GSM1024602
Part B. Zostera small RNA data (Olsen et al. 2016)
Code	Title	Total Sequences	Genome Matched Reads	Distinct Genome Matched Reads	Len. of Reads	Technology	PubMed ID
Zost_veg1	Vegetative tissue, rep1, Zostera, BM14-175	39319867	6268788	1298538	18-34	single-end	PMID: 26814964
Zost_veg2	Vegetative tissue, rep2, Zostera, BM14-176	33618017	2153039	323703	18-34	single-end	PMID: 26814964
Zost_flo_pre1	P1 (Pre-meiosis), Zostera, BM14-170	43903144	35909432	7968962	18-34	single-end	PMID: 26814964
Zost_flo_pre2	P2 (Pre-meiosis), Zostera, BM14-171	43772929	34041409	9392073	18-34	single-end	PMID: 26814964
Zost_flo_mid	F1 (Middle stage), Zostera, BM14-172	21037045	14004696	4405337	18-34	single-end	PMID: 26814964
Zost_flo_pos1	M1 (Post-meiosis), Zostera, BM14-173	19110423	9584623	2624440	18-34	single-end	PMID: 26814964
Zost_flo_pos2	M2 (Post-meiosis), Zostera, BM14-174	17816494	8490365	2515794	18-34	single-end	PMID: 26814964
Part C. miR2118 and miR2275 family members in Amborella
Annotation	Total abundance vegetative	Total abundance reproductive	Hits	sequences	Len
miR2118_1	9	6	n/a	TTCCCAATGACTCCCATTCCTG	22
miR2118_2	0	6	n/a	TTCCTAATGCCTCCCATTCCTA	22
miR2118_3	25	33	n/a	TTCCCGATGCCGCCCATGCCAT	22
miR2275_1	44	12	n/a	CTTGGTTTCCTCCAATTTCTCA	22
miR2275_2	1	6	n/a	TTCAGTTTCCTCTAATATCTCA	22
Part D. miR2118 family members in Zostera
Annotation	Total abundance vegetative	Total abundance reproductive	Hits	sequences	Len
miR2118_1	4	10	n/a	TTCCCGATGCCTCCCATTCCTA	22

## Sheet: S10. LA and DL PHAS tallies
Table S10. Tallies of 21- and 24-PHAS transcripts in lily and daylily
For a complete list of the collapsed set, see Tables S11 and S13 for lily 21 and 24-PHAS loci, respectively, and Table S12 for daylily 21- and 24-PHAS loci.
See methods for criterias, their cutoffs and additional filters that were used to classify transcripts into coding , non-coding and transcripts of unknown potential
		Total	Coding	Non-coding	Transcripts of unknown potential
Lily	24-PHAS	3394	19	3366	9
	21-PHAS	92	8	81	3
Daylily	24-PHAS	245	17	214	14
	21-PHAS	2	1	1	0

## Sheet: S11. LA 21-PHAS
Table S11. Summary of 21-PHAS precursors identified in lily
In coding status column,"nc" means precursors is a non-coding RNA, "co" means precursors has significant coding potential and "up" means that coding potential could not be determined with confidence i.e. these transcripts have unknown coding potential
Part A. 21-PHAS in Lilium
Name	Abundance in vegetative sample (n=1)	Abundances in reproductive samples (n=5)	Protein coding status	miRNA trigger	Annotation
21-PHAS-1	0	4620	nc	miR2118	-
21-PHAS-10	1	19787	nc	miR2275	-
21-PHAS-11	1	2805	nc	na	-
21-PHAS-13	0	8628	nc	na	-
21-PHAS-14	0	4294	nc	na	-
21-PHAS-15	0	1859	nc	miR2275	-
21-PHAS-16	27	59353	nc	na	-
21-PHAS-17	5	17706	nc	miR2275	-
21-PHAS-18	1	5021	up	na	-
21-PHAS-19	8	17936	nc	na	-
21-PHAS-2	0	3308	nc	na	-
21-PHAS-20	0	1528	nc	na	-
21-PHAS-21	0	5597	nc	na	-
21-PHAS-22	1	7533	nc	na	-
21-PHAS-23	0	3886	nc	na	-
21-PHAS-24	3	8659	nc	na	-
21-PHAS-25	0	2649	nc	na	-
21-PHAS-26	0	2479	co	na	-
21-PHAS-27	0	5195	nc	miR2118	-
21-PHAS-28	0	3864	nc	na	-
21-PHAS-29	5	30071	nc	miR2118	-
21-PHAS-31	8	35602	nc	na	-
21-PHAS-32	10	25001	nc	na	-
21-PHAS-33	5	21202	nc	na	-
21-PHAS-34	3	8246	nc	na	-
21-PHAS-35	6	8058	nc	na	-
21-PHAS-36	4	19613	nc	na	-
21-PHAS-37	2	3579	nc	na	-
21-PHAS-39	0	5307	nc	miR2118	-
21-PHAS-40	1	10977	nc	na	-
21-PHAS-41	0	5955	nc	miR2118	-
21-PHAS-42	1	6753	nc	na	-
21-PHAS-43	5	34245	nc	na	-
21-PHAS-44	13	34657	nc	na	-
21-PHAS-45	18	44173	nc	na	-
21-PHAS-47	2	12622	nc	na	-
21-PHAS-48	1	5714	nc	na	-
21-PHAS-49	7	12734	nc	na	-
21-PHAS-5	0	2733	nc	na	-
21-PHAS-50	0	1422	nc	na	-
21-PHAS-52	1	8204	nc	miR2118	-
21-PHAS-53	4	19863	nc	miR2118	-
21-PHAS-54	1	7545	nc	na	-
21-PHAS-55	1	6612	nc	na	-
21-PHAS-56	3	16721	nc	na	-
21-PHAS-57	0	2434	nc	miR2118	-
21-PHAS-58	4	11896	nc	na	-
21-PHAS-59	4	6651	nc	na	-
21-PHAS-6	1	8844	nc	na	-
21-PHAS-60	34	98311	nc	na	-
21-PHAS-61	7	18836	nc	na	-
21-PHAS-62	0	3926	nc	na	-
21-PHAS-63	0	4547	nc	na	-
21-PHAS-64	0	4954	nc	na	-
21-PHAS-65	4	13714	co	na	Guanine nucleotide-binding protein subunit beta-like protein
21-PHAS-66	1	8499	nc	miR2118	-
21-PHAS-67	2	6162	nc	miR2118	-
21-PHAS-68	16	42878	nc	miR2118	-
21-PHAS-69	1	14426	nc	na	-
21-PHAS-7	10	22804	nc	na	-
21-PHAS-70	4	10737	nc	na	-
21-PHAS-71	1	7930	nc	na	-
21-PHAS-72	5	18054	nc	na	-
21-PHAS-73	2	8353	nc	miR2275	-
21-PHAS-74	0	1808	nc	miR2275	-
21-PHAS-75	2	19833	nc	na	-
21-PHAS-76	3	17511	nc	miR2275	-
21-PHAS-77	10	43843	nc	na	-
21-PHAS-78	0	4274	nc	na	-
21-PHAS-79	1	7167	nc	na	-
21-PHAS-8	3	4897	nc	na	-
21-PHAS-80	7	13574	up	miR2275	-
21-PHAS-81	11	29177	nc	na	-
21-PHAS-82	3	8772	nc	na	-
21-PHAS-83	3	19060	nc	na	-
21-PHAS-84	10	44059	nc	miR2118	-
21-PHAS-85	1	2941	nc	na	-
21-PHAS-86	1	8547	nc	na	-
21-PHAS-87	3	17173	nc	miR2118	-
21-PHAS-88	8	35282	nc	na	-
21-PHAS-89	11	29084	nc	miR2118	-
21-PHAS-9	1	6280	nc	na	-
21-PHAS-90	6	13345	nc	na	-
21-PHAS-91	1	5375	nc	na	-
21-PHAS-92	7	10418	nc	miR2118	-
Part B. 21-PHAS specifically enriched in post-meiotic stages in Lilium
Name	Abundance in vegetative leaf	Abundances in pre-meiotic anther	Abundances in post-meiotic anther	Protein coding status	miRNA trigger	Annotation
21-PHAS-3	0	9	2612	co	na	Probable UMP/CMP kinase 4
21-PHAS-4	0	0	1922	up	na	-
21-PHAS-12	0	11	1461	co	na	-
21-PHAS-30	1	5	1402	co	na	Cirhin
21-PHAS-38	0	2	1185	co	na	ribosomal protein S9-1
21-PHAS-46	0	9	4238	co	na	Ubiquitin carboxyl-terminal hydrolase 21
21-PHAS-51	0	2	6700	co	na	Guanine nucleotide-binding protein subunit beta-like protein

## Sheet: S12. DL 21- and 24-PHAS
Table S12. Summary of 24- and 21-PHAS precursors identified in daylily
In the "coding status" column,"nc" means precursors is a non-coding RNA, "co" means precursors has significant coding potential and "up" means that coding potential could not be determined with confidence, i.e. these transcripts have unknown coding potential.
Part A. 24-PHAS in Daylily
Name	Abundance in vegetative sample (n=1)	Abundances in reproductive samples (anther, n=9)	Protein coding status	miRNA trigger	Annotation
24-PHAS-101	0	25514	nc	na	na
24-PHAS-105	0	1423	nc	na	na
24-PHAS-113	0	18381	nc	na	na
24-PHAS-120	1	19126	nc	na	na
24-PHAS-123	2	13578	nc	na	na
24-PHAS-126	1	4032	up	na	na
24-PHAS-127	0	19904	nc	na	na
24-PHAS-13	3	33422	nc	na	na
24-PHAS-132	0	6551	nc	na	na
24-PHAS-133	13	70448	nc	na	na
24-PHAS-134	0	1185	nc	na	na
24-PHAS-135	0	3727	nc	na	na
24-PHAS-138	0	5426	nc	na	na
24-PHAS-14	0	13579	nc	na	na
24-PHAS-143	0	3625	nc	na	na
24-PHAS-144	0	20538	nc	miR2275	na
24-PHAS-148	6	37633	nc	na	na
24-PHAS-149	1	6967	nc	na	na
24-PHAS-15	0	1660	nc	na	na
24-PHAS-150	0	79611	nc	na	na
24-PHAS-151	0	2799	co	miR2275	Pentatricopeptide repeat-containing protein At1g55890, mitochondrial
24-PHAS-152	1	14849	nc	miR2275	na
24-PHAS-154	0	24157	nc	na	na
24-PHAS-155	3	81918	nc	na	na
24-PHAS-158	1	16877	nc	na	na
24-PHAS-16	0	1694	nc	na	na
24-PHAS-161	2	19939	nc	na	na
24-PHAS-163	0	18091	nc	na	na
24-PHAS-166	0	18379	co	na	Lysine histidine transporter 2
24-PHAS-167	2	46073	nc	na	na
24-PHAS-169	0	8878	co	na	Ras-related protein RGP1
24-PHAS-17	0	8720	nc	na	na
24-PHAS-170	0	11421	up	na	na
24-PHAS-172	0	18463	co	na	Lysine histidine transporter 2
24-PHAS-175	0	16040	nc	na	na
24-PHAS-176	0	22391	nc	na	na
24-PHAS-180	0	1504	nc	na	na
24-PHAS-181	0	2668	nc	na	na
24-PHAS-182	0	14362	nc	na	na
24-PHAS-187	0	41381	nc	na	na
24-PHAS-188	0	4016	nc	na	na
24-PHAS-189	0	1039	nc	na	na
24-PHAS-19	0	4994	nc	na	na
24-PHAS-191	0	13100	nc	na	na
24-PHAS-193	0	11594	nc	na	na
24-PHAS-195	0	2249	nc	na	na
24-PHAS-197	0	1092	nc	na	na
24-PHAS-198	1	29676	nc	na	na
24-PHAS-199	0	1161	nc	na	na
24-PHAS-20	0	18721	nc	na	na
24-PHAS-203	0	8858	nc	na	na
24-PHAS-205	2	20778	nc	miR2275	na
24-PHAS-206	1	95979	nc	miR2275	na
24-PHAS-208	0	25927	nc	na	na
24-PHAS-210	0	2842	nc	na	na
24-PHAS-213	0	25664	nc	na	na
24-PHAS-216	0	5846	nc	na	na
24-PHAS-218	0	8174	nc	na	na
24-PHAS-22	0	3677	nc	na	na
24-PHAS-220	3	13143	nc	na	na
24-PHAS-226	0	1027	nc	miR2275	na
24-PHAS-228	0	5210	nc	na	na
24-PHAS-229	0	10538	nc	na	na
24-PHAS-23	0	21172	nc	na	na
24-PHAS-230	0	9041	nc	na	na
24-PHAS-231	8	143390	nc	na	na
24-PHAS-232	0	3571	nc	miR2275	na
24-PHAS-235	0	6820	nc	na	na
24-PHAS-236	0	3173	nc	na	na
24-PHAS-237	0	5888	nc	na	na
24-PHAS-239	0	2130	nc	na	na
24-PHAS-24	0	1358	co	na	Probable protein S-acyltransferase 7
24-PHAS-241	0	7996	co	na	na
24-PHAS-243	0	2232	nc	na	na
24-PHAS-248	0	2176	co	na	Chalcone--flavonone isomerase
24-PHAS-249	0	2821	nc	na	na
24-PHAS-25	0	22842	nc	na	na
24-PHAS-251	1	6120	nc	na	na
24-PHAS-255	0	64484	nc	na	na
24-PHAS-258	2	73588	nc	miR2275	na
24-PHAS-259	0	8106	nc	na	na
24-PHAS-26	0	9823	nc	na	na
24-PHAS-260	0	13506	nc	na	na
24-PHAS-261	0	12208	nc	na	na
24-PHAS-268	0	1641	nc	na	na
24-PHAS-272	0	76004	nc	na	na
24-PHAS-274	2	42071	nc	na	na
24-PHAS-275	1	31587	nc	miR2275	na
24-PHAS-276	0	16475	nc	miR2275	na
24-PHAS-278	0	1781	nc	na	na
24-PHAS-280	0	11576	up	na	na
24-PHAS-282	0	1980	nc	miR2275	na
24-PHAS-284	0	22344	nc	na	na
24-PHAS-285	1	16647	nc	na	na
24-PHAS-287	0	14610	nc	na	na
24-PHAS-29	3	90385	nc	na	na
24-PHAS-293	15	241653	nc	na	na
24-PHAS-295	0	1367	nc	na	na
24-PHAS-296	0	5680	nc	na	na
24-PHAS-297	0	1841	nc	na	na
24-PHAS-300	1	3537	co	na	Patatin-like phospholipase domain-containing protein 2
24-PHAS-301	0	6437	nc	na	na
24-PHAS-302	0	24849	nc	na	na
24-PHAS-306	0	5996	nc	na	na
24-PHAS-309	0	1205	nc	miR2275	na
24-PHAS-31	0	4055	nc	na	na
24-PHAS-311	6	28202	nc	miR2275	na
24-PHAS-312	0	43801	nc	na	na
24-PHAS-313	0	1519	up	na	na
24-PHAS-314	0	2594	up	na	na
24-PHAS-316	0	2390	nc	na	na
24-PHAS-317	1	10632	nc	na	na
24-PHAS-318	0	7994	nc	na	na
24-PHAS-320	0	6411	nc	na	na
24-PHAS-321	1	1416	up	na	na
24-PHAS-322	1	66029	nc	na	na
24-PHAS-323	2	5069	up	na	na
24-PHAS-329	2	18403	nc	na	na
24-PHAS-33	0	49836	nc	na	na
24-PHAS-330	0	31994	nc	na	na
24-PHAS-331	0	10730	co	na	na
24-PHAS-332	0	2554	nc	na	na
24-PHAS-333	0	16285	nc	na	na
24-PHAS-334	1	21209	up	na	na
24-PHAS-335	0	1642	nc	na	na
24-PHAS-336	0	3897	nc	na	na
24-PHAS-337	0	4058	nc	na	na
24-PHAS-340	0	2200	co	na	Patatin-like phospholipase domain-containing protein 2
24-PHAS-342	0	3318	nc	na	na
24-PHAS-343	0	1415	nc	na	na
24-PHAS-345	0	18191	nc	miR2275	na
24-PHAS-349	1	22759	up	na	na
24-PHAS-350	0	8960	nc	miR2275	na
24-PHAS-351	0	4587	nc	miR2275	na
24-PHAS-352	0	3898	nc	na	na
24-PHAS-355	0	5867	up	na	na
24-PHAS-357	0	1203	nc	na	na
24-PHAS-358	0	14739	nc	na	na
24-PHAS-359	0	21262	nc	miR2275	na
24-PHAS-362	0	2661	nc	na	na
24-PHAS-363	0	1194	nc	na	na
24-PHAS-364	0	1158	nc	miR2275	na
24-PHAS-365	1	23069	nc	na	na
24-PHAS-366	0	17076	nc	na	na
24-PHAS-368	0	16997	nc	na	na
24-PHAS-369	3	33422	nc	na	na
24-PHAS-37	0	4801	nc	na	na
24-PHAS-372	0	2707	up	na	na
24-PHAS-373	0	17456	nc	na	na
24-PHAS-374	0	7716	nc	miR2275	na
24-PHAS-38	0	9441	nc	na	na
24-PHAS-380	0	5312	nc	na	na
24-PHAS-381	0	23010	co	na	na
24-PHAS-384	0	3125	nc	na	na
24-PHAS-385	1	6073	up	na	na
24-PHAS-386	0	3786	nc	na	na
24-PHAS-39	2	25545	nc	miR2275	na
24-PHAS-391	1	23154	nc	na	na
24-PHAS-393	1	1416	up	na	na
24-PHAS-394	6	179841	co	na	Elongation factor 1-beta
24-PHAS-395	0	2135	up	na	na
24-PHAS-398	0	50656	nc	miR2275	na
24-PHAS-399	0	1538	co	na	Condensin complex subunit 1
24-PHAS-4	2	37822	nc	na	na
24-PHAS-400	0	8097	nc	na	na
24-PHAS-405	2	42628	nc	na	na
24-PHAS-407	1	21588	nc	na	na
24-PHAS-408	2	12233	nc	na	na
24-PHAS-410	0	6365	nc	na	na
24-PHAS-411	0	8960	nc	na	na
24-PHAS-412	0	1215	nc	na	na
24-PHAS-414	1	25410	nc	na	na
24-PHAS-415	1	17989	nc	na	na
24-PHAS-417	1	1060	nc	na	na
24-PHAS-419	0	16512	nc	na	na
24-PHAS-42	0	1704	nc	na	na
24-PHAS-421	0	6591	nc	na	na
24-PHAS-424	0	16008	nc	na	na
24-PHAS-427	0	2448	nc	miR2275	na
24-PHAS-428	0	86337	nc	na	na
24-PHAS-43	0	13575	nc	na	na
24-PHAS-430	0	20805	nc	na	na
24-PHAS-432	0	22712	nc	na	na
24-PHAS-437	0	1209	nc	na	na
24-PHAS-438	0	106147	nc	na	na
24-PHAS-439	0	8425	nc	na	na
24-PHAS-441	2	12748	nc	na	na
24-PHAS-442	1	16313	nc	miR2275	na
24-PHAS-444	1	63564	nc	na	na
24-PHAS-445	0	1293	nc	na	na
24-PHAS-446	4	119457	nc	na	na
24-PHAS-448	0	5466	co	na	Iron-sulfur cluster assembly protein 1
24-PHAS-45	0	5867	nc	na	na
24-PHAS-451	0	15572	nc	na	na
24-PHAS-452	0	21178	nc	na	na
24-PHAS-458	0	23242	co	na	na
24-PHAS-459	0	3287	nc	na	na
24-PHAS-46	2	30987	nc	na	na
24-PHAS-460	0	1489	nc	na	na
24-PHAS-461	0	4420	nc	na	na
24-PHAS-463	2	18203	nc	na	na
24-PHAS-464	0	3031	nc	na	na
24-PHAS-467	10	27986	co	na	Retrovirus-related Pol polyprotein from transposon TNT 1-94
24-PHAS-468	0	6441	nc	na	na
24-PHAS-470	0	8474	nc	na	na
24-PHAS-471	1	12491	nc	na	na
24-PHAS-473	0	5105	nc	na	na
24-PHAS-474	0	12042	nc	na	na
24-PHAS-478	0	2883	nc	na	na
24-PHAS-48	0	3613	nc	na	na
24-PHAS-484	2	41174	nc	miR2275	na
24-PHAS-490	0	1858	nc	na	na
24-PHAS-491	0	15291	nc	na	na
24-PHAS-493	3	7831	nc	na	na
24-PHAS-496	1	5556	nc	na	na
24-PHAS-500	3	35308	nc	na	na
24-PHAS-502	0	2293	nc	na	na
24-PHAS-504	0	15291	nc	na	na
24-PHAS-505	0	1558	nc	na	na
24-PHAS-507	0	22742	nc	miR2275	na
24-PHAS-509	0	8457	nc	na	na
24-PHAS-513	0	2625	nc	na	na
24-PHAS-516	0	9506	nc	na	na
24-PHAS-519	0	11743	nc	na	na
24-PHAS-52	0	18497	co	na	LOB domain-containing protein 24
24-PHAS-522	0	16161	nc	na	na
24-PHAS-54	0	4360	nc	na	na
24-PHAS-55	0	31622	nc	na	na
24-PHAS-56	0	23242	nc	na	na
24-PHAS-58	0	1189	nc	na	na
24-PHAS-60	0	6929	nc	na	na
24-PHAS-63	2	4842	nc	na	na
24-PHAS-64	1	25090	nc	na	na
24-PHAS-66	0	25199	nc	na	na
24-PHAS-67	1	2439	nc	na	na
24-PHAS-68	0	4337	nc	na	na
24-PHAS-7	0	2240	nc	na	na
24-PHAS-73	0	4305	nc	miR2275	na
24-PHAS-77	0	21450	nc	miR2275	na
24-PHAS-8	0	3219	nc	na	na
24-PHAS-84	1	35993	nc	na	na
24-PHAS-89	0	3811	nc	na	na
24-PHAS-93	0	4281	nc	na	na
24-PHAS-527	504	31042	nc	na	na
Part B. 24-PHAS in Daylily Pistils
Name	Abundance in vegetative sample (n=1)	Abundances in reproductive samples (pistil, n=5)	Protein coding status	miRNA trigger	Annotation
24-PHAS-18	3	7799	nc	na	-
24-PHAS-25	829	72549	nc	na	-
24-PHAS-34	3	4888	nc	na	-
Part C. 21-PHAS in Daylily
Name	Abundance in vegetative sample (n=1)	Abundances in reproductive samples (anther, n=9)	Protein coding status	miRNA trigger	Annotation
21-PHAS-5	2108	6589	co	na	Transport inhibitor response 1-like protein
21-PHAS-12	5040	10747	nc	na	-

## Sheet: S13. LA 24-PHAS
Table S13. Summary of 24-PHAS precursors identified in lily
In coding status column,"nc" means non-coding RNA, "co" means precursors has significant coding potential and "up" means that coding potential could not be determined with confidence i.e. these transcripts have unknown coding potential
In "Type" column,"foldback" represents precusrors with strong tendency to forn double-stranded foldback strycture and "foldback L-to-B" represents cadidate set that most likely prcessed from loop-to-base as a fold-back
Name	Abundance in vegetative sample (n=1)	Abundances in reproductive samples (n=5)	Protein coding status	miRNA trigger	Annotation	Type
24-PHAS-100	0	2090	nc	miR2275	-	-
24-PHAS-1001	76	187494	nc	na	-	-
24-PHAS-1006	4	7234	nc	na	-	-
24-PHAS-1007	44	80358	nc	miR2275	-	foldback
24-PHAS-1008	0	4574	nc	na	-	-
24-PHAS-1011	5	19539	nc	miR2275	-	-
24-PHAS-1017	0	9224	nc	na	-	-
24-PHAS-1018	1	27502	nc	na	-	-
24-PHAS-1021	1	2392	nc	na	-	-
24-PHAS-1023	1	3977	nc	na	-	-
24-PHAS-1024	0	1509	nc	miR2275	-	-
24-PHAS-1026	1	4438	nc	na	-	-
24-PHAS-1027	7	37223	nc	na	-	-
24-PHAS-103	18	66665	nc	na	-	foldback
24-PHAS-1030	0	4145	nc	na	-	-
24-PHAS-1036	0	1540	nc	na	-	-
24-PHAS-1038	12	38793	nc	na	-	-
24-PHAS-1039	4	3671	nc	na	-	-
24-PHAS-1043	0	3462	nc	na	-	-
24-PHAS-1044	2	8174	nc	na	-	-
24-PHAS-1045	10	21361	nc	miR2275	-	-
24-PHAS-1047	0	1805	nc	na	-	-
24-PHAS-1048	0	3459	nc	miR2275	-	-
24-PHAS-1054	5	32239	nc	na	-	-
24-PHAS-1055	0	11717	nc	na	-	-
24-PHAS-1057	0	3471	nc	na	-	-
24-PHAS-1058	10	50674	nc	miR2275	-	-
24-PHAS-1063	1	9892	nc	na	-	foldback
24-PHAS-1064	2	18812	nc	miR2275	-	-
24-PHAS-1066	1	8421	nc	miR2275	-	-
24-PHAS-1070	34	116941	nc	miR2275	-	-
24-PHAS-1073	7	48166	nc	miR2275	-	-
24-PHAS-1075	10	47036	nc	na	-	-
24-PHAS-1077	5	13010	nc	miR2275	-	-
24-PHAS-1078	0	1015	nc	na	-	-
24-PHAS-1079	1	3257	nc	na	-	-
24-PHAS-1081	1	980	co	na	Nucleolar MIF4G domain-containing protein 1	-
24-PHAS-1085	0	1871	nc	na	-	-
24-PHAS-1086	0	9504	nc	na	-	-
24-PHAS-1087	5	33979	nc	na	-	-
24-PHAS-1088	8	4781	nc	na	-	-
24-PHAS-1089	1	2128	nc	na	-	foldback
24-PHAS-109	0	1279	nc	na	-	-
24-PHAS-1093	3	3563	nc	na	-	-
24-PHAS-1095	0	4688	nc	na	-	-
24-PHAS-1096	0	4357	nc	na	-	-
24-PHAS-1097	0	1159	nc	na	-	-
24-PHAS-1099	0	1350	nc	miR2275	-	-
24-PHAS-1101	1	10485	nc	na	-	-
24-PHAS-1103	1	1135	nc	na	-	-
24-PHAS-1104	2	4326	nc	na	-	-
24-PHAS-1107	37	122419	nc	na	-	-
24-PHAS-1108	2	7923	nc	miR2275	-	-
24-PHAS-1110	4	14509	nc	na	-	foldback
24-PHAS-1112	0	2755	nc	miR2275	-	-
24-PHAS-1114	17	42017	nc	miR2275	-	-
24-PHAS-1115	1	6115	nc	na	-	-
24-PHAS-1116	0	4392	nc	miR2275	-	-
24-PHAS-1117	6	17660	nc	na	-	-
24-PHAS-1119	1	7938	nc	miR2275	-	-
24-PHAS-112	1	8398	nc	na	-	foldback
24-PHAS-112	41	100901	nc	na	-	foldback
24-PHAS-1121	6	4932	nc	na	-	-
24-PHAS-1125	4	4718	nc	na	-	-
24-PHAS-1126	26	116321	nc	na	-	-
24-PHAS-1128	0	1167	nc	na	-	-
24-PHAS-113	0	2288	nc	na	-	-
24-PHAS-1130	6	14438	nc	na	-	-
24-PHAS-1131	7	16619	nc	na	-	-
24-PHAS-1132	3	6253	nc	na	-	-
24-PHAS-1138	11	32495	nc	na	-	-
24-PHAS-1139	8	24801	up	na	-	-
24-PHAS-1141	0	5618	nc	miR2275	-	-
24-PHAS-1146	0	1411	nc	miR2275	-	-
24-PHAS-1148	0	1595	nc	miR2275	-	-
24-PHAS-1149	7	41745	nc	na	-	-
24-PHAS-115	10	25034	nc	na	-	-
24-PHAS-1151	0	1037	nc	na	-	-
24-PHAS-1153	6	8482	nc	na	-	-
24-PHAS-1157	5	6669	nc	na	-	-
24-PHAS-1158	4	23887	nc	na	-	-
24-PHAS-116	4	18397	nc	na	-	-
24-PHAS-1160	3	27567	nc	na	-	-
24-PHAS-1161	1	8119	nc	na	-	-
24-PHAS-1164	4	18195	nc	na	-	-
24-PHAS-1168	10	29934	nc	na	-	-
24-PHAS-1169	11	49491	nc	na	-	-
24-PHAS-117	6	8711	nc	na	-	-
24-PHAS-1172	6	27392	nc	na	-	-
24-PHAS-1173	3	4335	nc	miR2275	-	-
24-PHAS-1175	1	2293	nc	na	-	-
24-PHAS-1176	9	44505	nc	miR2275	-	-
24-PHAS-1177	132	423896	nc	na	-	-
24-PHAS-118	42	176019	nc	miR2275	-	-
24-PHAS-1183	0	8428	nc	na	-	-
24-PHAS-1184	25	114173	nc	na	-	-
24-PHAS-1187	7	22410	nc	na	-	-
24-PHAS-1188	2	3160	nc	miR2275	-	-
24-PHAS-1189	3	16180	nc	na	-	-
24-PHAS-119	1	5693	nc	miR2275	-	foldback
24-PHAS-119	1	890	nc	na	-	foldback
24-PHAS-1190	3	22303	nc	miR2275	-	-
24-PHAS-1193	7	13256	nc	na	-	-
24-PHAS-1194	1	3698	nc	miR2275	-	-
24-PHAS-1197	57	111569	nc	miR2275	-	-
24-PHAS-1199	0	2285	nc	na	-	-
24-PHAS-12	14	44820	nc	miR2275	-	foldback
24-PHAS-1200	0	4165	nc	miR2275	-	-
24-PHAS-1201	19	66248	nc	miR2275	-	-
24-PHAS-1204	1	1109	nc	miR2275	-	-
24-PHAS-1206	0	1290	nc	miR2275	-	-
24-PHAS-1207	3	5663	nc	na	-	-
24-PHAS-1209	0	9102	nc	na	-	-
24-PHAS-1214	8	10866	nc	na	-	-
24-PHAS-1216	2	8766	nc	na	-	-
24-PHAS-1218	51	140834	nc	na	-	-
24-PHAS-1219	0	1076	nc	miR2275	-	-
24-PHAS-122	48	203381	nc	na	-	-
24-PHAS-1221	5	49771	nc	miR2275	-	-
24-PHAS-1222	5	15848	nc	na	-	-
24-PHAS-1226	27	84356	nc	na	-	foldback
24-PHAS-1227	4	6501	nc	miR2275	-	-
24-PHAS-1229	2	19500	nc	na	-	-
24-PHAS-1235	1	2764	nc	na	-	-
24-PHAS-1236	40	144038	nc	na	-	-
24-PHAS-1237	9	25990	nc	na	-	-
24-PHAS-1238	9	37773	nc	na	-	-
24-PHAS-1240	0	5894	nc	na	-	-
24-PHAS-1244	27	87902	nc	miR2275	-	-
24-PHAS-1248	18	63383	up	miR2275	-	-
24-PHAS-1249	0	1090	nc	na	-	-
24-PHAS-125	1	7097	nc	miR2275	-	-
24-PHAS-1252	0	1649	nc	na	-	-
24-PHAS-1255	4	8192	nc	na	-	-
24-PHAS-1256	0	14969	nc	na	-	-
24-PHAS-1257	9	54529	nc	na	-	-
24-PHAS-1258	2	2868	nc	na	-	-
24-PHAS-1259	1	16143	nc	na	-	-
24-PHAS-126	1	2678	nc	na	-	-
24-PHAS-1265	1	5624	nc	miR2275	-	-
24-PHAS-1269	31	84414	nc	miR2275	-	-
24-PHAS-127	1	5457	nc	na	-	-
24-PHAS-1270	2	16903	nc	na	-	-
24-PHAS-1272	1	3858	nc	miR2275	-	-
24-PHAS-1275	67	321040	nc	miR2275	-	-
24-PHAS-128	10	43514	nc	miR2275	-	-
24-PHAS-1280	2	10448	nc	na	-	-
24-PHAS-1283	4	19193	nc	na	-	-
24-PHAS-1288	11	57540	nc	na	-	-
24-PHAS-1289	1	13315	nc	na	-	-
24-PHAS-1290	2	23542	nc	miR2275	-	-
24-PHAS-1294	0	2218	nc	na	-	-
24-PHAS-1298	1	16914	nc	na	-	-
24-PHAS-1299	1	9764	nc	miR2275	-	-
24-PHAS-1301	31	98144	nc	na	-	-
24-PHAS-1305	1	9124	nc	na	-	-
24-PHAS-1308	0	2702	nc	na	-	-
24-PHAS-1309	4	7060	nc	na	-	-
24-PHAS-1311	4	26659	nc	na	-	-
24-PHAS-1313	1	5554	nc	miR2275	-	-
24-PHAS-1315	1	3810	nc	na	-	-
24-PHAS-1316	1	2640	nc	miR2275	-	-
24-PHAS-1317	4	15461	nc	na	-	-
24-PHAS-132	48	111636	nc	miR2275	-	foldback
24-PHAS-1321	11	24336	nc	na	-	-
24-PHAS-1323	0	2599	nc	miR2275	-	-
24-PHAS-1324	2	6777	nc	na	-	-
24-PHAS-1329	0	1466	nc	na	-	-
24-PHAS-1330	5	17844	nc	miR2275	-	-
24-PHAS-1334	50	157876	nc	miR2275	-	-
24-PHAS-1336	1	7406	nc	na	-	-
24-PHAS-1337	7	18756	nc	miR2275	-	-
24-PHAS-1338	0	1599	nc	na	-	-
24-PHAS-1339	7	24708	nc	miR2275	-	-
24-PHAS-134	9	35081	nc	na	-	foldback
24-PHAS-1342	0	2161	nc	miR2275	-	-
24-PHAS-1343	0	5405	nc	na	-	-
24-PHAS-1344	5	42525	nc	na	-	-
24-PHAS-1345	0	12010	nc	na	-	-
24-PHAS-1346	11	44244	nc	na	-	-
24-PHAS-1347	0	2224	nc	na	-	-
24-PHAS-1349	4	8942	nc	na	-	-
24-PHAS-1350	2	3981	nc	na	-	-
24-PHAS-1351	25	60492	nc	na	-	-
24-PHAS-1352	1	828	nc	na	-	-
24-PHAS-1353	46	101353	nc	na	-	foldback
24-PHAS-1354	2	11178	nc	na	-	-
24-PHAS-1359	1	6029	nc	miR2275	-	-
24-PHAS-136	10	18038	nc	miR2275	-	-
24-PHAS-1360	4	7044	nc	na	-	-
24-PHAS-1364	1	7095	nc	na	-	-
24-PHAS-1366	1	2517	nc	na	-	-
24-PHAS-137	1	3421	nc	na	-	foldback
24-PHAS-137	27	176413	nc	na	-	foldback
24-PHAS-1372	0	1046	nc	miR2275	-	-
24-PHAS-1373	3	13131	nc	miR2275	-	-
24-PHAS-1375	13	43733	nc	miR2275	-	-
24-PHAS-1376	1	9071	nc	na	-	-
24-PHAS-1377	2	20994	nc	miR2275	-	-
24-PHAS-1379	7	47632	nc	na	-	-
24-PHAS-1380	23	67806	nc	miR2275	-	-
24-PHAS-1381	10	15200	nc	miR2275	-	-
24-PHAS-1382	1	3240	nc	na	-	-
24-PHAS-1384	12	39292	nc	miR2275	-	-
24-PHAS-1385	0	835	nc	na	-	-
24-PHAS-1387	6	10120	nc	na	-	-
24-PHAS-139	0	10921	nc	na	-	-
24-PHAS-1391	4	13678	nc	miR2275	-	-
24-PHAS-1392	15	101945	nc	miR2275	-	-
24-PHAS-1394	1	16314	nc	na	-	-
24-PHAS-1397	2	11817	nc	na	-	-
24-PHAS-140	1	5412	nc	miR2275	-	-
24-PHAS-1403	1	4886	nc	na	-	-
24-PHAS-1404	0	1849	nc	miR2275	-	-
24-PHAS-1406	3	10916	nc	miR2275	-	-
24-PHAS-1411	7	42184	nc	na	-	-
24-PHAS-1415	8	38033	nc	miR2275	-	-
24-PHAS-1416	1	3966	nc	miR2275	-	-
24-PHAS-1418	7	20241	nc	na	-	-
24-PHAS-1421	1	4715	nc	na	-	-
24-PHAS-1424	13	20527	nc	miR2275	-	-
24-PHAS-1430	0	1123	nc	na	-	-
24-PHAS-1434	22	81284	nc	na	-	-
24-PHAS-1436	1	2099	nc	miR2275	-	-
24-PHAS-1439	0	5006	nc	miR2275	-	-
24-PHAS-1440	0	971	nc	na	-	-
24-PHAS-1442	10	70223	nc	miR2275	-	-
24-PHAS-1446	1	5243	nc	na	-	-
24-PHAS-1447	3	6738	nc	na	-	-
24-PHAS-1448	0	3021	nc	na	-	-
24-PHAS-145	0	1299	nc	na	-	-
24-PHAS-1450	6	32426	nc	na	-	-
24-PHAS-1452	3	9851	nc	na	-	-
24-PHAS-1455	0	1236	nc	na	-	-
24-PHAS-1456	8	30072	nc	miR2275	-	-
24-PHAS-1459	0	1358	nc	na	-	-
24-PHAS-1461	18	31869	nc	na	-	-
24-PHAS-1462	2	3193	co	na	Probable signal peptidase complex subunit 2	-
24-PHAS-1463	19	52407	nc	na	-	-
24-PHAS-1464	32	118606	nc	na	-	-
24-PHAS-1467	9	17749	nc	na	-	-
24-PHAS-147	3	4989	nc	na	-	-
24-PHAS-1470	61	161838	nc	na	-	-
24-PHAS-1472	30	74703	nc	miR2275	-	-
24-PHAS-1476	5	17741	nc	na	-	-
24-PHAS-1477	3	8095	nc	miR2275	-	-
24-PHAS-148	18	32476	nc	miR2275	-	-
24-PHAS-1480	5	7493	nc	miR2275	-	-
24-PHAS-1483	1	1654	nc	miR2275	-	-
24-PHAS-1484	0	3670	nc	na	-	-
24-PHAS-1485	0	9674	nc	na	-	-
24-PHAS-1492	2	9617	nc	na	-	-
24-PHAS-1493	1	10597	nc	na	-	-
24-PHAS-15	0	8379	nc	na	-	foldback
24-PHAS-1502	2	8967	nc	miR2275	-	-
24-PHAS-1504	106	371581	nc	na	-	-
24-PHAS-1507	4	5787	nc	na	-	-
24-PHAS-1510	5	25462	nc	na	-	-
24-PHAS-1511	2	5842	nc	na	-	-
24-PHAS-1515	5	35042	nc	miR2275	-	-
24-PHAS-1516	1	6642	nc	na	-	-
24-PHAS-1517	42	122463	nc	na	-	-
24-PHAS-1518	1	3975	nc	miR2275	-	-
24-PHAS-152	2	17960	nc	na	-	-
24-PHAS-1523	2	17112	nc	na	-	-
24-PHAS-1525	2	18345	nc	na	-	-
24-PHAS-1527	3	5923	nc	na	-	-
24-PHAS-1528	31	98144	nc	na	-	-
24-PHAS-1529	0	4066	nc	na	-	-
24-PHAS-1533	9	28469	nc	na	-	-
24-PHAS-1535	10	31070	nc	na	-	-
24-PHAS-154	0	4806	nc	na	-	-
24-PHAS-1541	0	1796	nc	miR2275	-	-
24-PHAS-1542	1	5826	nc	miR2275	-	-
24-PHAS-1544	23	52599	nc	na	-	-
24-PHAS-1547	1	4278	nc	na	-	-
24-PHAS-1549	0	5009	nc	na	-	-
24-PHAS-1550	1	2694	nc	na	-	-
24-PHAS-1556	3	11324	nc	miR2275	-	-
24-PHAS-1559	3	11629	nc	miR2275	-	-
24-PHAS-1560	0	3952	nc	na	-	-
24-PHAS-1563	13	20647	nc	na	-	-
24-PHAS-1565	1	9248	nc	na	-	-
24-PHAS-1568	0	2648	nc	na	-	-
24-PHAS-157	3	20938	nc	na	-	-
24-PHAS-1570	52	131724	nc	na	-	-
24-PHAS-1571	30	66874	nc	na	-	-
24-PHAS-1574	5	12094	nc	na	-	-
24-PHAS-1575	5	5508	nc	miR2275	-	-
24-PHAS-1577	2	16780	nc	na	-	-
24-PHAS-1578	0	3521	nc	miR2275	-	-
24-PHAS-158	18	27147	nc	na	-	-
24-PHAS-1580	0	1072	nc	na	-	-
24-PHAS-1587	0	3664	nc	na	-	-
24-PHAS-1588	0	11526	nc	miR2275	-	-
24-PHAS-1589	0	1963	nc	na	-	-
24-PHAS-1593	1	3365	nc	na	-	-
24-PHAS-1596	1	3575	nc	na	-	-
24-PHAS-1598	5	14762	nc	miR2275	-	-
24-PHAS-1600	4	6473	nc	miR2275	-	-
24-PHAS-1601	4	6146	nc	na	-	-
24-PHAS-1602	3	4496	nc	na	-	-
24-PHAS-1605	31	74669	nc	na	-	-
24-PHAS-1606	0	1458	nc	na	-	-
24-PHAS-1607	0	819	nc	na	-	-
24-PHAS-1608	1	718	nc	miR2275	-	-
24-PHAS-1610	2	5247	nc	na	-	-
24-PHAS-1613	3	23885	nc	na	-	-
24-PHAS-1614	0	3900	nc	miR2275	-	-
24-PHAS-1618	2	27073	nc	na	-	-
24-PHAS-1619	3	23295	nc	na	-	-
24-PHAS-1621	20	50879	nc	miR2275	-	-
24-PHAS-1625	11	31469	nc	na	-	-
24-PHAS-1626	14	75310	nc	na	-	-
24-PHAS-1630	0	11582	nc	miR2275	-	-
24-PHAS-1631	22	70147	nc	na	-	-
24-PHAS-1632	1	4951	nc	miR2275	-	-
24-PHAS-1633	0	1243	nc	miR2275	-	-
24-PHAS-1636	23	76041	nc	na	-	-
24-PHAS-1638	38	152483	nc	miR2275	-	-
24-PHAS-1644	11	40831	nc	na	-	-
24-PHAS-1646	1	4820	nc	na	-	-
24-PHAS-165	8	18106	nc	na	-	-
24-PHAS-1650	2	17519	nc	na	-	-
24-PHAS-1652	4	9719	nc	miR2275	-	-
24-PHAS-1657	2	19470	nc	miR2275	-	-
24-PHAS-1662	0	2523	nc	na	-	-
24-PHAS-1663	27	82891	nc	miR2275	-	-
24-PHAS-1666	52	201493	nc	miR2275	-	-
24-PHAS-1667	7	21364	nc	miR2275	-	-
24-PHAS-1669	38	165905	nc	miR2275	-	-
24-PHAS-167	0	903	nc	miR2275	-	-
24-PHAS-1672	0	2506	nc	na	-	-
24-PHAS-1673	38	91194	nc	na	-	-
24-PHAS-1679	15	70074	nc	na	-	-
24-PHAS-168	0	5386	nc	na	-	-
24-PHAS-1681	36	135675	nc	miR2275	-	foldback
24-PHAS-1682	1	2754	nc	miR2275	-	-
24-PHAS-1684	4	29359	nc	na	-	-
24-PHAS-1685	6	25677	nc	na	-	-
24-PHAS-1687	12	45214	nc	miR2275	-	-
24-PHAS-1688	4	13030	nc	na	-	-
24-PHAS-1689	0	1399	nc	na	-	-
24-PHAS-169	2	11929	nc	na	-	-
24-PHAS-1691	5	34925	nc	miR2275	-	-
24-PHAS-1692	1	10373	nc	na	-	-
24-PHAS-1694	9	31617	nc	miR2275	-	-
24-PHAS-1696	26	45761	nc	na	-	-
24-PHAS-1697	4	13308	nc	miR2275	-	-
24-PHAS-1699	1	3117	nc	miR2275	-	-
24-PHAS-17	0	2818	nc	na	-	-
24-PHAS-1701	0	4239	nc	miR2275	-	-
24-PHAS-1707	0	771	co	na	-	-
24-PHAS-1708	0	1328	nc	na	-	-
24-PHAS-1709	0	2159	up	na	-	-
24-PHAS-1718	2	8603	nc	na	-	-
24-PHAS-172	9	41450	nc	miR2275	-	foldback
24-PHAS-1721	53	188488	nc	na	-	-
24-PHAS-1722	1	21271	nc	na	-	-
24-PHAS-1723	18	45142	nc	miR2275	-	-
24-PHAS-1726	0	1998	nc	na	-	-
24-PHAS-1729	2	11224	nc	na	-	-
24-PHAS-173	3	12433	nc	na	-	foldback
24-PHAS-1736	0	4470	nc	na	-	-
24-PHAS-174	0	3915	nc	na	-	-
24-PHAS-1740	0	2043	nc	na	-	-
24-PHAS-1746	0	3574	nc	miR2275	-	-
24-PHAS-1747	0	1546	nc	na	-	-
24-PHAS-1748	18	36416	nc	na	-	-
24-PHAS-1749	19	29953	nc	na	-	-
24-PHAS-175	4	6559	nc	miR2275	-	-
24-PHAS-1751	12	22345	nc	miR2275	-	-
24-PHAS-1752	8	53072	nc	na	-	-
24-PHAS-1753	2	15202	nc	miR2275	-	-
24-PHAS-1754	1	5400	nc	miR2275	-	-
24-PHAS-1755	24	80778	nc	na	-	-
24-PHAS-1757	0	1157	nc	na	-	-
24-PHAS-1759	3	33696	nc	miR2275	-	-
24-PHAS-1760	1	5786	nc	na	-	-
24-PHAS-1762	0	2874	nc	miR2275	-	-
24-PHAS-1764	1	3081	nc	na	-	-
24-PHAS-1768	1	905	nc	miR2275	-	-
24-PHAS-1770	22	97806	nc	miR2275	-	-
24-PHAS-1771	12	69619	nc	na	-	-
24-PHAS-1774	5	15100	nc	na	-	-
24-PHAS-1775	8	57358	nc	na	-	-
24-PHAS-1778	25	117346	nc	na	-	-
24-PHAS-1779	33	98805	nc	miR2275	-	-
24-PHAS-1781	0	1158	nc	na	-	-
24-PHAS-1783	7	21037	nc	na	-	-
24-PHAS-1785	13	21171	nc	miR2275	-	-
24-PHAS-1786	0	1105	nc	na	-	-
24-PHAS-1787	2	9303	nc	na	-	-
24-PHAS-1789	0	3253	nc	na	-	-
24-PHAS-1790	5	18230	nc	na	-	-
24-PHAS-1794	0	5156	nc	na	-	-
24-PHAS-1796	1	13436	nc	na	-	-
24-PHAS-18	1	1540	nc	na	-	-
24-PHAS-1801	2	3916	nc	na	-	-
24-PHAS-1805	28	148051	nc	na	-	-
24-PHAS-1808	4	4456	nc	na	-	-
24-PHAS-1811	4	7806	nc	miR2275	-	-
24-PHAS-1812	8	22064	nc	na	-	-
24-PHAS-1813	0	1061	nc	na	-	-
24-PHAS-182	1	4830	nc	na	-	-
24-PHAS-1822	35	134874	nc	na	-	-
24-PHAS-1828	65	165836	nc	na	-	-
24-PHAS-183	0	4658	nc	na	-	-
24-PHAS-1830	3	5887	nc	na	-	-
24-PHAS-1831	0	2493	nc	miR2275	-	-
24-PHAS-1832	613	1580747	nc	na	-	foldback
24-PHAS-1834	3	17055	nc	na	-	-
24-PHAS-1837	5	20811	nc	miR2275	-	-
24-PHAS-1838	9	38350	nc	na	-	-
24-PHAS-1839	0	9822	nc	na	-	-
24-PHAS-184	0	2829	nc	na	-	-
24-PHAS-1840	2	10107	nc	na	-	-
24-PHAS-1843	1	8342	nc	na	-	-
24-PHAS-1845	1	10000	nc	miR2275	-	-
24-PHAS-1846	7	26137	nc	na	-	-
24-PHAS-1848	157	441408	nc	na	-	-
24-PHAS-1849	0	11227	nc	na	-	-
24-PHAS-1850	1	2083	nc	miR2275	-	-
24-PHAS-1853	25	57926	nc	na	-	-
24-PHAS-1855	0	2052	nc	na	-	-
24-PHAS-1857	4	4582	nc	miR2275	-	-
24-PHAS-186	3	12092	nc	na	-	-
24-PHAS-1862	0	5100	nc	na	-	-
24-PHAS-1865	49	97744	nc	na	-	-
24-PHAS-1866	0	9360	nc	na	-	-
24-PHAS-1867	0	2221	nc	miR2275	-	-
24-PHAS-1868	1	17191	nc	na	-	-
24-PHAS-1870	3	4239	nc	miR2275	-	-
24-PHAS-1878	71	253922	nc	miR2275	-	-
24-PHAS-1879	0	2910	nc	na	-	-
24-PHAS-1880	1	7689	nc	na	-	-
24-PHAS-1882	11	27730	nc	miR2275	-	-
24-PHAS-1883	4	9381	nc	na	-	-
24-PHAS-1884	17	51864	nc	miR2275	-	-
24-PHAS-1886	0	2295	nc	miR2275	-	-
24-PHAS-189	8	42148	nc	na	-	-
24-PHAS-1890	1	19713	nc	na	-	-
24-PHAS-1891	0	3400	nc	miR2275	-	-
24-PHAS-1897	5	15518	nc	na	-	-
24-PHAS-19	21	54191	nc	na	-	foldback L-to-B
24-PHAS-190	2	6800	nc	na	-	-
24-PHAS-1904	0	4144	nc	na	-	-
24-PHAS-1906	48	126567	nc	na	-	-
24-PHAS-1907	1	10734	nc	na	-	-
24-PHAS-191	4	5166	nc	na	-	-
24-PHAS-1910	20	63345	nc	na	-	-
24-PHAS-1921	4	8244	nc	na	-	-
24-PHAS-1925	5	14710	nc	na	-	-
24-PHAS-1926	147	680488	nc	na	-	-
24-PHAS-1927	4	7748	nc	na	-	-
24-PHAS-193	0	2300	nc	na	-	-
24-PHAS-1930	1	3789	nc	na	-	-
24-PHAS-1937	0	5075	nc	na	-	-
24-PHAS-1939	0	8966	nc	na	-	-
24-PHAS-194	3	6762	nc	miR2275	-	-
24-PHAS-1941	1	3152	nc	na	-	-
24-PHAS-1948	0	2330	nc	miR2275	-	-
24-PHAS-1949	0	6631	nc	na	-	-
24-PHAS-195	2	9831	nc	na	-	-
24-PHAS-1950	2	7232	nc	na	-	-
24-PHAS-1953	0	3331	nc	na	-	-
24-PHAS-1954	1	19032	nc	na	-	-
24-PHAS-1957	5	5124	nc	na	-	-
24-PHAS-1958	2	12643	nc	miR2275	-	-
24-PHAS-1959	90	442401	nc	na	-	foldback
24-PHAS-196	16	37232	nc	na	-	-
24-PHAS-1961	1	5324	nc	na	-	-
24-PHAS-1962	10	55822	nc	miR2275	-	-
24-PHAS-1966	4	4652	nc	na	-	-
24-PHAS-1968	56	209095	nc	miR2275	-	-
24-PHAS-1969	1	9022	nc	miR2275	-	-
24-PHAS-1979	39	230776	nc	miR2275	-	-
24-PHAS-1980	1	13304	nc	miR2275	-	-
24-PHAS-1982	1	36878	nc	miR2275	-	-
24-PHAS-1984	1	3141	nc	na	-	-
24-PHAS-1985	0	2018	nc	na	-	-
24-PHAS-1986	1	9836	nc	na	-	-
24-PHAS-1989	0	1568	nc	miR2275	-	-
24-PHAS-199	7	19395	nc	miR2275	-	-
24-PHAS-1990	23	78490	nc	miR2275	-	-
24-PHAS-1992	1	2624	nc	miR2275	-	-
24-PHAS-1996	0	1009	nc	na	-	-
24-PHAS-1997	4	14297	nc	miR2275	-	foldback
24-PHAS-20	6	15653	nc	miR2275	-	-
24-PHAS-200	3	22194	nc	miR2275	-	-
24-PHAS-2002	5	15650	nc	na	-	-
24-PHAS-2004	0	1206	nc	na	-	-
24-PHAS-2011	0	4670	nc	miR2275	-	-
24-PHAS-2014	5	29778	nc	na	-	-
24-PHAS-2017	1	3711	nc	na	-	-
24-PHAS-2018	9	32347	nc	na	-	foldback
24-PHAS-2020	3	23937	nc	na	-	-
24-PHAS-2023	4	21379	nc	na	-	-
24-PHAS-2024	3	5096	nc	na	-	-
24-PHAS-2028	2	11996	nc	na	-	-
24-PHAS-2029	2	2933	nc	na	-	-
24-PHAS-2032	2	2133	nc	na	-	-
24-PHAS-2033	5	27489	nc	na	-	-
24-PHAS-2036	7	36093	nc	na	-	-
24-PHAS-2037	1	3217	nc	na	-	-
24-PHAS-2038	0	6873	nc	na	-	-
24-PHAS-2039	3	16861	nc	na	-	-
24-PHAS-2042	38	120962	nc	na	-	-
24-PHAS-2045	2	3195	nc	na	-	-
24-PHAS-2047	4	24297	nc	na	-	-
24-PHAS-205	1	12233	nc	na	-	-
24-PHAS-2050	5	12159	nc	miR2275	-	-
24-PHAS-2051	0	10040	nc	miR2275	-	-
24-PHAS-2052	4	7516	nc	na	-	-
24-PHAS-2053	49	165612	nc	miR2275	-	-
24-PHAS-2054	6	24966	nc	miR2275	-	-
24-PHAS-2057	8	37639	nc	na	-	-
24-PHAS-2058	0	1210	nc	na	-	-
24-PHAS-2059	0	1213	nc	miR2275	-	-
24-PHAS-206	15	68236	nc	na	-	-
24-PHAS-2061	4	23201	nc	na	-	-
24-PHAS-2062	4	9436	nc	miR2275	-	-
24-PHAS-2065	10	48183	nc	miR2275	-	-
24-PHAS-2066	3	16176	nc	na	-	-
24-PHAS-2067	17	44568	nc	na	-	-
24-PHAS-2070	1	8872	nc	miR2275	-	-
24-PHAS-2071	1	2789	nc	na	-	-
24-PHAS-2072	0	1659	nc	na	-	-
24-PHAS-2074	1	2154	nc	miR2275	-	-
24-PHAS-2075	3	3192	nc	na	-	-
24-PHAS-2076	5	14638	nc	na	-	-
24-PHAS-2081	0	2142	nc	na	-	-
24-PHAS-2083	3	4961	nc	miR2275	-	-
24-PHAS-2087	1	10986	nc	na	-	-
24-PHAS-209	16	38491	nc	na	-	-
24-PHAS-2090	3	28581	nc	na	-	-
24-PHAS-2092	1	1894	nc	na	-	-
24-PHAS-2094	3	23215	nc	na	-	-
24-PHAS-2096	1	2708	nc	na	-	-
24-PHAS-2099	0	7965	nc	na	-	-
24-PHAS-21	1	6522	nc	na	-	-
24-PHAS-2100	0	11336	nc	miR2275	-	-
24-PHAS-2101	3	22763	nc	na	-	-
24-PHAS-2102	34	112983	nc	na	-	-
24-PHAS-2104	6	14176	nc	miR2275	-	-
24-PHAS-2105	0	6510	nc	na	-	-
24-PHAS-2106	2	1136	nc	na	-	-
24-PHAS-2107	1	7108	nc	miR2275	-	-
24-PHAS-2108	7	15291	nc	miR2275	-	-
24-PHAS-2109	1	8597	nc	na	-	-
24-PHAS-2113	55	205104	nc	na	-	-
24-PHAS-2117	1	4150	nc	miR2275	-	-
24-PHAS-212	1	10498	nc	na	-	-
24-PHAS-2126	4	24512	nc	na	-	-
24-PHAS-2129	13	31291	nc	na	-	-
24-PHAS-213	14	52695	nc	na	-	-
24-PHAS-2131	7	10060	nc	na	-	-
24-PHAS-2132	3	1197	nc	miR2275	-	-
24-PHAS-2134	7	33407	nc	na	-	-
24-PHAS-2135	4	6065	nc	na	-	-
24-PHAS-2138	52	196837	nc	miR2275	-	-
24-PHAS-2140	2	16747	nc	na	-	-
24-PHAS-2141	0	3939	nc	na	-	-
24-PHAS-2142	2	16211	nc	na	-	-
24-PHAS-2148	1	4432	nc	na	-	-
24-PHAS-2151	0	1190	co	na	Serine/threonine-protein kinase HT1	-
24-PHAS-2152	4	10893	nc	miR2275	-	-
24-PHAS-2153	46	189231	nc	na	-	-
24-PHAS-2154	0	508	nc	na	-	-
24-PHAS-2156	0	1948	nc	na	-	-
24-PHAS-2158	9	38825	nc	na	-	-
24-PHAS-2159	1	8682	nc	na	-	-
24-PHAS-2162	0	3608	nc	na	-	-
24-PHAS-2167	51	221128	nc	miR2275	-	-
24-PHAS-2168	12	49675	nc	na	-	-
24-PHAS-2169	1	7060	nc	miR2275	-	-
24-PHAS-2172	3	6015	nc	na	-	-
24-PHAS-2176	2	1569	nc	miR2275	-	-
24-PHAS-2187	0	2704	nc	miR2275	-	-
24-PHAS-2188	14	33711	nc	na	-	-
24-PHAS-219	3	14691	nc	na	-	-
24-PHAS-2190	33	98983	nc	na	-	-
24-PHAS-2193	6	11878	nc	na	-	-
24-PHAS-2195	7	12943	nc	miR2275	-	-
24-PHAS-2196	1	7727	nc	miR2275	-	-
24-PHAS-2198	12	48241	nc	na	-	-
24-PHAS-220	14	59316	nc	miR2275	-	-
24-PHAS-2201	10	32684	nc	na	-	-
24-PHAS-2204	18	59578	nc	na	-	-
24-PHAS-2207	2	4496	nc	na	-	-
24-PHAS-2208	0	3484	nc	na	-	-
24-PHAS-2212	11	27692	nc	miR2275	-	-
24-PHAS-2214	3	6003	nc	na	-	-
24-PHAS-2215	3	6964	nc	na	-	-
24-PHAS-2216	14	34808	nc	na	-	-
24-PHAS-2218	319	1000206	nc	na	-	-
24-PHAS-222	1	6774	nc	na	-	-
24-PHAS-2220	3	7813	nc	na	-	-
24-PHAS-2228	31	110976	nc	miR2275	-	-
24-PHAS-223	33	146190	nc	miR2275	-	-
24-PHAS-2231	0	13642	nc	miR2275	-	-
24-PHAS-2233	0	2965	nc	na	-	-
24-PHAS-2235	9	29872	nc	na	-	-
24-PHAS-2236	3	7080	nc	na	-	-
24-PHAS-2237	0	1703	nc	na	-	-
24-PHAS-2239	1	1485	nc	miR2275	-	-
24-PHAS-2243	3	9188	nc	na	-	-
24-PHAS-2244	56	176616	nc	na	-	-
24-PHAS-2246	4	14466	nc	na	-	-
24-PHAS-2251	9	25093	nc	na	-	-
24-PHAS-2252	6	15160	nc	miR2275	-	-
24-PHAS-2253	3	2831	nc	na	-	-
24-PHAS-2255	1	5000	nc	na	-	-
24-PHAS-2256	7	18515	nc	na	-	-
24-PHAS-2257	148	343757	nc	na	-	-
24-PHAS-2261	1	8210	nc	na	-	-
24-PHAS-2262	7	31327	nc	na	-	-
24-PHAS-2266	7	16518	nc	na	-	-
24-PHAS-2271	9	46586	nc	na	-	-
24-PHAS-2272	1	2134	nc	na	-	-
24-PHAS-2274	1	6617	nc	na	-	-
24-PHAS-228	11	51625	nc	miR2275	-	-
24-PHAS-2281	0	1045	nc	na	-	-
24-PHAS-2282	4	10752	nc	na	-	-
24-PHAS-2285	1	2525	nc	na	-	-
24-PHAS-2291	0	1180	nc	miR2275	-	-
24-PHAS-2293	1	5334	nc	miR2275	-	-
24-PHAS-2294	0	8986	nc	miR2275	-	-
24-PHAS-2295	0	1306	nc	miR2275	-	-
24-PHAS-2296	0	2067	nc	na	-	-
24-PHAS-2297	22	65579	nc	na	-	-
24-PHAS-2298	4	3956	nc	na	-	-
24-PHAS-2299	7	11675	nc	na	-	-
24-PHAS-23	10	15998	nc	miR2275	-	foldback
24-PHAS-23	4	33622	nc	na	-	foldback
24-PHAS-230	35	71920	nc	na	-	-
24-PHAS-2303	4	5166	nc	na	-	foldback
24-PHAS-2307	2	8293	nc	na	-	-
24-PHAS-2309	24	72366	nc	na	-	-
24-PHAS-231	6	38668	nc	miR2275	-	-
24-PHAS-2314	190	638980	nc	na	-	-
24-PHAS-2315	0	5812	nc	na	-	-
24-PHAS-2316	1	2806	nc	miR2275	-	-
24-PHAS-2321	8	25404	nc	miR2275	-	-
24-PHAS-2322	0	10413	nc	miR2275	-	-
24-PHAS-2326	3	2684	nc	na	-	-
24-PHAS-2331	0	1166	nc	na	-	-
24-PHAS-2336	2	13508	nc	na	-	foldback
24-PHAS-2338	0	3440	nc	na	-	-
24-PHAS-2340	0	6239	nc	na	-	-
24-PHAS-2341	0	4765	nc	miR2275	-	-
24-PHAS-2342	0	5974	nc	na	-	-
24-PHAS-2343	45	143237	nc	miR2275	-	-
24-PHAS-2345	0	1319	nc	miR2275	-	-
24-PHAS-2348	1	2089	nc	na	-	-
24-PHAS-2349	6	24234	nc	miR2275	-	-
24-PHAS-235	8	14031	nc	miR2275	-	-
24-PHAS-2354	9	27277	nc	miR2275	-	-
24-PHAS-2356	0	3259	nc	na	-	-
24-PHAS-2357	11	24614	nc	na	-	-
24-PHAS-2359	5	54734	nc	miR2275	-	-
24-PHAS-2360	1	11487	nc	na	-	-
24-PHAS-2363	1	3877	nc	miR2275	-	-
24-PHAS-2364	0	1408	nc	na	-	-
24-PHAS-2366	2	9624	nc	na	-	-
24-PHAS-237	0	1853	nc	miR2275	-	-
24-PHAS-2372	0	3040	nc	na	-	-
24-PHAS-2373	9	42871	nc	na	-	-
24-PHAS-2374	1	1827	nc	na	-	-
24-PHAS-2375	1	3997	nc	na	-	-
24-PHAS-2376	4	16875	nc	miR2275	-	-
24-PHAS-2377	10	43250	nc	miR2275	-	foldback
24-PHAS-2378	6	13942	nc	na	-	-
24-PHAS-2379	9	33775	nc	na	-	foldback
24-PHAS-238	0	3167	nc	miR2275	-	-
24-PHAS-2381	5	13133	nc	na	-	-
24-PHAS-2384	2	5958	nc	miR2275	-	-
24-PHAS-2386	10	43189	nc	na	-	-
24-PHAS-2392	1	3023	nc	miR2275	-	-
24-PHAS-2393	5	6946	nc	miR2275	-	-
24-PHAS-2395	0	3364	nc	na	-	-
24-PHAS-2396	9	53732	nc	miR2275	-	-
24-PHAS-2398	26	53704	nc	miR2275	-	foldback
24-PHAS-2400	1	994	nc	na	-	-
24-PHAS-2402	1	4514	nc	na	-	-
24-PHAS-2404	9	46819	nc	na	-	-
24-PHAS-2405	6	11925	nc	na	-	-
24-PHAS-2407	0	1501	nc	na	-	-
24-PHAS-241	8	27977	nc	na	-	-
24-PHAS-2414	1	3642	nc	na	-	-
24-PHAS-2415	8	14929	nc	na	-	-
24-PHAS-2416	10	14271	nc	miR2275	-	-
24-PHAS-2418	1	5518	nc	na	-	-
24-PHAS-2422	1	7910	nc	na	-	-
24-PHAS-2424	8	24285	nc	na	-	-
24-PHAS-2425	0	1035	nc	na	-	-
24-PHAS-243	3	15462	nc	na	-	-
24-PHAS-2430	5	10399	nc	na	-	-
24-PHAS-2432	14	43202	nc	na	-	-
24-PHAS-2436	22	92057	nc	na	-	-
24-PHAS-2437	2	7952	nc	na	-	-
24-PHAS-2438	7	23185	nc	na	-	-
24-PHAS-2439	1	7948	nc	na	-	-
24-PHAS-244	0	2135	nc	na	-	-
24-PHAS-2440	19	82716	nc	na	-	-
24-PHAS-2441	0	1546	nc	na	-	-
24-PHAS-2443	2	8472	nc	na	-	-
24-PHAS-2445	15	72834	nc	miR2275	-	-
24-PHAS-2446	3	6804	nc	miR2275	-	-
24-PHAS-2447	4	15356	nc	na	-	-
24-PHAS-2449	0	1623	nc	miR2275	-	-
24-PHAS-245	0	13590	nc	na	-	-
24-PHAS-2454	0	1870	nc	na	-	-
24-PHAS-2455	24	82090	nc	na	-	-
24-PHAS-2458	0	969	nc	na	-	-
24-PHAS-2459	0	3327	nc	na	-	-
24-PHAS-2460	1	11441	nc	miR2275	-	-
24-PHAS-2461	0	960	nc	miR2275	-	-
24-PHAS-2464	0	747	nc	na	-	-
24-PHAS-2466	159	580971	nc	miR2275	-	-
24-PHAS-2470	0	6320	nc	miR2275	-	-
24-PHAS-2472	16	27414	nc	na	-	-
24-PHAS-2475	8	13862	nc	miR2275	-	-
24-PHAS-2476	36	98464	nc	na	-	-
24-PHAS-2479	0	1542	nc	na	-	-
24-PHAS-2484	0	2789	nc	miR2275	-	-
24-PHAS-249	4	11459	nc	na	-	-
24-PHAS-2490	10	25753	nc	na	-	-
24-PHAS-2492	3	2653	nc	na	-	-
24-PHAS-2494	1	8293	nc	na	-	-
24-PHAS-2496	0	4606	nc	na	-	foldback
24-PHAS-2498	0	6353	nc	na	-	-
24-PHAS-25	19	33691	nc	miR2275	-	foldback
24-PHAS-25	9	41575	nc	miR2275	-	foldback
24-PHAS-2500	0	2080	nc	miR2275	-	-
24-PHAS-2501	26	88738	nc	na	-	-
24-PHAS-2502	4	7704	nc	miR2275	-	-
24-PHAS-2503	0	9240	nc	miR2275	-	-
24-PHAS-2505	0	1257	nc	na	-	-
24-PHAS-2507	20	82561	nc	na	-	-
24-PHAS-2508	2	13840	nc	miR2275	-	-
24-PHAS-2510	0	5959	nc	na	-	-
24-PHAS-2512	7	27755	nc	miR2275	-	-
24-PHAS-2515	1	25203	nc	na	-	-
24-PHAS-2516	0	1140	nc	na	-	-
24-PHAS-2520	94	269385	nc	na	-	-
24-PHAS-2522	3	23787	nc	na	-	-
24-PHAS-2529	20	110991	nc	miR2275	-	foldback
24-PHAS-2532	17	27609	nc	na	-	-
24-PHAS-2533	22	28615	nc	na	-	-
24-PHAS-2534	23	72230	nc	na	-	-
24-PHAS-2535	3	8570	nc	na	-	-
24-PHAS-2536	0	833	nc	miR2275	-	-
24-PHAS-2537	0	3443	nc	na	-	-
24-PHAS-2539	2	5759	nc	na	-	-
24-PHAS-254	1	2443	nc	na	-	-
24-PHAS-2541	15	24713	nc	na	-	-
24-PHAS-2542	1	9073	nc	miR2275	-	-
24-PHAS-2543	1	3463	nc	na	-	-
24-PHAS-2544	5	11182	nc	na	-	-
24-PHAS-2547	1	3175	nc	na	-	-
24-PHAS-2548	0	1222	nc	na	-	-
24-PHAS-2550	180	442292	nc	na	-	-
24-PHAS-2552	22	91770	nc	na	-	-
24-PHAS-2553	95	332937	nc	na	-	-
24-PHAS-2557	14	52755	nc	na	-	-
24-PHAS-2562	4	40134	nc	miR2275	-	-
24-PHAS-2565	1	4326	nc	na	-	-
24-PHAS-2566	53	188368	nc	na	-	-
24-PHAS-257	5	4904	nc	na	-	-
24-PHAS-2575	1	8493	co	na	Thylakoid lumenal 16.5 kDa protein, chloroplastic	-
24-PHAS-2578	2	10011	nc	miR2275	-	-
24-PHAS-2579	3	9637	nc	miR2275	-	-
24-PHAS-258	1	5318	nc	na	-	-
24-PHAS-2581	1	7872	nc	na	-	-
24-PHAS-2583	0	884	nc	na	-	-
24-PHAS-2587	0	3259	nc	na	-	-
24-PHAS-259	2	7926	nc	miR2275	-	-
24-PHAS-2592	0	1822	nc	na	-	-
24-PHAS-2594	9	27526	nc	miR2275	-	-
24-PHAS-2595	2	16180	nc	na	-	-
24-PHAS-2596	0	4820	nc	miR2275	-	-
24-PHAS-2597	0	4897	nc	miR2275	-	-
24-PHAS-2598	1	4380	nc	miR2275	-	-
24-PHAS-2601	1	5648	nc	na	-	-
24-PHAS-2604	2	15758	nc	na	-	-
24-PHAS-2606	0	11016	nc	na	-	-
24-PHAS-2612	0	3176	nc	na	-	-
24-PHAS-2615	17	106514	nc	na	-	-
24-PHAS-262	1	6156	nc	miR2275	-	-
24-PHAS-2622	21	123149	nc	na	-	-
24-PHAS-2623	18	50588	nc	na	-	-
24-PHAS-2625	2	32356	nc	na	-	-
24-PHAS-2626	237	790255	nc	na	-	-
24-PHAS-2627	0	3044	nc	na	-	-
24-PHAS-2628	3	9443	nc	miR2275	-	-
24-PHAS-2629	66	232529	nc	miR2275	-	-
24-PHAS-263	0	2561	nc	na	-	-
24-PHAS-2631	0	889	nc	na	-	-
24-PHAS-2632	2	5651	nc	na	-	-
24-PHAS-2634	60	148700	nc	na	-	-
24-PHAS-2635	0	8475	nc	miR2275	-	-
24-PHAS-2638	0	1670	nc	na	-	-
24-PHAS-2639	3	20466	nc	miR2275	-	-
24-PHAS-264	1	1083	nc	miR2275	-	-
24-PHAS-2644	4	19343	nc	na	-	-
24-PHAS-2647	0	960	nc	na	-	-
24-PHAS-2648	1	6216	nc	na	-	-
24-PHAS-265	0	2855	nc	na	-	-
24-PHAS-2650	2	11783	nc	miR2275	-	-
24-PHAS-2651	41	185410	nc	miR2275	-	-
24-PHAS-2658	3	8136	nc	miR2275	-	-
24-PHAS-2659	7	19972	nc	na	-	-
24-PHAS-2661	17	59960	nc	miR2275	-	-
24-PHAS-2662	4	12160	nc	na	-	-
24-PHAS-2663	0	989	nc	na	-	-
24-PHAS-2666	26	194534	nc	na	-	-
24-PHAS-2668	1	7179	nc	na	-	-
24-PHAS-2669	16	78515	nc	miR2275	-	-
24-PHAS-267	7	65622	nc	na	-	-
24-PHAS-2670	20	60562	nc	na	-	-
24-PHAS-2671	0	4863	nc	na	-	-
24-PHAS-2672	1	6006	nc	na	-	-
24-PHAS-2674	0	4946	nc	na	-	-
24-PHAS-2675	4	41590	up	miR2275	-	-
24-PHAS-2676	2	3626	nc	miR2275	-	-
24-PHAS-2678	1	5821	nc	na	-	-
24-PHAS-2679	3	21162	nc	na	-	-
24-PHAS-2681	1	7267	nc	miR2275	-	-
24-PHAS-2682	6	17650	nc	na	-	-
24-PHAS-2684	0	4228	nc	na	-	-
24-PHAS-2685	2	4401	nc	na	-	-
24-PHAS-2688	2	6855	nc	miR2275	-	-
24-PHAS-2689	106	537823	nc	na	-	foldback
24-PHAS-2690	0	1494	nc	na	-	-
24-PHAS-2693	7	16179	nc	na	-	-
24-PHAS-2694	1	7524	nc	na	-	-
24-PHAS-2699	3	17209	nc	miR2275	-	-
24-PHAS-27	7	20096	nc	miR2275	-	-
24-PHAS-270	4	40392	nc	na	-	-
24-PHAS-2700	22	73573	nc	na	-	-
24-PHAS-2705	5	39072	nc	miR2275	-	-
24-PHAS-271	10	41402	nc	na	-	-
24-PHAS-2713	4	11299	nc	miR2275	-	-
24-PHAS-2714	1	2659	nc	na	-	-
24-PHAS-2717	3	15874	nc	na	-	-
24-PHAS-2718	23	56990	nc	na	-	-
24-PHAS-272	3	14478	nc	na	-	-
24-PHAS-2722	0	2448	nc	na	-	-
24-PHAS-2729	4	15031	nc	na	-	-
24-PHAS-2732	7	50960	nc	na	-	-
24-PHAS-2733	9	38057	nc	na	-	-
24-PHAS-2735	3	12197	nc	na	-	-
24-PHAS-2737	4	4624	nc	na	-	-
24-PHAS-274	0	5020	nc	na	-	-
24-PHAS-2741	1	5683	nc	na	-	-
24-PHAS-2742	2	1817	nc	miR2275	-	-
24-PHAS-2743	11	41922	nc	miR2275	-	foldback
24-PHAS-2744	0	6654	nc	miR2275	-	-
24-PHAS-2746	0	1290	nc	na	-	-
24-PHAS-2748	0	4174	nc	miR2275	-	-
24-PHAS-2749	66	202313	nc	na	-	-
24-PHAS-2750	6	11831	nc	na	-	-
24-PHAS-2751	15	130275	nc	na	-	-
24-PHAS-2752	2	13476	nc	na	-	-
24-PHAS-2756	25	110251	nc	na	-	-
24-PHAS-2758	3	8775	nc	na	-	-
24-PHAS-2759	9	27621	nc	na	-	-
24-PHAS-276	0	3115	nc	na	-	-
24-PHAS-2761	2	2989	nc	na	-	-
24-PHAS-2762	1	6760	nc	na	-	-
24-PHAS-2765	5	29274	nc	na	-	foldback L-to-B
24-PHAS-2766	3	8280	nc	na	-	-
24-PHAS-2769	3	17753	nc	na	-	-
24-PHAS-2770	0	5873	nc	na	-	-
24-PHAS-2779	1	3890	nc	miR2275	-	-
24-PHAS-278	5	22385	nc	na	-	-
24-PHAS-2780	6	22496	nc	na	-	-
24-PHAS-2782	0	1685	nc	na	-	-
24-PHAS-2789	4	5316	nc	na	-	-
24-PHAS-279	0	6563	nc	na	-	-
24-PHAS-2792	0	13242	nc	na	-	-
24-PHAS-2794	4	8568	nc	na	-	-
24-PHAS-2796	21	62879	nc	miR2275	-	-
24-PHAS-2799	17	54443	nc	miR2275	-	-
24-PHAS-280	1	2677	nc	na	-	-
24-PHAS-2800	0	1462	nc	na	-	-
24-PHAS-2801	93	275314	nc	na	-	-
24-PHAS-2802	8	54480	nc	na	-	-
24-PHAS-2803	16	61928	nc	miR2275	-	-
24-PHAS-2806	38	176352	nc	na	-	-
24-PHAS-281	1	2143	nc	miR2275	-	-
24-PHAS-2810	0	1119	nc	na	-	-
24-PHAS-2811	3	9615	nc	na	-	-
24-PHAS-2812	0	12944	nc	na	-	-
24-PHAS-2814	9	27307	nc	miR2275	-	-
24-PHAS-2815	0	12068	nc	miR2275	-	-
24-PHAS-2816	13	31633	nc	miR2275	-	-
24-PHAS-2817	45	177889	nc	miR2275	-	-
24-PHAS-2819	11	48768	nc	na	-	-
24-PHAS-2822	0	1053	nc	na	-	-
24-PHAS-283	44	121398	nc	miR2275	-	-
24-PHAS-2831	29	115235	nc	miR2275	-	-
24-PHAS-2839	10	23133	nc	miR2275	-	-
24-PHAS-284	11	33784	nc	na	-	-
24-PHAS-2845	2	6231	nc	miR2275	-	-
24-PHAS-2847	6	12487	nc	miR2275	-	-
24-PHAS-2849	24	73420	nc	miR2275	-	-
24-PHAS-2850	0	6795	nc	na	-	-
24-PHAS-2853	32	145941	nc	miR2275	-	-
24-PHAS-2854	21	43083	nc	na	-	-
24-PHAS-2855	4	10484	nc	miR2275	-	-
24-PHAS-2856	0	894	nc	na	-	-
24-PHAS-2857	22	35429	nc	miR2275	-	-
24-PHAS-286	3	10460	nc	na	-	-
24-PHAS-2860	0	6117	nc	miR2275	-	-
24-PHAS-2866	2	12217	nc	na	-	-
24-PHAS-2867	1	4438	nc	na	-	-
24-PHAS-287	2	7570	nc	na	-	-
24-PHAS-2871	0	14505	nc	miR2275	-	-
24-PHAS-2874	21	48953	nc	na	-	-
24-PHAS-2875	2	33193	nc	miR2275	-	-
24-PHAS-2876	0	4894	nc	na	-	-
24-PHAS-2882	0	9165	nc	na	-	-
24-PHAS-2883	2	6791	nc	na	-	-
24-PHAS-2884	1	6218	nc	na	-	-
24-PHAS-2885	17	69623	nc	miR2275	-	-
24-PHAS-2887	4	12549	nc	na	-	-
24-PHAS-289	2	19202	nc	na	-	-
24-PHAS-2890	0	1667	nc	na	-	-
24-PHAS-2891	2	13074	nc	miR2275	-	-
24-PHAS-2893	7	8134	nc	na	-	-
24-PHAS-2894	1	4141	nc	na	-	-
24-PHAS-2895	0	4148	nc	na	-	-
24-PHAS-2897	0	6902	nc	na	-	-
24-PHAS-29	144	587022	nc	miR2275	-	foldback
24-PHAS-290	5	29451	nc	na	-	-
24-PHAS-2900	0	2890	nc	na	-	-
24-PHAS-2901	66	205181	nc	na	-	-
24-PHAS-2902	3	1515	nc	na	-	-
24-PHAS-2904	21	51983	nc	miR2275	-	-
24-PHAS-2906	0	3242	nc	miR2275	-	-
24-PHAS-2910	0	960	nc	na	-	-
24-PHAS-2911	0	2091	nc	na	-	-
24-PHAS-2912	9	36095	nc	na	-	-
24-PHAS-2917	8	13684	nc	na	-	-
24-PHAS-2919	0	1319	nc	na	-	-
24-PHAS-292	7	16711	nc	na	-	-
24-PHAS-2921	1	18362	nc	na	-	-
24-PHAS-2922	4	10596	nc	na	-	-
24-PHAS-2923	18	49331	nc	na	-	-
24-PHAS-2925	0	966	nc	na	-	-
24-PHAS-2927	0	2145	nc	na	-	-
24-PHAS-2931	43	161505	nc	miR2275	-	-
24-PHAS-2932	1	2564	nc	na	-	-
24-PHAS-2937	58	197373	nc	na	-	-
24-PHAS-2939	3	28028	nc	na	-	-
24-PHAS-2940	1	4756	nc	na	-	-
24-PHAS-2942	0	1545	nc	na	-	-
24-PHAS-2946	0	2067	nc	na	-	-
24-PHAS-2947	4	18512	nc	na	-	-
24-PHAS-295	49	176360	nc	na	-	-
24-PHAS-2950	1	4181	nc	na	-	-
24-PHAS-2953	1	5356	nc	na	-	-
24-PHAS-2954	10	26789	nc	na	-	-
24-PHAS-2955	4	11339	nc	miR2275	-	-
24-PHAS-2956	3	12353	nc	miR2275	-	-
24-PHAS-2958	2	6546	nc	na	-	-
24-PHAS-2959	0	5584	nc	na	-	-
24-PHAS-296	4	4595	nc	na	-	-
24-PHAS-2960	0	2156	nc	na	-	-
24-PHAS-2961	0	4187	nc	na	-	-
24-PHAS-2962	6	12658	nc	miR2275	-	-
24-PHAS-2964	0	1630	nc	miR2275	-	-
24-PHAS-2965	1	2247	nc	na	-	-
24-PHAS-2969	3	7020	nc	na	-	-
24-PHAS-2972	2	3459	nc	na	-	-
24-PHAS-2975	7	37663	nc	na	-	-
24-PHAS-2976	1	6765	nc	na	-	-
24-PHAS-2979	6	30164	nc	na	-	-
24-PHAS-2981	5	32790	nc	na	-	-
24-PHAS-2983	13	39752	nc	na	-	-
24-PHAS-2985	3	9270	nc	na	-	-
24-PHAS-2986	2	10085	nc	na	-	-
24-PHAS-2989	27	61095	nc	na	-	-
24-PHAS-2990	9	30499	nc	na	-	-
24-PHAS-2991	1	2441	nc	na	-	-
24-PHAS-2993	6	54790	nc	miR2275	-	-
24-PHAS-2996	0	1152	nc	na	-	foldback
24-PHAS-2998	0	859	nc	na	-	-
24-PHAS-2999	5	13265	nc	na	-	-
24-PHAS-30	109	331588	nc	na	-	foldback L-to-B
24-PHAS-3000	7	57582	nc	miR2275	-	-
24-PHAS-3006	6	22975	nc	miR2275	-	-
24-PHAS-3007	1	4486	nc	na	-	-
24-PHAS-3011	8	26801	nc	na	-	-
24-PHAS-302	1	4348	nc	na	-	-
24-PHAS-3020	0	3118	nc	na	-	-
24-PHAS-3021	2	10925	nc	na	-	-
24-PHAS-3022	13	66892	nc	na	-	-
24-PHAS-3024	1	8455	nc	na	-	-
24-PHAS-3026	0	5455	nc	na	-	-
24-PHAS-3027	0	6116	nc	na	-	-
24-PHAS-3028	2	17324	nc	na	-	-
24-PHAS-303	2	3851	nc	na	-	-
24-PHAS-3031	0	1958	nc	na	-	-
24-PHAS-3032	17	52883	nc	na	-	-
24-PHAS-3036	9	40769	nc	na	-	-
24-PHAS-304	26	84732	nc	na	-	-
24-PHAS-3040	0	3187	nc	na	-	foldback
24-PHAS-3041	0	4668	nc	na	-	-
24-PHAS-3043	2	5051	nc	na	-	-
24-PHAS-3045	0	2436	nc	na	-	-
24-PHAS-3047	0	3235	nc	na	-	-
24-PHAS-3048	21	28424	nc	na	-	-
24-PHAS-305	9	44230	nc	na	-	-
24-PHAS-3054	1	1561	nc	na	-	-
24-PHAS-3058	7	6229	nc	miR2275	-	-
24-PHAS-3059	9	10883	nc	na	-	-
24-PHAS-3061	5	14449	nc	na	-	-
24-PHAS-3062	55	276273	nc	miR2275	-	-
24-PHAS-3063	0	1398	nc	na	-	-
24-PHAS-3064	0	872	nc	na	-	-
24-PHAS-3065	1	12058	nc	na	-	-
24-PHAS-3068	16	79945	nc	miR2275	-	-
24-PHAS-3069	2	12686	nc	na	-	-
24-PHAS-307	0	3760	nc	na	-	-
24-PHAS-3070	3	13320	nc	na	-	-
24-PHAS-3071	4	14492	nc	na	-	-
24-PHAS-3075	9	20773	nc	na	-	-
24-PHAS-3077	0	2982	nc	na	-	-
24-PHAS-3078	0	3219	nc	na	-	-
24-PHAS-3081	1	1345	nc	na	-	-
24-PHAS-3083	0	3591	nc	na	-	-
24-PHAS-3085	0	2192	nc	na	-	-
24-PHAS-3087	0	4255	nc	na	-	-
24-PHAS-3088	36	67911	nc	miR2275	-	-
24-PHAS-3090	16	53123	nc	na	-	-
24-PHAS-3091	1	3161	nc	miR2275	-	-
24-PHAS-3092	2	5577	nc	na	-	-
24-PHAS-3096	0	1096	nc	na	-	-
24-PHAS-3099	10	28236	nc	miR2275	-	-
24-PHAS-31	3	8136	nc	na	-	-
24-PHAS-3100	72	225373	nc	miR2275	-	-
24-PHAS-3102	0	5459	nc	na	-	-
24-PHAS-3103	8	18549	nc	na	-	-
24-PHAS-3108	22	54708	nc	miR2275	-	-
24-PHAS-3109	10	55291	nc	na	-	-
24-PHAS-3110	4	22383	nc	na	-	-
24-PHAS-3111	3	10025	nc	na	-	-
24-PHAS-3113	1	14192	nc	miR2275	-	-
24-PHAS-3114	8	21473	nc	miR2275	-	-
24-PHAS-3115	28	76674	nc	miR2275	-	-
24-PHAS-3117	5	20087	nc	na	-	-
24-PHAS-3118	2	19473	nc	miR2275	-	-
24-PHAS-3119	0	5950	nc	na	-	-
24-PHAS-312	5	26131	nc	miR2275	-	-
24-PHAS-3124	18	30452	nc	na	-	-
24-PHAS-3126	5	17548	nc	na	-	-
24-PHAS-3135	23	52025	nc	na	-	-
24-PHAS-3137	10	33641	nc	miR2275	-	-
24-PHAS-314	11	58793	nc	miR2118	-	-
24-PHAS-3143	3	11090	nc	miR2275	-	-
24-PHAS-3144	0	6321	nc	na	-	-
24-PHAS-3146	22	67928	nc	na	-	-
24-PHAS-3147	1	5920	nc	na	-	-
24-PHAS-3149	17	28836	nc	na	-	-
24-PHAS-315	4	11244	nc	na	-	-
24-PHAS-3152	19	49325	nc	na	-	-
24-PHAS-3154	0	1031	nc	na	-	-
24-PHAS-3157	1	8300	nc	na	-	-
24-PHAS-3160	1	3447	nc	miR2275	-	-
24-PHAS-3163	0	1512	nc	na	-	-
24-PHAS-3167	3	1920	nc	na	-	-
24-PHAS-3168	4	4361	nc	miR2275	-	-
24-PHAS-3170	50	143701	nc	na	-	-
24-PHAS-3171	2	6561	nc	na	-	-
24-PHAS-3174	0	2919	nc	na	-	-
24-PHAS-3180	20	134114	nc	na	-	-
24-PHAS-3181	3	13787	nc	miR2275	-	-
24-PHAS-3187	0	1746	nc	na	-	-
24-PHAS-3191	0	2230	nc	miR2275	-	-
24-PHAS-3195	0	5146	nc	na	-	-
24-PHAS-3197	0	2686	nc	na	-	-
24-PHAS-32	6	20288	nc	na	-	-
24-PHAS-3201	1	4645	nc	na	-	-
24-PHAS-3204	1	1964	nc	na	-	-
24-PHAS-3206	4	21577	nc	miR2275	-	-
24-PHAS-321	1	5141	nc	na	-	-
24-PHAS-3210	0	1489	nc	na	-	-
24-PHAS-3211	0	2881	nc	na	-	-
24-PHAS-3212	0	12141	nc	na	-	-
24-PHAS-3213	17	30020	nc	miR2275	-	-
24-PHAS-3214	24	102974	nc	miR2275	-	-
24-PHAS-3216	0	7116	nc	na	-	foldback
24-PHAS-3217	2	13658	nc	na	-	foldback
24-PHAS-3221	6	13483	nc	miR2275	-	-
24-PHAS-3223	8	44323	nc	na	-	-
24-PHAS-3226	1	5004	nc	na	-	-
24-PHAS-3229	17	49518	nc	na	-	foldback
24-PHAS-323	0	15072	nc	miR2275	-	-
24-PHAS-3230	14	48392	nc	na	-	-
24-PHAS-3231	0	1811	nc	miR2275	-	-
24-PHAS-3232	1	11216	nc	na	-	-
24-PHAS-3234	1	14719	nc	na	-	-
24-PHAS-3236	11	20957	nc	na	-	-
24-PHAS-3237	58	145576	nc	na	-	-
24-PHAS-324	3	15670	nc	miR2275	-	-
24-PHAS-3240	6	18354	nc	na	-	-
24-PHAS-3241	0	14762	nc	na	-	-
24-PHAS-3242	6	24804	nc	na	-	-
24-PHAS-3245	8	40522	nc	na	-	-
24-PHAS-3246	14	62078	nc	miR2275	-	-
24-PHAS-3248	0	1572	nc	miR2275	-	-
24-PHAS-3250	8	38160	nc	na	-	-
24-PHAS-3253	1	5857	nc	miR2275	-	-
24-PHAS-3256	0	1694	nc	miR2275	-	-
24-PHAS-3259	3	10678	nc	miR2275	-	-
24-PHAS-326	0	1366	nc	na	-	-
24-PHAS-3262	0	1888	nc	miR2275	-	-
24-PHAS-3266	4	31420	nc	na	-	-
24-PHAS-3267	0	886	nc	na	-	-
24-PHAS-3268	2	31347	nc	na	-	-
24-PHAS-3271	19	48401	nc	na	-	-
24-PHAS-3272	0	2872	nc	na	-	-
24-PHAS-3274	14	34399	nc	na	-	-
24-PHAS-3275	0	1583	nc	na	-	-
24-PHAS-3276	18	66291	nc	na	-	-
24-PHAS-328	1	952	nc	na	-	-
24-PHAS-3283	0	8627	nc	na	-	-
24-PHAS-3284	0	2455	nc	na	-	-
24-PHAS-3287	0	10630	nc	miR2275	-	-
24-PHAS-329	0	1057	nc	na	-	-
24-PHAS-3292	4	17169	nc	na	-	-
24-PHAS-3294	4	18980	nc	miR2275	-	-
24-PHAS-3299	0	5614	nc	na	-	-
24-PHAS-330	7	9119	nc	miR2275	-	-
24-PHAS-3301	17	66866	nc	na	-	-
24-PHAS-3304	0	1679	nc	na	-	-
24-PHAS-3305	2	12820	nc	na	-	-
24-PHAS-3310	1	9935	nc	miR2275	-	-
24-PHAS-3312	6	12281	nc	na	-	-
24-PHAS-3316	3	18927	nc	na	-	-
24-PHAS-3317	0	8100	nc	na	-	-
24-PHAS-3320	2	2322	nc	miR2275	-	foldback
24-PHAS-3322	1	1105	up	na	-	-
24-PHAS-3323	2	14120	nc	na	-	-
24-PHAS-3324	26	48164	nc	na	-	-
24-PHAS-3325	1	8060	nc	miR2275	-	-
24-PHAS-3328	1	27460	nc	na	-	-
24-PHAS-3329	0	1782	nc	na	-	-
24-PHAS-333	0	1276	nc	na	-	-
24-PHAS-3330	1	2383	nc	na	-	-
24-PHAS-3331	0	4900	nc	miR2275	-	-
24-PHAS-3338	9	23944	nc	miR2275	-	-
24-PHAS-3339	22	106380	nc	miR2275	-	-
24-PHAS-334	3	1444	nc	miR2275	-	-
24-PHAS-3340	0	8551	nc	miR2275	-	-
24-PHAS-3342	0	1207	nc	miR2275	-	-
24-PHAS-3344	64	224676	nc	na	-	-
24-PHAS-3345	0	2926	nc	miR2275	-	-
24-PHAS-3346	5	24884	nc	miR2275	-	-
24-PHAS-3347	2	12915	nc	na	-	-
24-PHAS-3348	61	249210	nc	na	-	-
24-PHAS-3349	0	1015	nc	na	-	-
24-PHAS-3352	13	37459	nc	na	-	-
24-PHAS-3353	0	1848	nc	na	-	-
24-PHAS-3354	4	11615	nc	na	-	-
24-PHAS-3358	58	200284	nc	na	-	-
24-PHAS-3359	5	27837	nc	miR2275	-	-
24-PHAS-3360	30	95587	nc	miR2275	-	-
24-PHAS-3363	5	17962	nc	miR2275	-	-
24-PHAS-3365	30	90488	nc	na	-	-
24-PHAS-3372	4	22205	nc	na	-	-
24-PHAS-3374	0	10081	nc	miR2275	-	-
24-PHAS-3376	1	5273	nc	na	-	-
24-PHAS-3377	4	14074	nc	na	-	-
24-PHAS-3378	29	104620	nc	miR2275	-	-
24-PHAS-3380	0	1039	nc	na	-	-
24-PHAS-3385	3	16382	nc	na	-	-
24-PHAS-3387	12	33690	nc	na	-	-
24-PHAS-3392	0	2997	nc	na	-	-
24-PHAS-3393	3	5307	nc	na	-	-
24-PHAS-3398	4	10737	nc	na	-	-
24-PHAS-3399	15	43530	nc	na	-	-
24-PHAS-34	4	35290	nc	na	-	foldback
24-PHAS-3400	1	1371	nc	na	-	-
24-PHAS-3402	14	87443	nc	miR2275	-	-
24-PHAS-3403	1	2438	nc	na	-	-
24-PHAS-3404	0	1023	nc	na	-	-
24-PHAS-341	5	17039	nc	miR2275	-	-
24-PHAS-3410	21	63289	nc	miR2275	-	-
24-PHAS-3412	0	1804	nc	miR2275	-	-
24-PHAS-3415	1	5706	nc	na	-	-
24-PHAS-3417	23	127930	nc	miR2275	-	-
24-PHAS-3422	0	3036	nc	na	-	-
24-PHAS-3426	1	12987	nc	miR2275	-	-
24-PHAS-343	1	7861	nc	na	-	-
24-PHAS-3431	10	26431	nc	na	-	-
24-PHAS-3433	1	4407	nc	na	-	-
24-PHAS-3437	11	42057	nc	miR2275	-	-
24-PHAS-3439	2	7956	nc	na	-	-
24-PHAS-3440	2	3545	nc	na	-	-
24-PHAS-3442	91	257642	nc	miR2275	-	-
24-PHAS-3443	0	2394	nc	na	-	-
24-PHAS-3444	1	6375	nc	na	-	-
24-PHAS-3446	0	12237	nc	na	-	-
24-PHAS-3447	0	9884	nc	na	-	foldback
24-PHAS-3448	33	86622	nc	na	-	-
24-PHAS-345	2	6225	nc	na	-	-
24-PHAS-3450	1	11432	nc	miR2275	-	-
24-PHAS-3454	1	3294	nc	na	-	-
24-PHAS-3457	1	7500	nc	miR2275	-	-
24-PHAS-3458	0	3953	nc	na	-	-
24-PHAS-3460	8	22034	nc	miR2275	-	-
24-PHAS-3463	1	3444	nc	na	-	-
24-PHAS-3464	4	10100	nc	na	-	-
24-PHAS-3465	0	6346	nc	na	-	-
24-PHAS-3468	0	1073	nc	na	-	-
24-PHAS-3471	12	48242	nc	miR2275	-	-
24-PHAS-3474	33	87383	nc	na	-	-
24-PHAS-3475	6	37296	nc	na	-	-
24-PHAS-3477	0	6535	nc	na	-	-
24-PHAS-3479	2	10895	nc	na	-	-
24-PHAS-3481	2	8098	nc	na	-	-
24-PHAS-3483	9	45874	nc	na	-	-
24-PHAS-3488	17	39083	nc	na	-	-
24-PHAS-3490	1	1527	nc	na	-	-
24-PHAS-3491	45	130038	nc	miR2275	-	-
24-PHAS-3495	0	5262	nc	miR2275	-	-
24-PHAS-350	10	28969	nc	na	-	-
24-PHAS-3500	25	115012	nc	na	-	-
24-PHAS-3501	2	3925	nc	na	-	-
24-PHAS-3507	0	8664	nc	na	-	-
24-PHAS-3511	0	7397	nc	miR2275	-	-
24-PHAS-3512	0	1696	nc	na	-	-
24-PHAS-352	4	13330	nc	na	-	-
24-PHAS-3522	4	13313	nc	na	-	-
24-PHAS-3523	8	33610	nc	na	-	-
24-PHAS-3524	96	356012	nc	na	-	-
24-PHAS-3525	14	50918	nc	na	-	-
24-PHAS-3527	2	14138	nc	na	-	-
24-PHAS-3531	88	113984	nc	miR2275	-	-
24-PHAS-3532	1	7727	nc	na	-	-
24-PHAS-3535	1	1412	nc	na	-	-
24-PHAS-3536	0	1451	nc	na	-	-
24-PHAS-3537	1	2935	nc	na	-	-
24-PHAS-3538	1	2605	nc	miR2275	-	-
24-PHAS-3544	14	38352	nc	na	-	-
24-PHAS-3549	0	3764	nc	na	-	-
24-PHAS-355	3	22358	nc	na	-	-
24-PHAS-3555	19	50727	nc	na	-	-
24-PHAS-3556	3	6969	nc	na	-	-
24-PHAS-3558	1	9228	nc	miR2275	-	-
24-PHAS-356	0	1271	nc	na	-	-
24-PHAS-3561	20	54814	nc	na	-	-
24-PHAS-3563	31	107152	nc	miR2275	-	-
24-PHAS-3564	3	14487	nc	miR2275	-	-
24-PHAS-3568	2	16745	nc	miR2275	-	-
24-PHAS-3569	12	22814	nc	miR2275	-	-
24-PHAS-357	10	34575	nc	miR2275	-	-
24-PHAS-3570	2	4577	nc	miR2275	-	-
24-PHAS-3571	4	22580	nc	na	-	foldback
24-PHAS-3574	1	4555	nc	miR2275	-	-
24-PHAS-3575	9	47550	nc	na	-	-
24-PHAS-3577	1	1663	nc	miR2275	-	-
24-PHAS-358	1	6474	nc	na	-	-
24-PHAS-3580	170	656679	nc	na	-	-
24-PHAS-3583	0	1097	nc	na	-	foldback
24-PHAS-3586	1	4777	nc	miR2275	-	-
24-PHAS-3591	0	2256	nc	na	-	-
24-PHAS-3593	7	13495	nc	miR2275	-	-
24-PHAS-3594	5	10564	nc	miR2275	-	-
24-PHAS-3597	4	22995	nc	na	-	-
24-PHAS-3598	15	83221	nc	na	-	-
24-PHAS-36	0	9709	nc	miR2275	-	foldback
24-PHAS-36	4	2382	nc	na	-	foldback
24-PHAS-360	4	17534	nc	na	-	-
24-PHAS-3601	96	399643	nc	na	-	foldback L-to-B
24-PHAS-3606	1	2702	nc	na	-	-
24-PHAS-3607	20	44825	nc	na	-	-
24-PHAS-3608	0	3227	nc	miR2275	-	-
24-PHAS-3609	13	42598	nc	miR2275	-	-
24-PHAS-361	1	1283	nc	na	-	-
24-PHAS-3611	3	8013	nc	na	-	-
24-PHAS-3612	25	69764	nc	na	-	-
24-PHAS-3616	2	2890	nc	miR2275	-	-
24-PHAS-3617	2	8595	nc	na	-	-
24-PHAS-3618	1	6225	nc	na	-	-
24-PHAS-3619	0	1605	nc	na	-	-
24-PHAS-3622	10	30569	nc	na	-	-
24-PHAS-3624	1	13785	nc	na	-	-
24-PHAS-3625	0	2695	nc	na	-	-
24-PHAS-3626	18	72616	nc	miR2275	-	-
24-PHAS-3630	5	27499	nc	na	-	-
24-PHAS-3631	4	20225	nc	miR2275	-	-
24-PHAS-3636	37	87633	nc	na	-	-
24-PHAS-3639	64	256824	nc	na	-	-
24-PHAS-3646	0	1124	nc	na	-	-
24-PHAS-3649	4	14288	nc	na	-	-
24-PHAS-3650	3	5820	nc	na	-	-
24-PHAS-3652	0	1512	nc	na	-	-
24-PHAS-3655	1	2657	nc	na	-	-
24-PHAS-3658	3	4133	nc	na	-	-
24-PHAS-366	28	119985	nc	miR2275	-	-
24-PHAS-3660	19	61488	nc	miR2275	-	-
24-PHAS-3661	3	15288	nc	na	-	-
24-PHAS-3662	19	55894	nc	na	-	-
24-PHAS-3664	2	2330	nc	na	-	-
24-PHAS-3668	7	84567	nc	na	-	-
24-PHAS-3669	8	28704	nc	na	-	-
24-PHAS-367	27	76015	nc	miR2275	-	-
24-PHAS-3670	36	99623	nc	miR2275	-	-
24-PHAS-3675	0	2368	nc	na	-	-
24-PHAS-3684	0	7897	nc	na	-	-
24-PHAS-3685	4	13771	nc	na	-	-
24-PHAS-3686	1	14097	nc	miR2275	-	-
24-PHAS-3687	9	50238	nc	miR2275	-	-
24-PHAS-3688	15	34684	nc	miR2275	-	-
24-PHAS-3689	66	167169	nc	miR2275	-	-
24-PHAS-3697	5	10827	nc	na	-	-
24-PHAS-3698	7	26935	nc	miR2275	-	-
24-PHAS-37	11	44789	nc	na	-	foldback
24-PHAS-37	22	100568	nc	na	-	foldback
24-PHAS-370	3	10994	nc	na	-	-
24-PHAS-3700	4	4976	nc	na	-	-
24-PHAS-3701	30	142572	nc	miR2275	-	-
24-PHAS-3702	1	9959	nc	miR2275	-	-
24-PHAS-3703	0	3023	nc	na	-	-
24-PHAS-3704	1	2493	nc	na	-	-
24-PHAS-3707	5	42859	nc	na	-	foldback
24-PHAS-3709	2	15326	nc	miR2275	-	-
24-PHAS-371	1	2361	up	na	-	-
24-PHAS-3711	9	10406	nc	na	-	-
24-PHAS-3712	0	3565	nc	na	-	-
24-PHAS-3715	0	14936	nc	na	-	-
24-PHAS-3716	11	20792	nc	na	-	foldback L-to-B
24-PHAS-3717	3	4147	nc	miR2275	-	-
24-PHAS-3721	3	2388	nc	na	-	-
24-PHAS-3722	3	7543	nc	na	-	-
24-PHAS-3723	3	13007	nc	na	-	-
24-PHAS-3725	4	16170	nc	miR2275	-	-
24-PHAS-3726	7	13335	nc	na	-	-
24-PHAS-3727	0	3756	nc	na	-	-
24-PHAS-3729	0	2640	nc	na	-	-
24-PHAS-3733	0	3727	nc	na	-	-
24-PHAS-3739	0	3108	nc	miR2275	-	-
24-PHAS-374	17	50210	nc	na	-	-
24-PHAS-3740	3	3228	nc	na	-	-
24-PHAS-3741	39	77287	nc	na	-	-
24-PHAS-3745	0	3846	nc	na	-	-
24-PHAS-3749	103	302774	nc	na	-	-
24-PHAS-3752	14	35961	nc	miR2275	-	foldback
24-PHAS-3754	0	2427	nc	na	-	foldback
24-PHAS-3755	1	6671	nc	na	-	-
24-PHAS-3757	11	67062	nc	na	-	-
24-PHAS-3761	1	3289	nc	na	-	-
24-PHAS-3763	100	242679	nc	na	-	-
24-PHAS-3764	4	14994	nc	miR2275	-	-
24-PHAS-3766	0	1279	nc	na	-	-
24-PHAS-3768	0	801	nc	miR2275	-	-
24-PHAS-3769	0	1485	nc	na	-	-
24-PHAS-3770	0	1958	nc	na	-	-
24-PHAS-3773	16	25271	nc	na	-	foldback
24-PHAS-3775	4	25613	nc	na	-	-
24-PHAS-3776	1	3808	nc	na	-	-
24-PHAS-3777	67	210871	nc	miR2275	-	-
24-PHAS-3778	1	1201	nc	na	-	-
24-PHAS-3779	15	72003	nc	miR2275	-	-
24-PHAS-3780	1	6289	nc	na	-	-
24-PHAS-3781	1	1710	nc	na	-	-
24-PHAS-3782	16	27585	nc	na	-	-
24-PHAS-3785	1	11605	nc	na	-	-
24-PHAS-3790	8	25663	nc	na	-	-
24-PHAS-3794	10	24647	nc	miR2275	-	-
24-PHAS-3796	0	1302	nc	na	-	-
24-PHAS-38	6	19719	nc	na	-	foldback
24-PHAS-380	12	39955	nc	na	-	-
24-PHAS-3801	3	2083	nc	miR2275	-	-
24-PHAS-3803	31	69847	nc	na	-	-
24-PHAS-3804	1	10003	nc	miR2275	-	-
24-PHAS-3805	7	23361	nc	miR2275	-	-
24-PHAS-3806	11	20883	nc	na	-	-
24-PHAS-381	0	9375	nc	na	-	-
24-PHAS-3811	0	3151	nc	miR2275	-	-
24-PHAS-3812	2	21411	nc	miR2275	-	-
24-PHAS-3813	70	227543	nc	na	-	-
24-PHAS-3814	11	18567	nc	na	-	-
24-PHAS-3817	3	23715	nc	na	-	-
24-PHAS-3818	2	14321	nc	miR2275	-	-
24-PHAS-3822	22	99438	nc	miR2275	-	-
24-PHAS-3823	4	13044	nc	na	-	-
24-PHAS-3826	11	39493	nc	na	-	-
24-PHAS-3828	3	4624	nc	na	-	-
24-PHAS-3829	8	55319	nc	miR2275	-	-
24-PHAS-383	0	2071	nc	na	-	-
24-PHAS-3831	3	4585	nc	na	-	-
24-PHAS-3832	0	1513	nc	miR2275	-	-
24-PHAS-3833	2	16694	nc	na	-	-
24-PHAS-3834	10	44051	nc	miR2275	-	-
24-PHAS-3836	0	15306	nc	na	-	foldback
24-PHAS-3837	14	36772	nc	na	-	-
24-PHAS-3844	4	6267	nc	na	-	-
24-PHAS-3845	48	157908	nc	miR2275	-	-
24-PHAS-3846	7	15655	nc	miR2275	-	-
24-PHAS-3847	3	7483	nc	na	-	-
24-PHAS-3852	2	45644	nc	miR2275	-	-
24-PHAS-3853	0	2702	nc	na	-	-
24-PHAS-3855	18	45763	nc	na	-	-
24-PHAS-3859	3	13027	nc	na	-	-
24-PHAS-386	0	14565	nc	na	-	-
24-PHAS-3861	2	4863	nc	miR2275	-	-
24-PHAS-3865	0	1049	nc	miR2275	-	-
24-PHAS-3867	37	66313	nc	miR2275	-	-
24-PHAS-3869	176	728320	nc	na	-	-
24-PHAS-387	0	4496	nc	na	-	-
24-PHAS-3870	0	1775	nc	na	-	-
24-PHAS-3874	22	54286	nc	na	-	-
24-PHAS-3878	0	1760	nc	miR2275	-	-
24-PHAS-388	0	1369	nc	na	-	-
24-PHAS-3880	0	9287	nc	na	-	-
24-PHAS-3881	1	8749	nc	na	-	-
24-PHAS-3883	1	4383	nc	na	-	-
24-PHAS-3884	4	21663	nc	miR2275	-	-
24-PHAS-3887	28	144817	nc	na	-	-
24-PHAS-3891	1	983	nc	na	-	-
24-PHAS-3892	0	2988	nc	na	-	-
24-PHAS-3893	4	6606	nc	miR2275	-	-
24-PHAS-3894	5	6544	nc	na	-	-
24-PHAS-3895	0	4514	nc	na	-	-
24-PHAS-3897	0	2547	nc	na	-	-
24-PHAS-3898	7	36998	nc	na	-	-
24-PHAS-390	0	1699	nc	miR2275	-	-
24-PHAS-3907	7	9417	nc	na	-	-
24-PHAS-3909	1	4278	nc	miR2275	-	foldback
24-PHAS-391	22	54549	nc	na	-	-
24-PHAS-3910	1	2401	nc	na	-	-
24-PHAS-3914	0	7140	nc	na	-	-
24-PHAS-3918	1	3940	nc	miR2275	-	-
24-PHAS-3919	0	2699	nc	na	-	foldback
24-PHAS-392	0	1674	nc	miR2275	-	-
24-PHAS-3926	1	5235	nc	miR2275	-	-
24-PHAS-3928	0	6251	nc	na	-	-
24-PHAS-3931	0	2418	nc	miR2275	-	-
24-PHAS-3933	0	2017	nc	miR2275	-	-
24-PHAS-3937	0	1339	co	na	Probable receptor protein kinase TMK1	-
24-PHAS-3938	3	10106	nc	na	-	-
24-PHAS-3939	1	4118	nc	na	-	-
24-PHAS-3942	6	14479	nc	miR2275	-	-
24-PHAS-3943	64	177713	nc	na	-	-
24-PHAS-3947	1	5516	nc	na	-	-
24-PHAS-3948	231	654337	nc	miR2275	-	-
24-PHAS-3949	3	9082	nc	na	-	-
24-PHAS-395	8	26140	nc	na	-	-
24-PHAS-3952	3	27585	nc	na	-	-
24-PHAS-3957	7	15332	nc	miR2275	-	-
24-PHAS-3960	2	19574	nc	na	-	-
24-PHAS-3963	16	29893	nc	na	-	-
24-PHAS-3964	1	2919	nc	miR2275	-	-
24-PHAS-3965	3	4115	nc	na	-	-
24-PHAS-3968	3	8379	nc	miR2275	-	-
24-PHAS-3969	0	1461	nc	miR2275	-	-
24-PHAS-397	8	13606	nc	miR2275	-	-
24-PHAS-3970	2	3004	nc	na	-	-
24-PHAS-3975	9	22019	nc	na	-	-
24-PHAS-3978	2	5906	nc	na	-	-
24-PHAS-3979	8	17098	nc	na	-	-
24-PHAS-398	2	1932	nc	na	-	-
24-PHAS-3981	10	18022	nc	na	-	-
24-PHAS-3985	5	31492	nc	miR2275	-	-
24-PHAS-3989	1	7545	nc	na	-	-
24-PHAS-3991	2	12012	nc	miR2275	-	-
24-PHAS-3992	0	3602	nc	na	-	-
24-PHAS-3994	5	13174	nc	na	-	-
24-PHAS-3995	6	45987	nc	miR2275	-	-
24-PHAS-3996	1	2166	nc	na	-	-
24-PHAS-3997	4	18991	nc	na	-	foldback
24-PHAS-3998	0	1550	nc	na	-	-
24-PHAS-3999	4	14206	nc	na	-	-
24-PHAS-4004	1	6643	nc	miR2275	-	-
24-PHAS-4006	1	13989	nc	miR2275	-	-
24-PHAS-401	0	2562	nc	na	-	-
24-PHAS-4011	16	40290	nc	miR2275	-	-
24-PHAS-4015	16	43738	nc	miR2275	-	-
24-PHAS-4017	0	894	nc	na	-	-
24-PHAS-4024	1	3943	nc	na	-	-
24-PHAS-4025	3	9954	nc	na	-	-
24-PHAS-4026	0	1032	nc	miR2275	-	-
24-PHAS-4028	4	18636	nc	na	-	-
24-PHAS-4030	8	20449	nc	miR2275	-	-
24-PHAS-4033	4	18679	nc	na	-	-
24-PHAS-4034	1	3776	nc	miR2275	-	-
24-PHAS-4037	3	7906	nc	miR2275	-	-
24-PHAS-4039	55	186685	nc	miR2275	-	-
24-PHAS-404	1	24698	nc	miR2275	-	-
24-PHAS-4041	14	47812	nc	miR2275	-	-
24-PHAS-4043	1	4236	nc	na	-	-
24-PHAS-4045	8	18122	nc	na	-	-
24-PHAS-4047	2	4648	nc	miR2275	-	-
24-PHAS-4051	2	18010	co	na	-	-
24-PHAS-4052	2	11156	nc	na	-	-
24-PHAS-4059	2	3634	nc	na	-	-
24-PHAS-4061	30	109265	nc	miR2275	-	foldback
24-PHAS-4064	2	17678	nc	na	-	-
24-PHAS-4065	0	2473	nc	miR2275	-	-
24-PHAS-4066	6	21340	nc	na	-	-
24-PHAS-407	1	5642	nc	na	-	-
24-PHAS-4070	1	4211	nc	na	-	-
24-PHAS-4077	5	22378	nc	miR2275	-	-
24-PHAS-4079	1	5496	nc	na	-	-
24-PHAS-4084	24	56468	nc	na	-	-
24-PHAS-4088	5	29588	nc	miR2275	-	-
24-PHAS-4089	23	88985	nc	na	-	-
24-PHAS-4090	3	9529	nc	miR2275	-	-
24-PHAS-4091	0	968	nc	miR2275	-	-
24-PHAS-4092	0	5277	nc	miR2275	-	-
24-PHAS-4096	0	1193	nc	na	-	-
24-PHAS-41	0	3841	nc	na	-	-
24-PHAS-410	0	2537	nc	miR2275	-	-
24-PHAS-4101	8	28204	nc	na	-	-
24-PHAS-4105	60	110135	nc	na	-	foldback
24-PHAS-4111	18	93076	nc	na	-	-
24-PHAS-4113	0	1839	nc	na	-	-
24-PHAS-4116	59	228843	nc	na	-	-
24-PHAS-4117	1	9737	nc	miR2275	-	-
24-PHAS-4119	3	3698	nc	na	-	-
24-PHAS-4120	3	4335	nc	na	-	-
24-PHAS-4122	0	2209	nc	miR2275	-	-
24-PHAS-4123	1	3879	nc	na	-	-
24-PHAS-4124	3	18876	nc	miR2275	-	-
24-PHAS-413	1	9343	nc	na	-	-
24-PHAS-4130	1	2889	nc	na	-	-
24-PHAS-4133	1	955	nc	na	-	-
24-PHAS-4135	10	17313	nc	na	-	-
24-PHAS-4138	12	33578	nc	miR2275	-	-
24-PHAS-4139	0	4696	nc	na	-	-
24-PHAS-4144	0	1549	co	miR2275	-	-
24-PHAS-4151	1	11249	nc	miR2275	-	-
24-PHAS-4153	12	48108	nc	na	-	-
24-PHAS-4155	10	34022	nc	na	-	-
24-PHAS-4156	20	65530	nc	na	-	-
24-PHAS-4158	15	61831	nc	na	-	-
24-PHAS-4160	2	20623	nc	na	-	-
24-PHAS-4162	1	4316	nc	na	-	-
24-PHAS-4163	1	1199	nc	miR2275	-	-
24-PHAS-417	9	41155	nc	miR2275	-	-
24-PHAS-4170	0	4902	nc	na	-	-
24-PHAS-4174	7	42580	nc	na	-	-
24-PHAS-4176	0	2103	nc	na	-	foldback
24-PHAS-4180	5	17115	nc	miR2275	-	-
24-PHAS-4181	1	3427	nc	na	-	-
24-PHAS-4184	1	5353	nc	na	-	-
24-PHAS-4186	13	53692	nc	na	-	-
24-PHAS-4187	17	57330	nc	miR2275	-	-
24-PHAS-4190	57	147284	nc	na	-	-
24-PHAS-4191	65	318535	nc	miR2275	-	-
24-PHAS-4192	1	3583	nc	na	-	-
24-PHAS-4193	11	69363	nc	miR2275	-	-
24-PHAS-4194	8	3088	nc	miR2275	-	-
24-PHAS-4197	0	2337	nc	na	-	-
24-PHAS-4199	0	4775	nc	na	-	-
24-PHAS-42	2	18663	nc	miR2275	-	foldback
24-PHAS-4202	1	6327	nc	miR2275	-	-
24-PHAS-4207	1	1593	nc	na	-	-
24-PHAS-4211	0	7291	nc	na	-	-
24-PHAS-4213	6	5364	nc	na	-	foldback
24-PHAS-4217	0	4290	nc	na	-	-
24-PHAS-4220	1	5552	nc	na	-	-
24-PHAS-4221	37	67757	nc	miR2275	-	-
24-PHAS-4222	1	5579	nc	na	-	-
24-PHAS-4223	9	37822	nc	na	-	-
24-PHAS-4224	0	1082	nc	miR2275	-	-
24-PHAS-4225	0	7178	nc	na	-	-
24-PHAS-4227	17	63388	nc	na	-	-
24-PHAS-4229	5	17119	nc	na	-	-
24-PHAS-423	0	2947	nc	na	-	-
24-PHAS-4234	1	4460	nc	na	-	-
24-PHAS-4237	8	25048	nc	na	-	-
24-PHAS-424	16	58232	nc	na	-	-
24-PHAS-4242	40	113044	nc	na	-	-
24-PHAS-4247	13	91186	nc	miR2275	-	-
24-PHAS-4249	58	283171	nc	na	-	-
24-PHAS-4251	61	151042	nc	na	-	-
24-PHAS-4254	13	21213	nc	na	-	-
24-PHAS-4255	3	3708	nc	na	-	-
24-PHAS-4257	0	1326	nc	na	-	-
24-PHAS-4258	3	6940	nc	na	-	-
24-PHAS-4260	68	234192	nc	na	-	-
24-PHAS-4261	30	70340	nc	miR2275	-	-
24-PHAS-4262	2	8048	nc	na	-	-
24-PHAS-4264	0	2497	nc	na	-	-
24-PHAS-4265	3	25123	nc	na	-	-
24-PHAS-4266	4	16674	nc	na	-	-
24-PHAS-4267	21	78410	nc	miR2275	-	-
24-PHAS-4271	0	1952	nc	na	-	-
24-PHAS-4276	13	44958	nc	na	-	-
24-PHAS-4277	0	3049	nc	na	-	-
24-PHAS-4279	0	3036	nc	na	-	-
24-PHAS-4280	3	24349	nc	na	-	-
24-PHAS-4282	1	5139	nc	miR2275	-	-
24-PHAS-4284	0	3500	nc	na	-	-
24-PHAS-4289	7	12960	nc	na	-	foldback
24-PHAS-429	0	1206	nc	na	-	-
24-PHAS-4290	0	1221	nc	na	-	-
24-PHAS-4295	1	10180	nc	na	-	-
24-PHAS-4297	5	21623	nc	miR2275	-	-
24-PHAS-4298	6	35183	nc	miR2275	-	-
24-PHAS-4299	14	30955	nc	miR2275	-	-
24-PHAS-43	6	19071	nc	na	-	-
24-PHAS-430	45	172443	nc	miR2275	-	-
24-PHAS-4303	0	2784	nc	na	-	-
24-PHAS-4305	1	3287	nc	miR2275	-	-
24-PHAS-4306	149	341873	nc	miR2275	-	-
24-PHAS-4308	15	61469	nc	na	-	-
24-PHAS-4309	0	9605	nc	miR2275	-	-
24-PHAS-431	17	37877	nc	na	-	-
24-PHAS-4310	1	1421	nc	miR2275	-	-
24-PHAS-4311	6	49290	nc	na	-	-
24-PHAS-4315	3	29646	nc	na	-	-
24-PHAS-4316	2	29917	nc	na	-	-
24-PHAS-4318	7	16059	nc	miR2275	-	-
24-PHAS-4319	14	20295	nc	na	-	-
24-PHAS-432	1	8552	nc	miR2275	-	-
24-PHAS-4320	1	5159	nc	na	-	-
24-PHAS-4324	1	6767	nc	na	-	-
24-PHAS-4325	14	38108	nc	miR2275	-	-
24-PHAS-4326	5	17548	nc	na	-	-
24-PHAS-4330	6	20148	nc	miR2275	-	-
24-PHAS-4334	7	44648	nc	na	-	-
24-PHAS-4335	9	18576	nc	miR2275	-	-
24-PHAS-4336	2	9743	nc	na	-	-
24-PHAS-4337	24	70580	nc	na	-	-
24-PHAS-4339	0	1420	co	miR2275	Membrane-anchored ubiquitin-fold protein 1	-
24-PHAS-4341	1	20012	nc	miR2275	-	-
24-PHAS-4343	9	56772	nc	miR2275	-	-
24-PHAS-4344	23	94392	nc	na	-	-
24-PHAS-4346	3	19598	nc	na	-	-
24-PHAS-4348	46	168863	nc	na	-	-
24-PHAS-4350	0	5341	nc	miR2275	-	-
24-PHAS-4351	10	46118	nc	na	-	-
24-PHAS-4352	3	13298	nc	na	-	-
24-PHAS-4353	17	63197	nc	na	-	-
24-PHAS-4354	1	8910	nc	na	-	-
24-PHAS-4357	0	3224	nc	na	-	-
24-PHAS-436	2	11323	nc	miR2275	-	-
24-PHAS-4361	1	1623	nc	miR2275	-	-
24-PHAS-4363	74	277063	nc	miR2275	-	-
24-PHAS-4364	5	13881	nc	miR2275	-	-
24-PHAS-4366	15	40697	nc	miR2275	-	-
24-PHAS-4367	4	11198	nc	na	-	-
24-PHAS-4369	11	50529	nc	na	-	-
24-PHAS-4371	1	7881	nc	na	-	-
24-PHAS-4372	14	32184	nc	miR2275	-	-
24-PHAS-4373	10	17177	nc	miR2275	-	-
24-PHAS-4374	0	943	nc	miR2275	-	-
24-PHAS-4378	1	6655	nc	na	-	-
24-PHAS-4379	1	12453	nc	miR2275	-	-
24-PHAS-4380	23	77032	nc	miR2275	-	-
24-PHAS-4381	11	40809	nc	na	-	-
24-PHAS-4383	7	13084	nc	na	-	-
24-PHAS-4384	8	18889	nc	na	-	-
24-PHAS-4386	4	18679	nc	na	-	-
24-PHAS-4387	1	5422	nc	na	-	-
24-PHAS-4388	1	6579	nc	na	-	-
24-PHAS-4389	43	254062	nc	na	-	-
24-PHAS-4394	1	4695	nc	miR2275	-	-
24-PHAS-4395	36	79779	nc	na	-	foldback
24-PHAS-4396	1	9514	nc	na	-	-
24-PHAS-4397	1	9944	nc	na	-	-
24-PHAS-4398	1	1619	nc	miR2275	-	-
24-PHAS-4399	1	5666	nc	na	-	-
24-PHAS-44	19	26018	nc	na	-	-
24-PHAS-4402	52	181527	nc	na	-	-
24-PHAS-4403	91	278335	nc	na	-	foldback
24-PHAS-4407	5	22611	nc	na	-	-
24-PHAS-4408	11	27432	nc	na	-	-
24-PHAS-4410	0	6514	nc	miR2275	-	-
24-PHAS-4412	2	7947	nc	na	-	foldback
24-PHAS-4413	4	11638	nc	na	-	-
24-PHAS-4415	12	48741	nc	miR2275	-	-
24-PHAS-4416	10	22214	nc	na	-	-
24-PHAS-4417	215	651926	nc	miR2275	-	-
24-PHAS-4418	4	6398	nc	miR2275	-	-
24-PHAS-442	3	6845	nc	miR2275	-	-
24-PHAS-4420	2	10532	nc	na	-	-
24-PHAS-4425	1	3908	nc	miR2275	-	-
24-PHAS-4427	0	952	nc	miR2275	-	-
24-PHAS-4428	2	9617	nc	na	-	-
24-PHAS-4429	5	23799	nc	miR2275	-	-
24-PHAS-4432	1	11372	nc	na	-	-
24-PHAS-4433	6	14358	nc	na	-	-
24-PHAS-4435	2	46732	nc	na	-	-
24-PHAS-444	1	4285	nc	na	-	-
24-PHAS-4440	0	4779	nc	miR2275	-	-
24-PHAS-4441	13	32880	nc	na	-	-
24-PHAS-4442	5	19776	nc	na	-	-
24-PHAS-4444	7	10506	nc	na	-	-
24-PHAS-4446	0	14463	nc	na	-	-
24-PHAS-445	8	57818	nc	miR2118	-	-
24-PHAS-4450	1	1607	nc	na	-	foldback
24-PHAS-4453	44	128048	nc	na	-	-
24-PHAS-4454	7	19042	nc	miR2275	-	-
24-PHAS-4455	1	10961	nc	na	-	-
24-PHAS-4457	45	129071	nc	na	-	-
24-PHAS-446	17	56731	nc	na	-	-
24-PHAS-4462	0	1420	co	miR2275	Membrane-anchored ubiquitin-fold protein 1	-
24-PHAS-4465	2	9546	nc	na	-	-
24-PHAS-4466	0	1496	nc	na	-	-
24-PHAS-447	0	2059	nc	na	-	-
24-PHAS-4471	3	3923	nc	miR2275	-	-
24-PHAS-4479	0	2414	nc	na	-	-
24-PHAS-4482	0	2796	nc	miR2275	-	-
24-PHAS-4483	6	20828	nc	na	-	-
24-PHAS-4485	2	16073	nc	na	-	foldback
24-PHAS-4489	4	25114	nc	na	-	-
24-PHAS-4490	0	4371	nc	miR2275	-	-
24-PHAS-4491	2	12771	nc	miR2275	-	-
24-PHAS-4494	2	979	nc	na	-	-
24-PHAS-4496	0	8357	nc	na	-	-
24-PHAS-4497	0	3622	nc	miR2275	-	-
24-PHAS-45	5	9459	nc	miR2275	-	foldback
24-PHAS-45	4	17557	nc	na	-	foldback
24-PHAS-4501	0	3501	nc	na	-	-
24-PHAS-4502	1	1691	nc	na	-	-
24-PHAS-4504	7	11960	nc	na	-	-
24-PHAS-4508	0	4876	nc	na	-	-
24-PHAS-4509	3	12411	nc	miR2275	-	-
24-PHAS-4512	16	66565	nc	na	-	-
24-PHAS-4513	8	63453	nc	na	-	-
24-PHAS-4515	26	63602	nc	miR2275	-	-
24-PHAS-4516	0	5268	nc	na	-	-
24-PHAS-4518	17	59727	nc	na	-	-
24-PHAS-4519	4	11447	nc	na	-	-
24-PHAS-452	2	10448	nc	na	-	-
24-PHAS-4520	54	214941	nc	na	-	-
24-PHAS-4527	0	2229	nc	na	-	-
24-PHAS-4529	14	47943	nc	miR2275	-	-
24-PHAS-453	4	23045	nc	na	-	-
24-PHAS-4530	33	141363	nc	na	-	-
24-PHAS-4531	0	1012	nc	na	-	-
24-PHAS-4532	4	3983	nc	na	-	-
24-PHAS-4535	0	1289	nc	na	-	-
24-PHAS-4537	54	149216	nc	miR2275	-	foldback
24-PHAS-4538	8	26404	nc	na	-	-
24-PHAS-4541	2	9083	nc	miR2275	-	-
24-PHAS-4542	0	3915	nc	na	-	-
24-PHAS-4543	3	8891	nc	miR2275	-	-
24-PHAS-4545	0	1274	nc	na	-	-
24-PHAS-4546	0	4790	nc	na	-	-
24-PHAS-4547	14	43144	nc	na	-	-
24-PHAS-4549	3	8652	nc	na	-	-
24-PHAS-4550	26	109648	nc	na	-	-
24-PHAS-4551	5	18322	nc	na	-	-
24-PHAS-4552	0	3381	nc	miR2275	-	foldback
24-PHAS-4553	104	340081	nc	na	-	-
24-PHAS-4554	0	1062	nc	miR2275	-	-
24-PHAS-4555	6	15529	nc	na	-	-
24-PHAS-4557	7	42677	nc	miR2275	-	-
24-PHAS-4558	1	2423	nc	na	-	-
24-PHAS-4559	5	14698	nc	na	-	-
24-PHAS-456	0	8252	nc	na	-	-
24-PHAS-4560	1	5202	nc	na	-	-
24-PHAS-4561	0	2382	nc	miR2275	-	-
24-PHAS-4562	7	84567	nc	na	-	-
24-PHAS-4564	1	8603	nc	miR2275	-	-
24-PHAS-4568	0	2408	nc	na	-	-
24-PHAS-457	6	2974	nc	na	-	-
24-PHAS-4571	1	774	nc	miR2275	-	-
24-PHAS-4572	33	70206	nc	na	-	-
24-PHAS-4575	1	2170	nc	miR2275	-	-
24-PHAS-4578	3	7061	nc	miR2275	-	-
24-PHAS-4579	1	7636	nc	na	-	-
24-PHAS-458	24	50979	nc	miR2275	-	-
24-PHAS-4581	10	33641	nc	miR2275	-	-
24-PHAS-4582	1	4915	nc	miR2275	-	-
24-PHAS-4583	7	25014	nc	na	-	-
24-PHAS-4584	0	1566	nc	na	-	-
24-PHAS-4587	0	7203	nc	miR2275	-	-
24-PHAS-4588	1	8613	nc	na	-	-
24-PHAS-4593	9	43046	nc	na	-	-
24-PHAS-4594	0	3292	nc	miR2275	-	-
24-PHAS-4596	14	50247	nc	na	-	-
24-PHAS-4602	32	152079	nc	na	-	-
24-PHAS-4603	1	2257	nc	na	-	-
24-PHAS-4604	2	2584	nc	miR2275	-	-
24-PHAS-4606	2	5538	nc	na	-	foldback
24-PHAS-4607	9	31205	nc	na	-	-
24-PHAS-4608	2	1573	nc	na	-	-
24-PHAS-4609	0	3678	nc	na	-	-
24-PHAS-461	0	757	nc	miR2275	-	-
24-PHAS-4610	0	3864	nc	miR2275	-	-
24-PHAS-4611	1	4843	nc	na	-	-
24-PHAS-4612	7	15897	nc	miR2275	-	-
24-PHAS-4614	0	1868	nc	na	-	-
24-PHAS-4616	3	19100	nc	na	-	-
24-PHAS-462	0	1066	nc	na	-	-
24-PHAS-4624	4	7465	nc	na	-	-
24-PHAS-4626	1	2028	nc	na	-	-
24-PHAS-4627	5	16771	nc	miR2275	-	-
24-PHAS-4628	3	20491	nc	miR2275	-	-
24-PHAS-463	11	23991	nc	na	-	-
24-PHAS-4630	19	48689	nc	na	-	-
24-PHAS-4632	0	4643	nc	miR2275	-	-
24-PHAS-4636	25	70878	nc	na	-	-
24-PHAS-4637	22	74864	nc	na	-	-
24-PHAS-464	1	11488	nc	na	-	-
24-PHAS-4641	6	15496	nc	na	-	-
24-PHAS-4645	8	23653	nc	miR2275	-	-
24-PHAS-4646	5	7541	nc	miR2275	-	-
24-PHAS-465	5	18496	nc	miR2275	-	-
24-PHAS-4650	1	1919	nc	na	-	-
24-PHAS-4651	0	2263	nc	na	-	-
24-PHAS-4657	24	79917	nc	miR2275	-	-
24-PHAS-4661	1	1593	nc	na	-	-
24-PHAS-4662	0	2974	nc	na	-	-
24-PHAS-4664	1	6125	nc	na	-	-
24-PHAS-4665	39	157646	nc	miR2275	-	-
24-PHAS-4666	1	5423	nc	na	-	-
24-PHAS-4667	3	2419	nc	na	-	-
24-PHAS-4669	0	3206	nc	na	-	-
24-PHAS-467	0	1512	nc	na	-	-
24-PHAS-4673	2	19486	nc	miR2275	-	-
24-PHAS-4675	34	69363	nc	miR2275	-	-
24-PHAS-4678	1	10763	nc	na	-	-
24-PHAS-4679	0	1450	nc	miR2275	-	-
24-PHAS-4680	1	5077	nc	na	-	-
24-PHAS-4682	1	7685	nc	miR2275	-	-
24-PHAS-4683	0	897	nc	miR2275	-	-
24-PHAS-4684	22	67037	nc	na	-	-
24-PHAS-4685	0	824	nc	na	-	-
24-PHAS-4689	26	50022	nc	miR2275	-	-
24-PHAS-4690	7	9319	nc	miR2275	-	-
24-PHAS-4691	0	1569	nc	na	-	-
24-PHAS-4692	0	1351	nc	na	-	-
24-PHAS-4694	0	3777	nc	na	-	-
24-PHAS-4696	0	4123	nc	na	-	-
24-PHAS-4698	0	2910	nc	miR2275	-	-
24-PHAS-47	3	19354	nc	miR2275	-	foldback
24-PHAS-47	4	4604	nc	miR2275	-	foldback
24-PHAS-4701	11	54533	nc	miR2275	-	-
24-PHAS-4702	0	4150	nc	na	-	-
24-PHAS-4704	0	2392	nc	na	-	-
24-PHAS-4706	1	8575	nc	na	-	-
24-PHAS-4712	0	2234	nc	na	-	-
24-PHAS-4713	4	7159	nc	miR2275	-	-
24-PHAS-4714	3	20980	nc	miR2275	-	-
24-PHAS-4718	14	29160	nc	miR2275	-	-
24-PHAS-4720	5	14845	nc	na	-	-
24-PHAS-4721	2	2356	nc	na	-	-
24-PHAS-4725	0	852	nc	na	-	-
24-PHAS-4726	7	13728	nc	miR2275	-	-
24-PHAS-4729	4	11320	nc	miR2275	-	-
24-PHAS-4730	7	43226	nc	na	-	-
24-PHAS-4731	5	15698	nc	na	-	-
24-PHAS-4733	0	1681	nc	na	-	-
24-PHAS-4735	0	4389	nc	na	-	-
24-PHAS-4738	19	60391	nc	na	-	-
24-PHAS-4739	0	1005	nc	na	-	-
24-PHAS-474	17	56082	nc	na	-	-
24-PHAS-4742	20	36405	nc	na	-	-
24-PHAS-4746	19	80190	nc	miR2275	-	-
24-PHAS-4748	14	60332	nc	na	-	-
24-PHAS-4749	0	2877	nc	miR2275	-	-
24-PHAS-475	32	98653	nc	na	-	-
24-PHAS-4750	1	935	nc	na	-	-
24-PHAS-4751	0	6985	nc	na	-	-
24-PHAS-4752	0	5969	nc	miR2275	-	-
24-PHAS-4755	10	21823	nc	miR2275	-	-
24-PHAS-4756	5	7049	nc	miR2275	-	-
24-PHAS-4757	9	23585	nc	miR2275	-	-
24-PHAS-4759	1	3102	nc	na	-	-
24-PHAS-4760	1	8022	nc	miR2275	-	-
24-PHAS-4764	42	151904	nc	miR2275	-	-
24-PHAS-4765	0	9892	nc	miR2275	-	-
24-PHAS-4766	12	19787	nc	miR2275	-	-
24-PHAS-4767	4	13061	nc	na	-	-
24-PHAS-4770	0	9067	nc	na	-	-
24-PHAS-4773	3	3527	nc	miR2275	-	-
24-PHAS-4774	6	26024	nc	na	-	-
24-PHAS-4778	1	2251	nc	na	-	-
24-PHAS-478	0	2013	nc	na	-	-
24-PHAS-4780	7	14114	nc	miR2275	-	-
24-PHAS-4782	82	312370	nc	na	-	-
24-PHAS-4785	2	1156	nc	miR2275	-	-
24-PHAS-4787	15	34761	nc	miR2275	-	-
24-PHAS-4788	1	8842	nc	na	-	-
24-PHAS-4789	1	6502	nc	na	-	-
24-PHAS-479	1	4264	nc	na	-	-
24-PHAS-4790	79	253383	nc	miR2275	-	-
24-PHAS-4791	11	59275	nc	na	-	-
24-PHAS-4794	0	956	nc	na	-	-
24-PHAS-4795	42	204554	nc	miR2275	-	-
24-PHAS-4797	2	9159	nc	na	-	-
24-PHAS-4799	7	10685	nc	na	-	-
24-PHAS-4800	4	14137	nc	miR2275	-	-
24-PHAS-4802	10	49902	nc	na	-	-
24-PHAS-4804	0	1019	nc	na	-	-
24-PHAS-4807	0	3628	nc	miR2275	-	-
24-PHAS-4811	24	85653	nc	na	-	-
24-PHAS-4813	45	148173	nc	miR2275	-	-
24-PHAS-4814	6	20166	nc	na	-	-
24-PHAS-4815	0	1216	nc	na	-	-
24-PHAS-4818	1	9367	nc	na	-	-
24-PHAS-4821	9	16433	nc	na	-	-
24-PHAS-4825	1	13675	nc	miR2275	-	-
24-PHAS-4827	0	2504	nc	na	-	-
24-PHAS-4829	0	6121	nc	na	-	-
24-PHAS-4830	0	2532	nc	na	-	-
24-PHAS-4832	86	249591	nc	miR2275	-	-
24-PHAS-4834	4	15023	nc	miR2275	-	-
24-PHAS-4837	1	16655	nc	na	-	-
24-PHAS-4839	3	21158	nc	miR2275	-	-
24-PHAS-4841	7	31982	nc	na	-	-
24-PHAS-4843	0	1201	nc	na	-	-
24-PHAS-4845	1	4279	nc	na	-	-
24-PHAS-4847	9	36336	nc	na	-	-
24-PHAS-4850	2	8178	nc	na	-	-
24-PHAS-486	11	21907	nc	na	-	-
24-PHAS-4861	0	4278	nc	miR2275	-	-
24-PHAS-4863	34	127533	nc	na	-	-
24-PHAS-4864	2	5624	nc	na	-	-
24-PHAS-4865	228	858128	nc	miR2275	-	-
24-PHAS-4866	0	11583	nc	na	-	-
24-PHAS-487	0	1229	nc	na	-	-
24-PHAS-4874	12	34754	nc	na	-	-
24-PHAS-488	17	62919	nc	na	-	-
24-PHAS-4881	10	65056	nc	miR2275	-	-
24-PHAS-4882	5	56438	nc	miR2275	-	-
24-PHAS-4885	1	1901	nc	miR2275	-	-
24-PHAS-4890	0	1543	nc	na	-	-
24-PHAS-4891	0	1608	nc	miR2275	-	-
24-PHAS-4892	25	86793	nc	na	-	-
24-PHAS-4893	7	14699	nc	na	-	-
24-PHAS-4894	10	54138	nc	miR2275	-	-
24-PHAS-4895	10	48394	nc	na	-	-
24-PHAS-4896	1	8310	nc	miR2275	-	-
24-PHAS-4897	2	4038	nc	na	-	-
24-PHAS-4898	0	3061	nc	na	-	-
24-PHAS-4899	1	6259	nc	na	-	-
24-PHAS-4900	0	9265	nc	na	-	-
24-PHAS-4902	0	2767	nc	na	-	foldback
24-PHAS-4903	1	3405	nc	na	-	-
24-PHAS-491	0	21948	nc	miR2275	-	foldback
24-PHAS-4910	21	79419	nc	miR2275	-	-
24-PHAS-4912	0	7420	nc	na	-	-
24-PHAS-4914	30	175570	nc	miR2275	-	-
24-PHAS-4916	5	26255	nc	na	-	-
24-PHAS-4919	11	26104	nc	na	-	-
24-PHAS-492	0	999	nc	na	-	-
24-PHAS-4920	6	16718	nc	na	-	-
24-PHAS-4921	0	3140	nc	miR2275	-	-
24-PHAS-4922	4	13308	nc	miR2275	-	-
24-PHAS-4923	0	1032	nc	na	-	-
24-PHAS-4924	5	16375	nc	miR2275	-	-
24-PHAS-4927	1	5718	nc	na	-	-
24-PHAS-4928	1	4501	nc	miR2275	-	-
24-PHAS-4930	4	10523	nc	miR2275	-	-
24-PHAS-4931	3	14139	nc	na	-	-
24-PHAS-4932	0	2186	nc	miR2275	-	-
24-PHAS-4934	3	17692	nc	na	-	-
24-PHAS-4935	0	1653	nc	na	-	-
24-PHAS-494	0	1889	nc	na	-	-
24-PHAS-4940	1	4770	nc	na	-	-
24-PHAS-4941	13	38037	nc	miR2275	-	-
24-PHAS-4944	2	2540	nc	na	-	foldback
24-PHAS-4947	1	6722	nc	na	-	-
24-PHAS-4949	1	1063	nc	na	-	-
24-PHAS-4953	10	48019	nc	miR2275	-	-
24-PHAS-4956	1	5420	nc	miR2275	-	-
24-PHAS-4958	2	16663	nc	na	-	-
24-PHAS-4959	3	11977	nc	miR2275	-	-
24-PHAS-4963	24	43542	nc	na	-	-
24-PHAS-4964	0	2021	nc	miR2275	-	-
24-PHAS-4965	25	78063	nc	na	-	-
24-PHAS-4969	6	7453	nc	na	-	-
24-PHAS-497	2	7517	nc	na	-	-
24-PHAS-4973	7	12071	nc	miR2275	-	-
24-PHAS-4975	1	7391	nc	na	-	-
24-PHAS-4978	0	1005	nc	na	-	-
24-PHAS-498	4	2382	nc	miR2275	-	-
24-PHAS-4980	3	11032	nc	na	-	-
24-PHAS-4982	1	3765	nc	miR2275	-	-
24-PHAS-4985	12	37618	nc	na	-	-
24-PHAS-4986	5	10111	nc	na	-	-
24-PHAS-4988	4	8085	nc	na	-	-
24-PHAS-499	8	53195	nc	na	-	-
24-PHAS-4990	3	5889	nc	miR2275	-	-
24-PHAS-4992	1	1443	nc	miR2275	-	-
24-PHAS-4997	6	23443	nc	na	-	-
24-PHAS-4999	5	26137	nc	na	-	-
24-PHAS-5	44	10230	nc	miR2275	-	foldback
24-PHAS-5	2	80421	nc	na	-	foldback
24-PHAS-50	0	948	nc	miR2275	-	-
24-PHAS-500	5	21076	nc	miR2275	-	-
24-PHAS-5000	19	37770	nc	na	-	-
24-PHAS-5001	2	1423	nc	na	-	-
[truncated: 1,398 more rows]

## Sheet: S14. 24-PHAS comparision
Table S14. Tallies of 24-nt phased loci for Asparagus and maize; and PHAS transcripts for Lilium and daylily.
For Lilium and daylily, counts of foldback PHAS precursors, instead of IR-type PHAS, were used to compute proportion of those that are IR-related, to provide the most conservative score of inverted-repeat related loci in these two species
		Lily					Asparagus					Daylily					Maize
		foldback PHAS1	Inferred IR-type PHAS 2	Non-IR PHAS	Total	foldback PHAS Proportion	foldback PHAS1	IR-type PHAS 2	Non-IR PHAS	Total	IR-type PHAS Proportion	foldback PHAS1	Inferred IR-type PHAS 2	Non-IR PHAS	Total	foldback PHAS Proportion	IR-type PHAS 2	Non-IR PHAS	Total	IR-type PHAS Proportion
21-PHAS	All	0	0	158	158	0	1	1	28	29	0.035	0		7	7	0	0	334	334	0
	Collapsed	0	0	119	119	0	-	-	-	-	-	0		3	3	0	-	-	-	-
24-PHAS	All	131	2930	3347	6277	0.02	11	52	11	63	0.825	1	87	391	392	0.002	4	108	112	0.037
	Collapsed	116	1477	1917	3394	0.034	-	-	-	-	-	1	48	244	245	0.004	-	-	-	-
22-PHAS	All	0	0	0	0	-	0	0	2	2	0	0	0	1	1	0	0	1	1	0
	Collapsed	0	0	0	0	-	-	-	-	-	-	0	0	1	1	0	-	-	-	-
1PHAS precursors displaying intramolecular fold-back and generating phasiRNAs from both arms with a 2-nt offset
2Inverted repeat structure predicted using available genome in Asparagus; and by inferring inverted-repeat from pairs of transcripts in Lilium.

## Sheet: S15. Ratio of abundances
Table S15. Ratio of 24-nt phasiRNAs abundances and other small RNA size classes (18 to 23-nt) in miR2275 triggered foldback PHAS precursors transcripts from lily.
To infer the pattern, fold-back precursors with the miR2275 trigger site matching precisely with P1, i.e. those assigned with phase index = 0 by the phasTER (n=18), were used as a representative set for this data.
P1 to P8 represent the first eight phased positions or cycles in a precursor.
PHAS-offset represents +1/-1 nt position with reference to the phased position
The 'Position' column represents relative positions, assigned to generate a consensus from fold-back precursors with the first phased position starting from 52nd nucleotide (a buffer of 2x24-nt, plus a 3-nt) on the top strand.
Arm	PHAS	PHAS-offset	Abun	Size	Class	Ratio
5-arm	P1	-1	30	24	Non 24-mers	0.181299
		0	145	18to20
			24	21
			185	22
			287	23
			10731	24	24-mers	0.82745
		+1	33	18to20
			38	21
			20	22
			1651	23
	P2	-1	10	24	Non 24-mers	0.066041
		0	15	18to20
			0	21
			10	22
			16	23
			5364	24	24-mers	0.933958
		+1	0	18to20
			26	21
			15	22
			298	23
	P3	0	81	18to20	Non 24-mers	0.162625
			75	21
			59	22
			381	23
			10267	24	24-mers	0.83697
		+1	5	18to20
			0	21
			0	22
			1416	23
			88	24
	P4	-1	5	23	Non 24-mers	0.24321
			0	24
		0	256	18to20
			129	21
			155	22
			1146	23
			10737	24	24-mers	0.756789
		+1	37	18to20
			27	21
			296	22
			1411	23
			20	24
	P5	-1	15	24	Non 24-mers	0.170983
		0	51	18to20
			33	21
			19	22
			439	23
			20682	24	24-mers	0.821016
		+1	10	18to20
			0	21
			85	22
			3875	23
	P6	0	34	18to20	Non 24-mers	0.148519
			0	21
			32	22
			78	23
			6865	24	24-mers	0.850365
		+1	0	18to20
			0	21
			9	22
			1055	23
	P7	-1	5	23	Non 24-mers	0.07378
			106	24
		0	73	18to20
			57	21
			55	22
			155	23
			10778	24	24-mers	0.926219
		+1	0	18to20
			30	21
			36	22
			456	23
	P8	-1	5	22	Non 24-mers	0.153465
			0	23
			18	24
		0	5	18to20
			109	21
			49	22
			425	23
			25792	24	24-mers	0.846534
		+1	23	18to20
			24	21
			39	22
			4000	23
3-arm	P1	-1	94	18to20	Non 24-mers	0.803664
			58	21
			375	22
			21	23
			3	24
		0	723	18to20	24-mers	0.19633
			321	21
			672	22
			1727	23
			972	24
	P2	-1	9	22	Non 24-mers	0.14625
			297	23
			0	24
		0	37	18to20
			57	21	24-mers	0.85374
			31	22
			61	23
			2872	24
	P3	-1	5	18to20	Non 24-mers	0.211357
			5	21
			49	22
			277	23
			36	24
		0	163	18to20	24-mers	0.788642
			5	21
			14	22
			472	23
			3658	24
	P4	-1	15	18to20	Non 24-mers	0.035216
			5	21
			54	22
			148	23
			47	24
		0	5	18to20
			41	21	24-mers	0.964783
			15	22
			86	23
			9989	24
		+1	0	18to20
			0	21
			0	22
			5	23
			210	24
	P5	-1	128	18to20	Non 24-mers	0.144152
			35	21
			69	22
			4985	23
			1022	24
		0	39	18to20
			609	21
			23	22
			756	23	24-mers	0.852762
			38611	24
		+1	0	18to20
			0	21
			9	22
			33	23
	P6	-1	5	18to20	Non 24-mers	0.114242
			5	21
			147	22
			7360	23
			90	24
		0	24	18to20
			38	21
			100	22	24-mers	0.885617
			654	23
			63932	24
		+1	0	18to20
			16	21
			5	22
			10	23
			737	24
	P7	-1	5	18to20	Non 24-mers	0.166864
			0	21
			36	22
			1409	23
			49	24
		0	0	18to20
			61	21
			31	22
			228	23	24-mers	0.833135
			8230	24
		+1	5	18to20
			0	21
			39	22
			10	23
			828	24
	P8	-1	5	18to20	Non 24-mers	0.187776
			9	21
			41	22
			677	23
			26	24
		0	227	18to20
			101	21
			167	22
			6356	23	24-mers	0.812223
			41105	24
		+1	1285	18to20
			96	21
			98	22
			447	23

## Sheet: S16. DCLs & AGOs
Table S16. Expression profile of Argonaute and Dicer protein candidates identified in Daylily (HL), Asparagus (AO) and Lilium (LM)
Meiotic and pre-meiotic columns represents corresponding stages in anther developemnt and 'Veg' column represents leaf tissue
Reproductive tissue enrichment is computed by using vegetative tissue (leaf) as control. If no expression detected in leaf samples, then the log-ratio could be computed and such cases are marked with 'n.d'
		Normalized Expression (TPM)			Enrichment in Reproductive Tissues (Log2)
HL	Gene	Pre-Meiotic	Meiotic	Veg	Pre-Meiotic	Meiotic
	DCL1	1.51	0.98	2.95	-0.966166	-1.58986
	DCL2	1.74	2.15	6.72	-1.94937	-1.64412
	DCL3	1.8	1.76	1.06	0.763933	0.731511
	DCL4	5.15	3.85	10.006	-0.958221	-1.37794
	DCL5	12.4925	32.634	0.307	5.34668	6.73199
LM	Gene	Pre-meiotic	Meiotic	Veg	Pre-Meiotic	Meiotic
	DCL1	1.3415	0.578	2.572	-0.939044	-2.15375
	DCL2	4.8885	3.489	13.005	-1.4116	-1.89818
	DCL3	2.0075	0.976	0.14	3.8419	2.80145
	DCL4	2.3645	1.89	4.788	-1.01789	-1.34104
	DCL5	12.5835	2.147	0.41	4.93977	2.38863
AO	Gene	Pre-Meiotic	Meiotic	Veg	Pre-Meiotic	Meiotic
	DCL1	6.067	4.977	15.76	-1.37721	-1.66292
	DCL2	37.239	52.962	87.034	-1.22476	-0.716621
	DCL3	2.646	2.892	1.833	0.529606	0.657861
	DCL4a	6.963	5.872	9.452	-0.440911	-0.686768
	DCL4b	7.588	9.078	3.432	1.14467	1.40332
	DCL5	2.99	3.43	2.5	0.258217	0.45628
DL	Gene	Pre-Meiotic	Meiotic	Veg	Pre-Meiotic	Meiotic
	AGO1a	100.722	90.2	13.579	2.89094	2.73175
	AGO1b	160.98	162.235	12.849	3.64715	3.65836
	AGO10b	6.7625	8.025	0.658	3.3614	3.60834
	AGO4a	241.488	277.894	29.431	3.03654	3.23913
	AGO4b	156.777	145.544	30.716	2.35165	2.24439
	AGO5	79.9135	111.706	34.427	1.2149	1.69809
	AGO6	6.093	5.962	0.93	2.71185	2.68049
	AGO7	4.568	1.163	0.74	2.62597	0.652254
LM	Gene	Pre-Meiotic	Meiotic	Veg	Pre-Meiotic	Meiotic
	AGO1a	26.0585	13.98	18.847	0.467419	-0.430971
	AGO1b	47.91	29.63	5.34	3.16542	2.47215
	AGO4a	50.5415	39.265	2.035	4.63437	4.27014
	AGO4b	14.6	7.062	2.411	2.59826	1.55045
	AGO5	40.029	44.582	0	n.d	n.d
	AGO6	4.1845	2.797	0.507	3.045	2.46382
AO	Gene	Pre-Meiotic	Meiotic	Veg	Pre-Meiotic	Meiotic
	AGO1a	67.685	47.948	34.563	0.969608	0.472242
	AGO1d	79.835	61.911	25.429	1.65055	1.28372
	AGO4a	68.261	65.465	24.279	1.49135	1.43101
	AGO5	50.934	42.059	19.237	1.40475	1.12853
	AGO6	10.044	14.371	1.069	3.232	3.74883
	AGO7	3.831	4.491	1.363	1.49094	1.72025
HL	Gene	Pre-Meiotic	Meiotic	Veg	Pre-Meiotic	Meiotic
	RDR1	6.235	6.538	9.095	-0.544684	-0.476224
	RDR2	1.8095	2.376	4.027	-1.15411	-0.761171
	RDR3	3.548	4.769	4.44	-0.323554	0.103127
	RDR6	4.051	4.967	3.158	0.359267	0.653364
LM	Gene	Pre-meiotic	Meiotic	Veg	Pre-Meiotic	Meiotic
	RDR1	6.205	4.077	19.615	-1.66045	-2.26638
	RDR2	1.5295	1.0915	1.376	0.15258	-0.334168
AO	Gene	Pre-Meiotic	Meiotic	Veg	Pre-Meiotic	Meiotic
	RDR1	14.831	14.115	17.909	-0.272069	-0.343456
	RDR2	3.199	3.434	1.761	0.861226	0.963495
